# Supplementary material for: DNA-mediated association of two histone-bound complexes of yeast Chromatin Assembly Factor-1 (CAF-1) drives tetrasome assembly in the wake of DNA replication
Source: eLife. 2017 Mar 18;6:e22799. doi: 10.7554/eLife.22799 (PMC5404915; doi:10.7554/eLife.22799)
Supplement: Figure 1—source data 1. — DOI: http://dx.doi.org/10.7554/eLife.22799.003 [file elife-22799-fig1-data1.xlsx]

## Sheet: Figure 1c
	FL CAF-1						tCAF-1						Recon Nucleosome						No chaperone
control samples													20.31	19.32	18.5	18.33	16.93		5.94	4.8	6.38	5.98	6.21	4.91
0.5		17.36	15.14	17.44						13.74	15.01
1	23.88	21.52	22.19	22.94			19.09	18.13	19.23	17.93	16.61
2	31.58	27.29	30.12	26.83			34.93	24.82	26.05	23.04	25.93
4	31.51	28.81	30.6	28.5			25.32	25.47	27.23	24.03	24.11
8	27.87						24.94	23.83	28.87

## Sheet: Figure 1 supplement 1c - above
	FL CAF-1							tCAF-1							Recon Nucleosome							No chaperone
control samples															0	0	0	0	0			8.12	8.35	6.92	6.75	6.2	6.13	5.75
0.5		4.18	3.74	3.97								3.56	4.86	5.36
1	0	2.57	0.53	1.15				3.23	1.12	0.5	0.54	1.37	2.87	3.48
2	0	0	0	0				0	0	0	0	0	0	0
4	0	0	0.39	0.43				0	0	0	0	0	0	0
8	0.41							0	0	0	0

## Sheet: Figure 1 supplement 1c - below
	FL CAF-1							tCAF-1							Recon Nucleosome							No chaperone
control samples															0	2.77	1.99	2.19	0.88	0.94		6.8	4.66	6.09	5.79	5.52	7.6	5.5
0.5		3.42	6.58	4.47								6.03	5.46	5.03
1	8.4	5.02	3.99	4.9				8.61	10.45	5.93	6.11	5.96	5.58	5.92
2	9.12	5.88	7.76	4.95				12.66	7.33	7.29	9.47	6.16	7.62	7.36
4	6.09	6.09	7.06	5.63				7.93	7.56	8.56	5.06	6.08	4.39	7.26
8	6.67							7.38	6.41	6.5	5.23
