# Supplementary material for: DNA-mediated association of two histone-bound complexes of yeast Chromatin Assembly Factor-1 (CAF-1) drives tetrasome assembly in the wake of DNA replication
Source: eLife. 2017 Mar 18;6:e22799. doi: 10.7554/eLife.22799 (PMC5404915; doi:10.7554/eLife.22799)
Supplement: Figure 7—source data 1. — DOI: http://dx.doi.org/10.7554/eLife.22799.016 [file elife-22799-fig7-data1.xlsx]

## Sheet: Sheet1
	FL CAF-1						tCAF-1						tCAF_dWHDa						tCAF_dWHDb						Recon Nucleosome						No chaperone						FL CAF_WHD**						tCAF_WHD**						FL CAF_WHDa
control samples																									20.31	19.32	18.5	18.33	16.93		5.94	4.8	6.38	5.98	6.21	4.91
0.5		17.36	15.14	17.44						13.74	15.01			9.82	6.83	9.15				9.93	10.14	9.1															20.37	14.97					10.73	9.25					16.78
1	23.88	21.52	22.19	22.94			19.09	18.13	19.23	17.93	16.61		12.69	10.14	8.67	10.37			14.78	10.76	11.32	10.95															26.08	20.86					12.38	10.66					21.07
2	31.58	27.29	30.12	26.83			34.93	24.82	26.05	23.04	25.93		12.87	12.8	10.58	14.21			12.96	8.14	12.67	13.82															29.05	24.77					15.96	14.02					28.36
4	31.51	28.81	30.6	28.5			25.32	25.47	27.23	24.03	24.11		13.05	14.06	6.29	13.44			9.8	7.5	9.82	14.19															28.76	26.39					14.57	10.88					26.41
8	27.87						24.94	23.83	28.87				13.8						9.58
[truncated: 1 more columns]
