# Supplementary material for: DNA-mediated association of two histone-bound complexes of yeast Chromatin Assembly Factor-1 (CAF-1) drives tetrasome assembly in the wake of DNA replication
Source: eLife. 2017 Mar 18;6:e22799. doi: 10.7554/eLife.22799 (PMC5404915; doi:10.7554/eLife.22799)
Supplement: Figure 7—source data 2. — DOI: http://dx.doi.org/10.7554/eLife.22799.017 [file elife-22799-fig7-data2.xlsx]

## Sheet: Sheet1
	FL CAF-1							tCAF-1							tCAF_dWHDa							tCAF_dWHDb							Recon Nucleosome							No chaperone							FL CAF_WHD**
control samples																													0	2.77	1.99	2.19	0.88	0.94		6.8	4.66	6.09	5.79	5.52	7.6	5.5
0.5		3.42	6.58	4.47								6.03	5.46	5.03		8.84	6.58	9.02					7.97	7.02	5.82																		7.13	3.39
1	8.4	5.02	3.99	4.9				8.61	10.45	5.93	6.11	5.96	5.58	5.92	8.44	6.82	8.35	9.31				12.96	11.55	9.47	6.95																		7.25	3.31
2	9.12	5.88	7.76	4.95				12.66	7.33	7.29	9.47	6.16	7.62	7.36	16.56	10.93	18.33	15.13				18.1	13.25	13.9	8.8																		4.71	3.17
4	6.09	6.09	7.06	5.63				7.93	7.56	8.56	5.06	6.08	4.39	7.26	15.17	20.24	18.77	23.17				21.81	19.89	21.41	8.3																		4.29	3.13
8	6.67							7.38	6.41	6.5	5.23				24.41							15.74
[truncated: 4 more columns]
