# Supplementary material for: DNA-mediated association of two histone-bound complexes of yeast Chromatin Assembly Factor-1 (CAF-1) drives tetrasome assembly in the wake of DNA replication
Source: eLife. 2017 Mar 18;6:e22799. doi: 10.7554/eLife.22799 (PMC5404915; doi:10.7554/eLife.22799)
Supplement: Supplementary file 1. — DOI: http://dx.doi.org/10.7554/eLife.22799.019 [file elife-22799-supp1.xlsx]

## Sheet: WT plot
protein	amino acids		Sequence	Time/min	WTH3-H4		WTH3-H4•tCAF-1
	start	end			Deut uptake	%Deut uptake	Deut uptake	%Deut uptake
H3	49	61	LREIRRYQKSTEL	0	0	0	0	0
H3		61	LREIRRYQKSTEL	0.01	0.117568	0.00979733	-0.051367	-0.00428058
H3		61	LREIRRYQKSTEL	1	7.55553	0.629627	7.00511	0.583759
H3		61	LREIRRYQKSTEL	10	7.55928	0.62994	7.69438	0.641198
H3		61	LREIRRYQKSTEL	30	7.34312	0.611927	7.50297	0.625248
H3		61	LREIRRYQKSTEL	60	7.37554	0.614628	7.46414	0.622011
H3	49	62	LREIRRYQKSTELL	0	0	0	0	0
H3	49	62	LREIRRYQKSTELL	0.01	0.059376	0.00456738	0.035595	0.00273808
H3	49	62	LREIRRYQKSTELL	1	7.67156	0.59012	7.02821	0.540632
H3	49	62	LREIRRYQKSTELL	10	7.6273	0.586716	7.84639	0.603569
H3	49	62	LREIRRYQKSTELL	30	7.92706	0.609774	7.70212	0.592471
H3	49	62	LREIRRYQKSTELL	60	7.92689	0.609761	7.75091	0.596224
H3	50	62	REIRRYQKSTELL	0	0	0	0	0
H3	50	62	REIRRYQKSTELL	0.01	-0.001029	-8.575e-05	0.018	0.0015
H3	50	62	REIRRYQKSTELL	1	6.84939	0.570782	6.44538	0.537115
H3	50	62	REIRRYQKSTELL	10	6.6507	0.554225	7.38481	0.615401
H3	50	62	REIRRYQKSTELL	30	7.21472	0.601227	7.17419	0.597849
H3	50	62	REIRRYQKSTELL	60	7.10723	0.592269	7.01535	0.584612
H3	52	62	IRRYQKSTELL	0	0	0	0	0
H3	52	62	IRRYQKSTELL	0.01	0.01124	0.001124	0.023471	0.0023471
H3	52	62	IRRYQKSTELL	1	5.69688	0.569688	4.64075	0.464075
H3	52	62	IRRYQKSTELL	10	5.61748	0.561748	5.50999	0.550999
H3	52	62	IRRYQKSTELL	30	5.73079	0.573079	5.66887	0.566887
H3	52	62	IRRYQKSTELL	60	5.74278	0.574278	5.59735	0.559735
H3	53	62	RRYQKSTELL	0	0	0	0	0
H3	53	62	RRYQKSTELL	0.01	-0.287773	-0.0319748	-0.306577	-0.0340641
H3	53	62	RRYQKSTELL	1	5.09136	0.565706	5.18937	0.576596
H3	53	62	RRYQKSTELL	10	5.06331	0.562589	5.4536	0.605955
H3	53	62	RRYQKSTELL	30	5.39477	0.599419	5.6777	0.630856
H3	53	62	RRYQKSTELL	60	5.41629	0.60181	5.3349	0.592767
H3	61	70	LLIRKLPFQR	0	0	0	0	0
H3	61	70	LLIRKLPFQR	0.01	0.058154	0.00726925	0.007348	0.0009185
H3	61	70	LLIRKLPFQR	1	3.72122	0.465153	2.295	0.286875
H3	61	70	LLIRKLPFQR	10	5.06858	0.633573	4.49546	0.561933
H3	61	70	LLIRKLPFQR	30	5.65215	0.706518	4.05126	0.506407
H3	61	70	LLIRKLPFQR	60	5.78774	0.723468	5.27175	0.658969
H3	61	71	LLIRKLPFQRL	0	0	0	0	0
H3	61	71	LLIRKLPFQRL	0.01	0.062094	0.00689933	0.041434	0.00460378
H3	61	71	LLIRKLPFQRL	1	3.98595	0.442883	2.55732	0.284147
H3	61	71	LLIRKLPFQRL	10	5.42971	0.603301	4.911	0.545666
H3	61	71	LLIRKLPFQRL	30	6.01306	0.668117	4.44456	0.49384
H3	61	71	LLIRKLPFQRL	60	6.17548	0.686165	5.64205	0.626894
H3	62	71	LIRKLPFQRL	0	0	0	0	0
H3	62	71	LIRKLPFQRL	0.01	0.068753	0.00859413	0.052594	0.00657425
H3	62	71	LIRKLPFQRL	1	3.52709	0.440886	2.37459	0.296824
H3	62	71	LIRKLPFQRL	10	4.63293	0.579116	4.19792	0.524741
H3	62	71	LIRKLPFQRL	30	5.15617	0.644522	3.84889	0.481111
H3	62	71	LIRKLPFQRL	60	5.33352	0.66669	4.80501	0.600627
H3	63	71	IRKLPFQRL	0	0	0	0	0
H3	63	71	IRKLPFQRL	0.01	0.084854	0.012122	0.051319	0.00733129
H3	63	71	IRKLPFQRL	1	2.85655	0.408078	1.88865	0.269808
H3	63	71	IRKLPFQRL	10	4.01199	0.573142	3.52126	0.503037
H3	63	71	IRKLPFQRL	30	4.49305	0.641865	3.16131	0.451616
H3	63	71	IRKLPFQRL	60	4.67188	0.667411	4.13145	0.590207
H3	84	90	RFQSSAV	0	0	0	0	0
H3	84	90	RFQSSAV	0.01	0.038764	0.00646067	0.012927	0.0021545
H3	84	90	RFQSSAV	1	1.63053	0.271756	1.19084	0.198473
H3	84	90	RFQSSAV	10	2.6236	0.437267	2.14048	0.356746
H3	84	90	RFQSSAV	30	2.99575	0.499291	2.17878	0.363129
H3	84	90	RFQSSAV	60	3.1968	0.532799	2.69415	0.449025
H3	84	91	RFQSSAVM	0	0	0	0	0
H3	84	91	RFQSSAVM	0.01	0.056451	0.00806443	0.07073	0.0101043
H3	84	91	RFQSSAVM	1	1.66679	0.238113	1.22895	0.175564
H3	84	91	RFQSSAVM	10	2.81107	0.401582	2.25352	0.321931
H3	84	91	RFQSSAVM	30	3.60398	0.514854	2.33258	0.333226
H3	84	91	RFQSSAVM	60	3.97162	0.567375	3.13239	0.447484
H3	92	98	ALQEASE	0	0	0	0	0
H3	92	98	ALQEASE	0.01	0.041274	0.006879	0.043292	0.00721533
H3	92	98	ALQEASE	1	0.0843403	0.0140567	0.0597848	0.00996413
H3	92	98	ALQEASE	10	0.506648	0.0844413	0.172012	0.0286686
H3	92	98	ALQEASE	30	1.26338	0.210564	0.0782454	0.0130409
H3	92	98	ALQEASE	60	1.87113	0.311855	0.31391	0.0523184
H3	92	99	ALQEASEA	0	0	0	0	0
H3	92	99	ALQEASEA	0.01	0.035203	0.005029	0.081608	0.0116583
H3	92	99	ALQEASEA	1	0.0354509	0.00506442	0.0202326	0.00289037
H3	92	99	ALQEASEA	10	0.195003	0.0278576	0.14361	0.0205157
H3	92	99	ALQEASEA	30	1.05486	0.150694	0.126312	0.0180446
H3	92	99	ALQEASEA	60	2.26464	0.32352	0.22136	0.0316228
H3	104	110	LFEDTNL	0	0	0	0	0
H3	104	110	LFEDTNL	0.01	0.038398	0.00639967	0.108675	0.0181125
H3	104	110	LFEDTNL	1	0.655406	0.109234	0.327733	0.0546222
H3	104	110	LFEDTNL	10	1.10058	0.18343	3.13318	0.522196
H3	104	110	LFEDTNL	30	1.91632	0.319387	3.31693	0.552822
H3	104	110	LFEDTNL	60	2.56843	0.428071	3.36285	0.560474
H3	111	121	CAIHAKRVTIM	0	0	0	0	0
H3	111	121	CAIHAKRVTIM	0.01	0.048963	0.0048963	0.014511	0.0014511
H3	111	121	CAIHAKRVTIM	1	2.3339	0.23339	2.77967	0.277967
H3	111	121	CAIHAKRVTIM	10	3.24376	0.324376	5.35307	0.535307
H3	111	121	CAIHAKRVTIM	30	4.58968	0.458968	5.77683	0.577683
H3	111	121	CAIHAKRVTIM	60	5.19346	0.519346	5.62707	0.562707
H3	111	124	CAIHAKRVTIMPKD	0	0	0	0	0
H3	111	124	CAIHAKRVTIMPKD	0.01	0.091808	0.00765067	0.102291	0.00852425
H3	111	124	CAIHAKRVTIMPKD	1	3.1155	0.259625	3.50372	0.291977
H3	111	124	CAIHAKRVTIMPKD	10	4.10434	0.342028	6.92349	0.576957
H3	111	124	CAIHAKRVTIMPKD	30	5.48	0.456667	7.14121	0.595101
H3	111	124	CAIHAKRVTIMPKD	60	6.49958	0.541632	6.95642	0.579702
H4	2	25	SGRGKGGKGLGKGGAKRHRKVLRD	0	0	0	0	0
H4	2	25	SGRGKGGKGLGKGGAKRHRKVLRD	0.01	0.078853	0.00342839	0.115889	0.00503865
H4	2	25	SGRGKGGKGLGKGGAKRHRKVLRD	1	9.35419	0.406704	9.53076	0.414381
H4	2	25	SGRGKGGKGLGKGGAKRHRKVLRD	10	8.79051	0.382196	9.88102	0.42961
H4	2	25	SGRGKGGKGLGKGGAKRHRKVLRD	30	9.29544	0.40415	9.84833	0.428188
H4	2	25	SGRGKGGKGLGKGGAKRHRKVLRD	60	9.39853	0.408632	9.41069	0.40916
H4	26	50	NIQGITKPAIRRLARRGGVKRISGL	0	0	0	0	0
H4	26	50	NIQGITKPAIRRLARRGGVKRISGL	0.01	0.056244	0.00244539	0.052938	0.00230165
H4	26	50	NIQGITKPAIRRLARRGGVKRISGL	1	11.495	0.499783	6.59126	0.286576
H4	26	50	NIQGITKPAIRRLARRGGVKRISGL	10	15.0469	0.654215	15.3954	0.669366
H4	26	50	NIQGITKPAIRRLARRGGVKRISGL	30	15.5095	0.674324	15.165	0.659349
H4	26	50	NIQGITKPAIRRLARRGGVKRISGL	60	15.5258	0.675034	15.4532	0.671877
H4	31	50	TKPAIRRLARRGGVKRISGL	0	0	0	0	0
H4	31	50	TKPAIRRLARRGGVKRISGL	0.01	-0.01078	-0.000598889	-0.309575	-0.0171986
H4	31	50	TKPAIRRLARRGGVKRISGL	1	9.611	0.533944	4.73023	0.262791
H4	31	50	TKPAIRRLARRGGVKRISGL	10	12.7243	0.706906	12.9488	0.71938
H4	31	50	TKPAIRRLARRGGVKRISGL	30	13.351	0.741721	12.5588	0.697708
H4	31	50	TKPAIRRLARRGGVKRISGL	60	13.1537	0.73076	12.9576	0.719868
H4	51	59	IYEETRGVL	0	0	0	0	0
H4	51	59	IYEETRGVL	0.01	0.084462	0.0105577	0.023532	0.0029415
H4	51	59	IYEETRGVL	1	1.62015	0.202519	1.21152	0.15144
H4	51	59	IYEETRGVL	10	2.80448	0.35056	3.12265	0.390331
H4	51	59	IYEETRGVL	30	3.83081	0.478851	3.06962	0.383702
H4	51	59	IYEETRGVL	60	4.29114	0.536392	4.17731	0.522163
H4	51	61	IYEETRGVLKV	0	0	0	0	0
H4	51	61	IYEETRGVLKV	0.01	0.044448	0.0044448	0.078544	0.0078544
H4	51	61	IYEETRGVLKV	1	1.50433	0.150433	1.29607	0.129607
H4	51	61	IYEETRGVLKV	10	2.75535	0.275535	3.08086	0.308086
H4	51	61	IYEETRGVLKV	30	4.0787	0.40787	2.83922	0.283922
H4	51	61	IYEETRGVLKV	60	4.99728	0.499728	4.22579	0.422579
H4	52	59	YEETRGVL	0	0	0	0	0
H4	52	59	YEETRGVL	0.01	0.111709	0.0159584	0.06112	0.00873143
H4	52	59	YEETRGVL	1	1.13578	0.162254	1.0692	0.152742
H4	52	59	YEETRGVL	10	1.79618	0.256597	2.86914	0.409877
H4	52	59	YEETRGVL	30	3.07262	0.438946
H4	52	59	YEETRGVL	60	3.28091	0.468702	3.77674	0.539535
H4	53	59	EETRGVL	0	0	0	0	0
H4	53	59	EETRGVL	0.01	0.023876	0.00397933	0.01213	0.00202167
H4	53	59	EETRGVL	1	1.31909	0.219848	0.883871	0.147312
H4	53	59	EETRGVL	10	2.30717	0.384529	2.51224	0.418706
H4	53	59	EETRGVL	30	3.25415	0.542358	2.45555	0.409259
H4	53	59	EETRGVL	60	3.5223	0.58705	3.42902	0.571504
H4	60	66	KVFLENV	0	0	0	0	0
H4	60	66	KVFLENV	0.01	0.045462	0.007577	0.033472	0.00557867
H4	60	66	KVFLENV	1	0.139204	0.0232007	0.00890765	0.00148461
H4	60	66	KVFLENV	10	0.530026	0.0883377	0.110551	0.0184251
H4	60	66	KVFLENV	30	1.09882	0.183137	0.144114	0.024019
H4	60	66	KVFLENV	60	1.7527	0.292117	0.442274	0.0737123
H4	62	69	FLENVIRD	0	0	0	0	0
H4	62	69	FLENVIRD	0.01	0.054806	0.00782943	0.078394	0.0111991
H4	62	69	FLENVIRD	1	0.334511	0.0477874	0.277481	0.0396402
H4	62	69	FLENVIRD	10	0.825907	0.117987	0.339138	0.0484482
H4	62	69	FLENVIRD	30	1.56732	0.223902	0.422658	0.0603797
H4	62	69	FLENVIRD	60	2.38687	0.340981	0.867554	0.123936
H4	64	72	ENVIRDAVT	0	0	0	0	0
H4	64	72	ENVIRDAVT	0.01	0.032918	0.00411475	-0.015654	-0.00195675
H4	64	72	ENVIRDAVT	1	0.331711	0.0414638	0.104279	0.0130349
H4	64	72	ENVIRDAVT	10	0.983536	0.122942	0.572016	0.071502
H4	64	72	ENVIRDAVT	30	2.27691	0.284613	0.448993	0.0561241
H4	64	72	ENVIRDAVT	60	3.22468	0.403085	0.837396	0.104674
H4	73	85	YTEHAKRKTVTAM	0	0	0	0	0
H4	73	85	YTEHAKRKTVTAM	0.01	0.041845	0.00348708	-0.039655	-0.00330458
H4	73	85	YTEHAKRKTVTAM	1	4.59914	0.383261	2.93023	0.244186
H4	73	85	YTEHAKRKTVTAM	10	5.21293	0.434411	4.29215	0.357679
H4	73	85	YTEHAKRKTVTAM	30	5.41832	0.451527	5.12933	0.427444
H4	73	85	YTEHAKRKTVTAM	60	5.93426	0.494522	5.15834	0.429862
H4	87	103	VVYALKRQGRTLYGFGG	0	0	0	0	0
H4	87	103	VVYALKRQGRTLYGFGG	0.01	0.063676	0.00397975	0.143622	0.00897638
H4	87	103	VVYALKRQGRTLYGFGG	1	7.30265	0.456416	6.3039	0.393994
H4	87	103	VVYALKRQGRTLYGFGG	10	7.97763	0.498602	7.63744	0.47734
H4	87	103	VVYALKRQGRTLYGFGG	30	8.55572	0.534732	7.7835	0.486469
H4	87	103	VVYALKRQGRTLYGFGG	60	9.02206	0.563879	7.94704	0.49669
H4	90	103	ALKRQGRTLYGFGG	0	0	0	0	0
H4	90	103	ALKRQGRTLYGFGG	0.01	0.069154	0.00531954	0.051132	0.00393323
H4	90	103	ALKRQGRTLYGFGG	1	7.76455	0.597273	6.74349	0.51873
H4	90	103	ALKRQGRTLYGFGG	10	7.90637	0.608182	8.12548	0.625037
H4	90	103	ALKRQGRTLYGFGG	30	8.45564	0.650434	8.05071	0.619286
H4	90	103	ALKRQGRTLYGFGG	60	8.44667	0.649744	8.27378	0.636444
H4	91	103	LKRQGRTLYGFGG	0	0	0	0	0
H4	91	103	LKRQGRTLYGFGG	0.01	0.056617	0.00471808	0.079161	0.00659675
H4	91	103	LKRQGRTLYGFGG	1	4.53688	0.378073	9.0173	0.751442
H4	91	103	LKRQGRTLYGFGG	10	4.79073	0.399227	9.12641	0.760535
H4	91	103	LKRQGRTLYGFGG	30	5.07642	0.423035	9.22255	0.768546
H4	91	103	LKRQGRTLYGFGG	60	4.92398	0.410332	8.93437	0.744531

## Sheet: DM plot
protein	amino acids		Sequence	Time/min	DMH3-H4		DMH3-H4•tCAF-1
	start	end			Deut uptake	%Deut uptake	Deut uptake	%Deut uptake
H3	49	62	LREIRRYQKSTELL	0	0	0	0	0
H3		62	LREIRRYQKSTELL	0.01	0.101867	0.00783592	0.049706	0.00382354
H3		62	LREIRRYQKSTELL	1	7.70805	0.592927	6.59634	0.507411
H3		62	LREIRRYQKSTELL	10	7.74986	0.596143	6.73657	0.518198
H3		62	LREIRRYQKSTELL	30	7.69239	0.591723	7.51274	0.577903
H3		62	LREIRRYQKSTELL	60	7.74557	0.595813	7.64909	0.588391
H3	61	71	LLIRKLPFQRL	0	0	0	0	0
H3	61	71	LLIRKLPFQRL	0.01	0.057588	0.00639867	0.056422	0.00626911
H3	61	71	LLIRKLPFQRL	1	4.95271	0.550302	1.70536	0.189485
H3	61	71	LLIRKLPFQRL	10	6.10553	0.678392	2.25831	0.250924
H3	61	71	LLIRKLPFQRL	30	6.30584	0.700649	2.65465	0.294961
H3	61	71	LLIRKLPFQRL	60	6.27366	0.697074	2.68205	0.298005
H3	62	71	LIRKLPFQRL	0	0	0	0	0
H3	62	71	LIRKLPFQRL	0.01	0.061556	0.0076945	0.069127	0.00864087
H3	62	71	LIRKLPFQRL	1	4.15327	0.519158	1.65481	0.206851
H3	62	71	LIRKLPFQRL	10	5.24161	0.655201	2.16994	0.271243
H3	62	71	LIRKLPFQRL	30	5.42703	0.678379	2.4108	0.30135
H3	62	71	LIRKLPFQRL	60	5.41934	0.677417	2.31948	0.289935
H3	63	71	IRKLPFQRL	0	0	0	0	0
H3	63	71	IRKLPFQRL	0.01	0.070477	0.0100681	0.063884	0.00912629
H3	63	71	IRKLPFQRL	1	3.4682	0.495457	1.34001	0.19143
H3	63	71	IRKLPFQRL	10	4.57151	0.653073	1.56642	0.223774
H3	63	71	IRKLPFQRL	30	4.76115	0.680164	1.74627	0.249467
H3	63	71	IRKLPFQRL	60	4.73561	0.676516	1.65782	0.236832
H3	84	91	RFQSSAVM	0	0	0	0	0
H3	84	91	RFQSSAVM	0.01	0.047382	0.00676886	0.047473	0.00678186
H3	84	91	RFQSSAVM	1	1.61408	0.230583	1.00925	0.144178
H3	84	91	RFQSSAVM	10	3.35553	0.479362	1.26314	0.180449
H3	84	91	RFQSSAVM	30	3.96356	0.566223	1.7653	0.252186
H3	84	91	RFQSSAVM	60	4.09512	0.585017	1.78748	0.255354
H3	92	99	ALQEASEA	0	0	0	0	0
H3	92	99	ALQEASEA	0.01	0.032164	0.00459486	0.044484	0.00635486
H3	92	99	ALQEASEA	1	0.0589978	0.00842826	0.0349124	0.00498748
H3	92	99	ALQEASEA	10	-0.123714	-0.0176735	0.0525882	0.0075126
H3	92	99	ALQEASEA	30	4.67867	0.668381	-0.134446	-0.0192065
H3	92	99	ALQEASEA	60	4.86789	0.695412	-0.0117701	-0.00168144
H3	111	126	EAIHAKRVTIMPKDIQ	0	0	0	0	0
H3	111	126	EAIHAKRVTIMPKDIQ	0.01	0.057603	0.0041145	-0.001946	-0.000139
H3	111	126	EAIHAKRVTIMPKDIQ	1	8.27503	0.591073	2.68292	0.191637
H3	111	126	EAIHAKRVTIMPKDIQ	10	8.21155	0.586539	6.55863	0.468473
H3	111	126	EAIHAKRVTIMPKDIQ	30	8.25812	0.589866	7.93487	0.566777
H3	111	126	EAIHAKRVTIMPKDIQ	60	8.24861	0.589187	8.09223	0.578017
H3	111	127	EAIHAKRVTIMPKDIQA	0	0	0	0	0
H3	111	127	EAIHAKRVTIMPKDIQA	0.01	0.050692	0.00337947	0.056864	0.00379093
H3	111	127	EAIHAKRVTIMPKDIQA	1	9.04872	0.603248	3.1036	0.206907
H3	111	127	EAIHAKRVTIMPKDIQA	10	9.00939	0.600626	7.3304	0.488693
H3	111	127	EAIHAKRVTIMPKDIQA	30	9.0444	0.60296	8.84856	0.589904
H3	111	127	EAIHAKRVTIMPKDIQA	60	9.03455	0.602303	9.04081	0.602721
H3	113	127	IHAKRVTIMPKDIQA	0	0	0	0	0
H3	113	127	IHAKRVTIMPKDIQA	0.01	0.013441	0.00103392	0.044673	0.00343638
H3	113	127	IHAKRVTIMPKDIQA	1	7.96989	0.613069	2.56401	0.197232
H3	113	127	IHAKRVTIMPKDIQA	10	7.98738	0.614414	6.51138	0.500875
H3	113	127	IHAKRVTIMPKDIQA	30	7.89519	0.607322	7.84544	0.603495
H3	113	127	IHAKRVTIMPKDIQA	60	7.96714	0.612857	7.71037	0.593105
H4	2	25	SGRGKGGKGLGKGGAKRHRKVLRD	0	0	0	0	0
H4	2	25	SGRGKGGKGLGKGGAKRHRKVLRD	0.01	0.086335	0.0037537	0.055365	0.00240717
H4	2	25	SGRGKGGKGLGKGGAKRHRKVLRD	1	9.47469	0.411943	9.46102	0.411349
H4	2	25	SGRGKGGKGLGKGGAKRHRKVLRD	10	9.54204	0.414871	9.5223	0.414013
H4	2	25	SGRGKGGKGLGKGGAKRHRKVLRD	30	9.37201	0.407479	9.45297	0.410999
H4	2	25	SGRGKGGKGLGKGGAKRHRKVLRD	60	9.2757	0.403291	9.49684	0.412906
H4	26	50	NIQGITKPAIRRLARRGGVKRISGL	0	0	0	0	0
H4	26	50	NIQGITKPAIRRLARRGGVKRISGL	0.01	0.068169	0.00296387	0.067332	0.00292748
H4	26	50	NIQGITKPAIRRLARRGGVKRISGL	1	15.4963	0.673753	4.97909	0.216482
H4	26	50	NIQGITKPAIRRLARRGGVKRISGL	10	15.477	0.672911	8.06169	0.350508
H4	26	50	NIQGITKPAIRRLARRGGVKRISGL	30	15.3739	0.668431	9.74112	0.423527
H4	26	50	NIQGITKPAIRRLARRGGVKRISGL	60	15.3958	0.669384	10.4461	0.454177
H4	30	50	ITKPAIRRLARRGGVKRISGL	0	0	0	0	0
H4	30	50	ITKPAIRRLARRGGVKRISGL	0.01	0.043507	0.00228984	0.039258	0.00206621
H4	30	50	ITKPAIRRLARRGGVKRISGL	1	11.7126	0.616453	2.69204	0.141686
H4	30	50	ITKPAIRRLARRGGVKRISGL	10	11.888	0.625682	4.57004	0.240528
H4	30	50	ITKPAIRRLARRGGVKRISGL	30	11.5614	0.608493	4.98792	0.262522
H4	30	50	ITKPAIRRLARRGGVKRISGL	60	11.5882	0.609904	6.58607	0.346635
H4	31	50	TKPAIRRLARRGGVKRISGL	0	0	0	0	0
H4	31	50	TKPAIRRLARRGGVKRISGL	0.01	0.115739	0.00642994	0.13368	0.00742667
H4	31	50	TKPAIRRLARRGGVKRISGL	1	13.56	0.753331	4.10298	0.227943
H4	31	50	TKPAIRRLARRGGVKRISGL	10	13.1401	0.730008	7.68522	0.426957
H4	31	50	TKPAIRRLARRGGVKRISGL	30	13.4167	0.745374	8.72161	0.484534
H4	31	50	TKPAIRRLARRGGVKRISGL	60	13.5392	0.752177	9.21915	0.512175
H4	51	59	IYEETRGVL	0	0	0	0	0
H4	51	59	IYEETRGVL	0.01	0.077667	0.00970838	0.053452	0.0066815
H4	51	59	IYEETRGVL	1	2.42782	0.303478	0.767727	0.0959659
H4	51	59	IYEETRGVL	10	3.82361	0.477951	1.39935	0.174918
H4	51	59	IYEETRGVL	30	4.5199	0.564987	2.08032	0.26004
H4	51	59	IYEETRGVL	60	4.64662	0.580828	2.20784	0.27598
H4	51	61	IYEETRGVLKV	0	0	0	0	0
H4	51	61	IYEETRGVLKV	0.01	0.056701	0.0056701	0.120954	0.0120954
H4	51	61	IYEETRGVLKV	1	2.38637	0.238637	0.836745	0.0836745
H4	51	61	IYEETRGVLKV	10	4.90217	0.490217	1.38332	0.138332
H4	51	61	IYEETRGVLKV	30	5.72521	0.572521	2.0493	0.20493
H4	51	61	IYEETRGVLKV	60	6.18255	0.618255	2.23571	0.223571
H4	52	59	YEETRGVL	0	0	0	0	0
H4	52	59	YEETRGVL	0.01	0.053065	0.00758071	0.069029	0.00986129
H4	52	59	YEETRGVL	1	1.94569	0.277955	0.613573	0.0876534
H4	52	59	YEETRGVL	10	3.37028	0.481469	0.982103	0.1403
H4	52	59	YEETRGVL	30	4.36279	0.623256	1.5456	0.220799
H4	52	59	YEETRGVL	60	4.25455	0.607793	1.48274	0.21182
H4	60	66	KVFLENV	0	0	0	0	0
H4	60	66	KVFLENV	0.01	0.038479	0.00641317	-0.003009	-0.0005015
H4	60	66	KVFLENV	1	0.463668	0.077278	-0.111049	-0.0185081
H4	60	66	KVFLENV	10	2.09008	0.348347	-0.0325654	-0.00542757
H4	60	66	KVFLENV	30	3.23768	0.539613	0.182596	0.0304327
H4	60	66	KVFLENV	60	3.67293	0.612154	0.0104133	0.00173555
H4	62	69	FLENVIRD	0	0	0	0	0
H4	62	69	FLENVIRD	0.01	0.049366	0.00705229	0.143857	0.020551
H4	62	69	FLENVIRD	1	0.631753	0.0902504	0.3414	0.0487714
H4	62	69	FLENVIRD	10	2.51775	0.359678	0.337219	0.0481741
H4	62	69	FLENVIRD	30	4.0028	0.571828	0.354383	0.0506261
H4	62	69	FLENVIRD	60	4.62517	0.660738	0.355705	0.050815
H4	64	72	ENVIRDAVT	0	0	0	0	0
H4	64	72	ENVIRDAVT	0.01	0.039352	0.004919	0.084877	0.0106096
H4	64	72	ENVIRDAVT	1	0.464174	0.0580217	0.285018	0.0356272
H4	64	72	ENVIRDAVT	10	3.27786	0.409732	0.243513	0.0304391
H4	64	72	ENVIRDAVT	30	5.16243	0.645304	0.600032	0.0750039
H4	64	72	ENVIRDAVT	60	5.73076	0.716345	0.72265	0.0903312
H4	66	85	VIRDAVTYTEHAKRKTVTAM	0	0	0	0	0
H4	66	85	VIRDAVTYTEHAKRKTVTAM	0.01	0.126456	0.00665558	0.128107	0.00674247
H4	66	85	VIRDAVTYTEHAKRKTVTAM	1	5.73513	0.301849	1.40842	0.0741274
H4	66	85	VIRDAVTYTEHAKRKTVTAM	10	7.36818	0.387799	3.06346	0.161235
H4	66	85	VIRDAVTYTEHAKRKTVTAM	30	10.7859	0.567681	3.75856	0.197819
H4	66	85	VIRDAVTYTEHAKRKTVTAM	60	11.3012	0.594803	4.12649	0.217184
H4	86	103	DVVYALKRQGRTLYGFGG	0	0	0	0	0
H4	86	103	DVVYALKRQGRTLYGFGG	0.01	0.030617	0.001801	0.023098	0.00135871
H4	86	103	DVVYALKRQGRTLYGFGG	1	7.67138	0.451258	5.37496	0.316174
H4	86	103	DVVYALKRQGRTLYGFGG	10	9.48485	0.557932	6.3294	0.372318
H4	86	103	DVVYALKRQGRTLYGFGG	30	10.7088	0.629932	7.19534	0.423255
H4	86	103	DVVYALKRQGRTLYGFGG	60	11.1005	0.65297	7.15727	0.421016
H4	87	103	VVYALKRQGRTLYGFGG	0	0	0	0	0
H4	87	103	VVYALKRQGRTLYGFGG	0.01	0.081249	0.00507806	0.157681	0.00985506
H4	87	103	VVYALKRQGRTLYGFGG	1	7.25412	0.453382	5.25799	0.328624
H4	87	103	VVYALKRQGRTLYGFGG	10	8.99002	0.561876	6.11141	0.381963
H4	87	103	VVYALKRQGRTLYGFGG	30	9.98147	0.623842	6.90409	0.431505
H4	87	103	VVYALKRQGRTLYGFGG	60	10.0747	0.629667	7.00585	0.437865
H4	90	103	ALKRQGRTLYGFGG	0	0	0	0	0
H4	90	103	ALKRQGRTLYGFGG	0.01	0.067797	0.00521515	0.060202	0.00463092
H4	90	103	ALKRQGRTLYGFGG	1	7.85922	0.604555	5.84056	0.449273
H4	90	103	ALKRQGRTLYGFGG	10	8.36212	0.64324	7.07924	0.544557
H4	90	103	ALKRQGRTLYGFGG	30	8.42321	0.64794	7.51506	0.578081
H4	90	103	ALKRQGRTLYGFGG	60	8.41676	0.647443	7.67224	0.590172
H4	91	103	LKRQGRTLYGFGG	0	0	0	0	0
H4	91	103	LKRQGRTLYGFGG	0.01	0.051712	0.00430933	0.068429	0.00570242
H4	91	103	LKRQGRTLYGFGG	1	4.54094	0.378411	9.03355	0.752796
H4	91	103	LKRQGRTLYGFGG	10	4.75124	0.395936	9.09382	0.757818
H4	91	103	LKRQGRTLYGFGG	30	4.82831	0.402359	9.01088	0.750907
H4	91	103	LKRQGRTLYGFGG	60	4.90018	0.408349	9.06711	0.755593

## Sheet: Cac1 plot
protein	amino acids		Sequence	modification	Time/min	tCAF-1		DMH3-H4•tCAF-1		WTH3-H4•tCAF-1
	start	end				Deut uptake	%Deut uptake	Deut uptake	%Deut uptake	Deut uptake	%Deut uptake
Cac1	234	246	FKKLSDSNTPVVE		0	0	0	0	0	0	0
Cac1					0.01	0.081752	0.007432	0.063019	0.005729	0.08634	0.00784909
Cac1					1	5.99122	0.544656	6.11866	0.556242	6.02616	0.547833
Cac1					10	5.98878	0.544435	6.12053	0.556412	6.11442	0.555856
Cac1					30	5.95056	0.54096	6.05548	0.550498	6.14369	0.558517
Cac1					60	6.38842	0.580766	6.07678	0.552434	5.91138	0.537398
Cac1	234	246	FKKLSDSNTPVVE	Phosphoryl STY (5)	0	0	0	0	0	0	0
Cac1			FKKLSDSNTPVVE	Phosphoryl STY (5)	0.01	-0.020282	-0.00184382	0.007049	0.000640818	-0.010721	-0.000974636
Cac1			FKKLSDSNTPVVE	Phosphoryl STY (5)	1	5.57034	0.506394	5.77886	0.525351	5.68474	0.516795
Cac1			FKKLSDSNTPVVE	Phosphoryl STY (5)	10	5.45986	0.496351	5.83511	0.530465	5.7762	0.525109
Cac1			FKKLSDSNTPVVE	Phosphoryl STY (5)	30	5.67441	0.515856	5.77409	0.524918	5.8547	0.532245
Cac1			FKKLSDSNTPVVE	Phosphoryl STY (5)	60	5.66855	0.515323	5.7398	0.5218	5.64727	0.513388
Cac1	247	253	KSDYEKF		0	0	0	0	0	0	0
Cac1			KSDYEKF		0.01	0.032016	0.005336	0.009695	0.00161583	0.01806	0.00301
Cac1			KSDYEKF		1	0.232134	0.038689	0.173203	0.0288671	0.162102	0.0270169
Cac1			KSDYEKF		10	1.36883	0.228139	1.24932	0.208219	1.34474	0.224124
Cac1			KSDYEKF		30	2.23839	0.373065	2.22203	0.370339	2.24383	0.373971
Cac1			KSDYEKF		60	2.69563	0.449271	2.60831	0.434719	2.68982	0.448304
Cac1	247	257	KSDYEKFFLPF		0	0	0	0	0	0	0
Cac1			KSDYEKFFLPF		0.01	0.023757	0.00263967	-0.00855	-0.00095	0.018544	0.00206044
Cac1			KSDYEKFFLPF		1	0.252159	0.0280177	0.185234	0.0205815	0.213444	0.0237161
Cac1			KSDYEKFFLPF		10	2.09419	0.232688	1.82071	0.202302	2.04734	0.227482
Cac1			KSDYEKFFLPF		30	3.71484	0.41276	3.62508	0.402786	3.60558	0.400619
Cac1			KSDYEKFFLPF		60	4.50589	0.500655	4.37064	0.485626	4.42762	0.491957
Cac1	250	257	YEKFFLPF		0	0	0	0	0	0	0
Cac1			YEKFFLPF		0.01	0.025172	0.00419533	0.029182	0.00486367	0.024025	0.00400417
Cac1			YEKFFLPF		1	0.181259	0.0302098	0.223334	0.0372223	0.11776	0.0196267
Cac1			YEKFFLPF		10	1.10649	0.184415	1.14802	0.191337	0.899724	0.149954
Cac1			YEKFFLPF		30	2.16009	0.360016	2.09529	0.349215	2.17282	0.362136
Cac1			YEKFFLPF		60	3.17668	0.529447	2.73465	0.455775	3.17916	0.52986
Cac1	254	261	FLPFYAKD		0	0	0	0	0	0	0
Cac1			FLPFYAKD		0.01	-0.002657	-0.000442833	0.032391	0.0053985	-0.047725	-0.00795417
Cac1			FLPFYAKD		1	1.90346	0.317243	1.95	0.325001	1.91963	0.319938
Cac1			FLPFYAKD		10	3.048	0.507999	3.12022	0.520036	3.36416	0.560693
Cac1			FLPFYAKD		30	3.46857	0.578094	3.39583	0.565971	3.55506	0.592509
Cac1			FLPFYAKD		60	3.47602	0.579337	3.44762	0.574604	3.50346	0.58391
Cac1	254	271	FLPFYAKDGVRVSNKWKL		0	0	0	0	0	0	0
Cac1			FLPFYAKDGVRVSNKWKL		0.01	0.062932	0.00393325	0.066258	0.00414112	0.072507	0.00453169
Cac1			FLPFYAKDGVRVSNKWKL		1	5.98521	0.374075	6.01302	0.375814	6.07693	0.379808
Cac1			FLPFYAKDGVRVSNKWKL		10	8.24972	0.515608	8.27104	0.51694	8.50428	0.531517
Cac1			FLPFYAKDGVRVSNKWKL		30	9.32889	0.583055	9.33935	0.58371	9.59762	0.599851
Cac1			FLPFYAKDGVRVSNKWKL		60	9.76622	0.610389	9.79549	0.612218	9.83265	0.614541
Cac1	254	276	FLPFYAKDGVRVSNKWKLTKVEL		0	0	0	0	0	0	0
Cac1			FLPFYAKDGVRVSNKWKLTKVEL		0.01	0.070916	0.00337695	0.077877	0.00370843	0.059952	0.00285486
Cac1			FLPFYAKDGVRVSNKWKLTKVEL		1	7.8806	0.375266	7.9115	0.376738	7.9001	0.376195
Cac1			FLPFYAKDGVRVSNKWKLTKVEL		10	10.8861	0.518387	11.0057	0.524081	11.0927	0.528226
Cac1			FLPFYAKDGVRVSNKWKLTKVEL		30	11.8477	0.564176	12.0305	0.572881	12.1349	0.577854
Cac1			FLPFYAKDGVRVSNKWKLTKVEL		60	12.5022	0.595342	12.6144	0.600686	12.5661	0.598386
Cac1	256	276	PFYAKDGVRVSNKWKLTKVEL		0	0	0	0	0	0	0
Cac1			PFYAKDGVRVSNKWKLTKVEL		0.01	0.047973	0.00252489	0.054077	0.00284616	0.052426	0.00275926
Cac1			PFYAKDGVRVSNKWKLTKVEL		1	7.77633	0.40928	7.90546	0.416077	7.73604	0.40716
Cac1			PFYAKDGVRVSNKWKLTKVEL		10	10.6296	0.559453	10.8133	0.569119	10.8533	0.571226
Cac1			PFYAKDGVRVSNKWKLTKVEL		30	11.7157	0.616615	11.8346	0.622876	11.1932	0.589117
Cac1			PFYAKDGVRVSNKWKLTKVEL		60	12.3024	0.647494	12.4288	0.654146	12.3092	0.647851
Cac1	258	276	YAKDGVRVSNKWKLTKVEL		0	0	0	0	0	0	0
Cac1			YAKDGVRVSNKWKLTKVEL		0.01	-0.026626	-0.00147922	-0.002029	-0.000112722	-0.032061	-0.00178117
Cac1			YAKDGVRVSNKWKLTKVEL		1	6.62579	0.368099	6.78178	0.376766	6.71827	0.373237
Cac1			YAKDGVRVSNKWKLTKVEL		10	8.83425	0.490792	9.06037	0.503354	8.7492	0.486067
Cac1			YAKDGVRVSNKWKLTKVEL		30	9.7391	0.541061	9.87584	0.548658	10.1076	0.561531
Cac1			YAKDGVRVSNKWKLTKVEL		60	10.2917	0.57176	10.3579	0.575438	10.254	0.569667
Cac1	262	276	GVRVSNKWKLTKVEL		0	0	0	0	0	0	0
Cac1			GVRVSNKWKLTKVEL		0.01	0.026779	0.00191279	0.025983	0.00185593	0.016639	0.0011885
Cac1			GVRVSNKWKLTKVEL		1	5.67275	0.405196	5.76759	0.411971	5.69374	0.406696
Cac1			GVRVSNKWKLTKVEL		10	7.36941	0.526386	7.53018	0.53787	7.62681	0.544772
Cac1			GVRVSNKWKLTKVEL		30	8.06068	0.575763	8.16324	0.583089	8.24574	0.588982
Cac1			GVRVSNKWKLTKVEL		60	8.41321	0.600944	8.44642	0.603316	8.47065	0.605047
Cac1	277	287	EGSKRKIDDEL		0	0	0	0	0	0	0
Cac1			EGSKRKIDDEL		0.01	0.028187	0.0028187	0.017386	0.0017386	0.020199	0.0020199
Cac1			EGSKRKIDDEL		1	0.0116421	0.00116421	0.00409633	0.000409633	0.0670216	0.00670216
Cac1			EGSKRKIDDEL		10	0.309904	0.0309904	0.303314	0.0303314	0.28643	0.028643
Cac1			EGSKRKIDDEL		30	0.768672	0.0768672	0.746734	0.0746734	0.745869	0.0745869
Cac1			EGSKRKIDDEL		60	1.33115	0.133115	1.2617	0.12617	1.28808	0.128808
Cac1	277	288	EGSKRKIDDELL		0	0	0	0	0	0	0
Cac1			EGSKRKIDDELL		0.01	-0.313178	-0.0284707	-0.380119	-0.0345563	-0.311154	-0.0282867
Cac1			EGSKRKIDDELL		1	-0.435521	-0.0395929	-0.603226	-0.0548387	-0.393407	-0.0357643
Cac1			EGSKRKIDDELL		10	0.137377	0.0124888	-0.0273497	-0.00248634	0.199478	0.0181344
Cac1			EGSKRKIDDELL		30	0.816947	0.0742679	0.650205	0.0591096	0.821765	0.0747059
Cac1			EGSKRKIDDELL		60	1.19426	0.108569	0.997596	0.0906905	1.19332	0.108484
Cac1	288	300	LNSKDKTSSDDLL		0	0	0	0	0	0	0
Cac1			LNSKDKTSSDDLL		0.01	0.089379	0.00744825	0.073306	0.00610883	0.113324	0.00944367
Cac1			LNSKDKTSSDDLL		1	4.01656	0.334713	4.04208	0.33684	4.0566	0.33805
Cac1			LNSKDKTSSDDLL		10	4.44212	0.370176	4.5046	0.375383	4.58104	0.381753
Cac1			LNSKDKTSSDDLL		30	4.54631	0.378859	4.59306	0.382755	4.85115	0.404262
Cac1			LNSKDKTSSDDLL		60	4.8593	0.404942	4.80303	0.400252	4.87171	0.405976
Cac1	300	322	LNWLQSRRLPRGHKIKRKAVDVL		0	0	0	0	0	0	0
Cac1			LNWLQSRRLPRGHKIKRKAVDVL		0.01	0.055824	0.00265829	0.056887	0.0027089	0.048798	0.00232371
Cac1			LNWLQSRRLPRGHKIKRKAVDVL		1	4.16771	0.198462	4.15286	0.197755	4.10085	0.195278
Cac1			LNWLQSRRLPRGHKIKRKAVDVL		10	7.17607	0.341718	6.69175	0.318655	6.73778	0.320847
Cac1			LNWLQSRRLPRGHKIKRKAVDVL		30	7.77893	0.370425	7.51883	0.35804	7.51624	0.357916
Cac1			LNWLQSRRLPRGHKIKRKAVDVL		60	8.63653	0.411263	8.0613	0.383871	8.0516	0.38341
Cac1	301	322	NWLQSRRLPRGHKIKRKAVDVL		0	0	0	0	0	0	0
Cac1			NWLQSRRLPRGHKIKRKAVDVL		0.01	0.039334	0.0019667	0.040273	0.00201365	0.028137	0.00140685
Cac1			NWLQSRRLPRGHKIKRKAVDVL		1	3.90619	0.19531	4.03282	0.201641	4.0152	0.20076
Cac1			NWLQSRRLPRGHKIKRKAVDVL		10	6.27702	0.313851	6.14262	0.307131	6.31797	0.315899
Cac1			NWLQSRRLPRGHKIKRKAVDVL		30	7.03507	0.351754	6.79082	0.339541	6.81152	0.340576
Cac1			NWLQSRRLPRGHKIKRKAVDVL		60	7.71255	0.385627	7.29557	0.364778	7.46485	0.373243
Cac1	321	335	VLQQMPLKEKTDDEL		0	0	0	0	0	0	0
Cac1			VLQQMPLKEKTDDEL		0.01	0.028998	0.00223062	0.040984	0.00315262	0.027067	0.00208208
Cac1			VLQQMPLKEKTDDEL		1	6.42038	0.493875	6.45462	0.496509	6.3613	0.48933
Cac1			VLQQMPLKEKTDDEL		10	7.00756	0.539043	7.55398	0.581075	7.51207	0.577851
Cac1			VLQQMPLKEKTDDEL		30	7.01619	0.539707	7.49559	0.576584	7.58303	0.58331
Cac1			VLQQMPLKEKTDDEL		60	7.12956	0.548428	7.47406	0.574927	7.40481	0.569601
Cac1	323	335	QQMPLKEKTDDEL		0	0	0	0	0	0	0
Cac1			QQMPLKEKTDDEL		0.01	0.027064	0.00246036	0.021835	0.001985	0.037377	0.00339791
Cac1			QQMPLKEKTDDEL		1	5.59254	0.508413	5.4132	0.492109	5.33336	0.484851
Cac1			QQMPLKEKTDDEL		10	5.83552	0.530502	5.9767	0.543336	6.01693	0.546994
Cac1			QQMPLKEKTDDEL		30	5.77881	0.525346	5.9913	0.544664	6.08986	0.553624
Cac1			QQMPLKEKTDDEL		60	5.92876	0.538978	5.93724	0.539749	5.93879	0.53989
Cac1	339	349	LAQVPHKYIKF		0	0	0	0	0	0	0
Cac1			LAQVPHKYIKF		0.01	0.048402	0.005378	0.028748	0.00319422	0.015554	0.00172822
Cac1			LAQVPHKYIKF		1	0.118983	0.0132204	0.101099	0.0112332	0.0791597	0.00879552
Cac1			LAQVPHKYIKF		10	0.834914	0.0927683	0.624146	0.0693495	0.68704	0.0763378
Cac1			LAQVPHKYIKF		30	1.26723	0.140803	1.03856	0.115396	1.06141	0.117935
Cac1			LAQVPHKYIKF		60	1.53574	0.170637	1.21073	0.134525	1.40768	0.156409
Cac1	340	349	AQVPHKYIKF		0	0	0	0	0	0	0
Cac1			AQVPHKYIKF		0.01	0.015382	0.00192275	0.005848	0.000731	0.012514	0.00156425
Cac1			AQVPHKYIKF		1	0.0483481	0.00604352	0.0480627	0.00600784	0.0618282	0.00772852
Cac1			AQVPHKYIKF		10	0.453477	0.0566847	0.250409	0.0313012	0.272426	0.0340532
Cac1			AQVPHKYIKF		30	0.611043	0.0763804	0.400247	0.0500309	0.448825	0.0561032
Cac1			AQVPHKYIKF		60	0.806064	0.100758	0.524206	0.0655258	0.698148	0.0872686
Cac1	343	349	PHKYIKF		0	0	0	0	0	0	0
Cac1			PHKYIKF		0.01	0.054835	0.010967	0.018195	0.003639	0.040331	0.0080662
Cac1			PHKYIKF		1	0.0810719	0.0162144	0.030025	0.006005	0.139101	0.0278202
Cac1			PHKYIKF		10	0.523022	0.104604	0.3271	0.06542	0.545084	0.109017
Cac1			PHKYIKF		30	0.828315	0.165663	0.664493	0.132899	0.712183	0.142437
Cac1			PHKYIKF		60	1.04195	0.208391	0.783939	0.156788	1.01532	0.203064
Cac1	350	360	YENVRPPFIGT		0	0	0	0	0	0	0
Cac1			YENVRPPFIGT		0.01	0.052927	0.00661587	0.05064	0.00633	0.080474	0.0100592
Cac1			YENVRPPFIGT		1	1.31291	0.164114	1.11926	0.139907	1.25228	0.156535
Cac1			YENVRPPFIGT		10	2.26288	0.28286	1.77695	0.222119	2.11597	0.264496
Cac1			YENVRPPFIGT		30	2.53707	0.317134	2.18942	0.273677	2.39032	0.298791
Cac1			YENVRPPFIGT		60	2.76542	0.345677	2.34303	0.292878	2.69423	0.336778
Cac1	352	360	NVRPPFIGT		0	0	0	0	0	0	0
Cac1			NVRPPFIGT		0.01	0.09423	0.015705	0.06596	0.0109933	0.081957	0.0136595
Cac1			NVRPPFIGT		1	0.443064	0.0738439	0.0693457	0.0115576	0.297633	0.0496054
Cac1			NVRPPFIGT		10	1.10979	0.184964	0.380497	0.0634161	0.721413	0.120236
Cac1			NVRPPFIGT		30	1.30709	0.217848	0.617107	0.102851	0.862183	0.143697
Cac1			NVRPPFIGT		60	1.52185	0.253642	1.02731	0.171218	1.31277	0.218795
Cac1	365	380	FTLPPNDPFSTKGTGF		0	0	0	0	0	0	0
Cac1			FTLPPNDPFSTKGTGF		0.01	0.050139	0.00417825	0.059242	0.00493683	0.070882	0.00590683
Cac1			FTLPPNDPFSTKGTGF		1	2.97397	0.247831	2.66747	0.222289	3.03126	0.252605
Cac1			FTLPPNDPFSTKGTGF		10	5.28276	0.44023	4.90027	0.408356	5.47658	0.456381
Cac1			FTLPPNDPFSTKGTGF		30	5.82456	0.48538	5.73669	0.478057	6.01478	0.501232
Cac1			FTLPPNDPFSTKGTGF		60	6.45701	0.538084	5.89963	0.491636	6.37552	0.531293
Cac1	365	381	FTLPPNDPFSTKGTGFN		0	0	0	0	0	0	0
Cac1			FTLPPNDPFSTKGTGFN		0.01	0.052461	0.00403546	0.053093	0.00408408	0.025384	0.00195262
Cac1			FTLPPNDPFSTKGTGFN		1	3.58154	0.275503	3.2912	0.253169	3.6155	0.278115
Cac1			FTLPPNDPFSTKGTGFN		10	6.01873	0.462979	5.57815	0.429088	6.12498	0.471152
Cac1			FTLPPNDPFSTKGTGFN		30	6.49403	0.499541	6.40808	0.492929	6.89198	0.530152
Cac1			FTLPPNDPFSTKGTGFN		60	7.26447	0.558805	6.75362	0.51951	7.2913	0.560869
Cac1	367	380	LPPNDPFSTKGTGF		0	0	0	0	0	0	0
Cac1			LPPNDPFSTKGTGF		0.01	-0.041425	-0.0041425	0.036	0.0036	-0.041324	-0.0041324
Cac1			LPPNDPFSTKGTGF		1	2.49468	0.249468	1.98922	0.198922	2.72174	0.272174
Cac1			LPPNDPFSTKGTGF		10	4.66421	0.466421	4.5934	0.45934	4.89904	0.489904
Cac1			LPPNDPFSTKGTGF		30	5.60273	0.560273	5.01	0.501	5.35844	0.535844
Cac1			LPPNDPFSTKGTGF		60	5.77268	0.577268	5.32273	0.532273	5.62226	0.562226
Cac1	368	380	PPNDPFSTKGTGF		0	0	0	0	0	0	0
Cac1			PPNDPFSTKGTGF		0.01	0.069973	0.00777478	0.053415	0.005935	0.079077	0.00878633
Cac1			PPNDPFSTKGTGF		1	2.60534	0.289483	2.37963	0.264403	2.57181	0.285757
Cac1			PPNDPFSTKGTGF		10	4.64884	0.516538	4.23769	0.470855	4.81789	0.535322
Cac1			PPNDPFSTKGTGF		30	5.15797	0.573107	4.86675	0.54075	5.3312	0.592355
Cac1			PPNDPFSTKGTGF		60	5.73479	0.637199	5.05618	0.561798	5.56239	0.618044
Cac1	381	389	NYDYDSDVE	Phosphoryl STY (6)	0	0	0	0	0	0	0
Cac1			NYDYDSDVE	Phosphoryl STY (6)	0.01	0.053109	0.00663862	0.056877	0.00710962	0.063363	0.00792037
Cac1			NYDYDSDVE	Phosphoryl STY (6)	1	1.66966	0.208707	1.54407	0.193008	1.60726	0.200907
Cac1			NYDYDSDVE	Phosphoryl STY (6)	10	2.7516	0.34395	2.58311	0.322889	2.54414	0.318018
Cac1			NYDYDSDVE	Phosphoryl STY (6)	30	2.7313	0.341413	2.88191	0.360238	2.99079	0.373848
Cac1			NYDYDSDVE	Phosphoryl STY (6)	60	2.88515	0.360644	2.90947	0.363684	2.90436	0.363045
Cac1	389	402	EWVNEEEEGEVDNL		0	0	0	0	0	0	0
Cac1			EWVNEEEEGEVDNL		0.01	0.035384	0.00272185	0.034179	0.00262915	0.052696	0.00405354
Cac1			EWVNEEEEGEVDNL		1	5.31773	0.409056	5.9781	0.459854	5.35662	0.412048
Cac1			EWVNEEEEGEVDNL		10	6.12664	0.47128	6.3815	0.490885	5.72929	0.440715
Cac1			EWVNEEEEGEVDNL		30	6.13859	0.472199	6.33049	0.486961	6.34061	0.487739
Cac1			EWVNEEEEGEVDNL		60	5.97808	0.459852	6.48088	0.498529	6.16439	0.474184
Cac1	413	423	DDEDVPSEGEF	Phosphoryl STY (7)	0	0	0	0	0	0	0
Cac1			DDEDVPSEGEF	Phosphoryl STY (7)	0.01	0.05498	0.00610889	0.074067	0.00822967	0.068515	0.00761278
Cac1			DDEDVPSEGEF	Phosphoryl STY (7)	1	3.79996	0.422217	3.69375	0.410417	3.58873	0.398748
Cac1			DDEDVPSEGEF	Phosphoryl STY (7)	10	3.82864	0.425405	3.8419	0.426878	3.32613	0.36957
Cac1			DDEDVPSEGEF	Phosphoryl STY (7)	30	3.69652	0.410725	3.83427	0.42603	3.62588	0.402875
Cac1			DDEDVPSEGEF	Phosphoryl STY (7)	60	4.0181	0.446455	3.69928	0.411032	3.59328	0.399253
Cac1	424	435	DGFLDSEENSDL	Phosphoryl STY (10)	0	0	0	0	0	0	0
Cac1			DGFLDSEENSDL	Phosphoryl STY (10)	0.01	0.0861	0.00782727	0.143959	0.0130872	0.07927	0.00720636
Cac1			DGFLDSEENSDL	Phosphoryl STY (10)	1	4.72253	0.429321	4.12019	0.374563	3.90676	0.35516
Cac1			DGFLDSEENSDL	Phosphoryl STY (10)	10	4.59764	0.417968	4.73382	0.430347	4.66644	0.424222
Cac1			DGFLDSEENSDL	Phosphoryl STY (10)	30	4.64594	0.422358	4.80378	0.436707	4.55706	0.414278
Cac1			DGFLDSEENSDL	Phosphoryl STY (10)	60	4.88239	0.443854	4.78741	0.435219	4.68896	0.426269
Cac1	428	435	DSEENSDL		0	0	0	0	0	0	0
Cac1			DSEENSDL		0.01	0.039388	0.00562686	0.047943	0.006849	0.019349	0.00276414
Cac1			DSEENSDL		1	3.25945	0.465635	3.27364	0.467663	3.42847	0.489782
Cac1			DSEENSDL		10	3.22402	0.460575	3.49027	0.498609	3.50829	0.501185
Cac1			DSEENSDL		30	3.20865	0.458378	3.47626	0.496609	3.47264	0.496091
Cac1			DSEENSDL		60	3.19266	0.456095	3.41143	0.487346	3.41528	0.487898
Cac1	436	454	DGLPCAKRKFVGPLIPTIC		0	0	0	0	0	0	0
Cac1			DGLPCAKRKFVGPLIPTIC		0.01	0.032013	0.0021342	0.041274	0.0027516	0.026974	0.00179827
Cac1			DGLPCAKRKFVGPLIPTIC		1	7.94292	0.529528	8.13214	0.542143	8.03669	0.53578
Cac1			DGLPCAKRKFVGPLIPTIC		10	8.18318	0.545545	8.31836	0.554557	8.32469	0.55498
Cac1			DGLPCAKRKFVGPLIPTIC		30	8.36172	0.557448	8.56484	0.57099	8.55252	0.570168
Cac1			DGLPCAKRKFVGPLIPTIC		60	8.70976	0.58065	8.70324	0.580216	8.57418	0.571612
Cac1	436	455	DGLPCAKRKFVGPLIPTICL		0	0	0	0	0	0	0
Cac1			DGLPCAKRKFVGPLIPTICL		0.01	0.087293	0.00545581	0.105867	0.00661669	0.071963	0.00449769
Cac1			DGLPCAKRKFVGPLIPTICL		1	8.09853	0.506158	8.24309	0.515193	8.21151	0.51322
Cac1			DGLPCAKRKFVGPLIPTICL		10	8.76398	0.547749	8.99841	0.5624	9.02394	0.563996
Cac1			DGLPCAKRKFVGPLIPTICL		30	9.02361	0.563976	9.1426	0.571413	9.29805	0.581128
Cac1			DGLPCAKRKFVGPLIPTICL		60	9.40227	0.587642	9.35559	0.584724	9.24753	0.577971
Cac1	442	455	KRKFVGPLIPTICL		0	0	0	0	0	0	0
Cac1			KRKFVGPLIPTICL		0.01	0.04965	0.00451364	0.048278	0.00438891	0.053338	0.00484891
Cac1			KRKFVGPLIPTICL		1	5.05567	0.459606	5.09479	0.463162	4.91116	0.446469
Cac1			KRKFVGPLIPTICL		10	5.69001	0.517274	5.79644	0.526949	5.70727	0.518843
Cac1			KRKFVGPLIPTICL		30	6.03425	0.548568	6.05251	0.550228	5.85547	0.532316
Cac1			KRKFVGPLIPTICL		60	6.32585	0.575077	6.19089	0.562808	6.07245	0.552041
Cac1	463	473	SEENKRYLQQL		0	0	0	0	0	0	0
Cac1			SEENKRYLQQL		0.01	0.03959	0.003959	0.028392	0.0028392	0.047368	0.0047368
Cac1			SEENKRYLQQL		1	0.557347	0.0557347	0.497511	0.0497511	0.434958	0.0434958
Cac1			SEENKRYLQQL		10	0.857117	0.0857117	0.827602	0.0827602	0.721719	0.0721719
Cac1			SEENKRYLQQL		30	1.07795	0.107795	1.04718	0.104718	0.952286	0.0952286
Cac1			SEENKRYLQQL		60	1.29998	0.129998	1.09924	0.109924	1.05751	0.105751
Cac1	463	475	SEENKRYLQQLKA		0	0	0	0	0	0	0
Cac1			SEENKRYLQQLKA		0.01	0.018872	0.00157267	0.001279	0.000106583	0.022062	0.0018385
Cac1			SEENKRYLQQLKA		1	0.406931	0.0339109	0.365	0.0304167	0.373339	0.0311116
Cac1			SEENKRYLQQLKA		10	0.539297	0.0449414	0.577641	0.0481368	0.555932	0.0463277
Cac1			SEENKRYLQQLKA		30	0.691875	0.0576563	0.65156	0.0542966	0.682097	0.0568414
Cac1			SEENKRYLQQLKA		60	1.10469	0.0920577	0.796913	0.0664094	0.805447	0.0671206
Cac1	476	496	EVIIETDGPIDPFKEPKTSSL		0	0	0	0	0	0	0
Cac1			EVIIETDGPIDPFKEPKTSSL		0.01	0.048924	0.00287788	0.042907	0.00252394	0.034213	0.00201253
Cac1			EVIIETDGPIDPFKEPKTSSL		1	8.56231	0.503665	8.72956	0.513503	8.79129	0.517135
Cac1			EVIIETDGPIDPFKEPKTSSL		10	9.32079	0.548282	9.63324	0.566661	9.72621	0.57213
Cac1			EVIIETDGPIDPFKEPKTSSL		30	9.63691	0.566877	9.79438	0.57614	10.2075	0.600442
Cac1			EVIIETDGPIDPFKEPKTSSL		60	9.94637	0.58508	9.97607	0.586828	9.9856	0.587389
Cac1	477	496	VIIETDGPIDPFKEPKTSSL		0	0	0	0	0	0	0
Cac1			VIIETDGPIDPFKEPKTSSL		0.01	0.046309	0.00289431	0.040918	0.00255738	0.045341	0.00283381
Cac1			VIIETDGPIDPFKEPKTSSL		1	8.8487	0.553044	8.76095	0.54756	9.11561	0.569726
Cac1			VIIETDGPIDPFKEPKTSSL		10	9.46448	0.59153	9.59808	0.59988	9.76172	0.610108
Cac1			VIIETDGPIDPFKEPKTSSL		30	9.3825	0.586407	9.56851	0.598032	9.90067	0.618792
Cac1			VIIETDGPIDPFKEPKTSSL		60	9.48163	0.592602	9.53732	0.596083	9.62008	0.601255
Cac1	478	496	IIETDGPIDPFKEPKTSSL		0	0	0	0	0	0	0
Cac1			IIETDGPIDPFKEPKTSSL		0.01	0.099473	0.00663153	0.056083	0.00373887	0.050709	0.0033806
Cac1			IIETDGPIDPFKEPKTSSL		1	8.57429	0.571619	8.57414	0.571609	8.54021	0.569347
Cac1			IIETDGPIDPFKEPKTSSL		10	8.79448	0.586299	8.68135	0.578756	8.89132	0.592755
Cac1			IIETDGPIDPFKEPKTSSL		30	8.78807	0.585871	8.66099	0.577399	9.05163	0.603442
Cac1			IIETDGPIDPFKEPKTSSL		60	8.82341	0.588227	8.64289	0.576193	8.64954	0.576636
Cac1	479	496	IETDGPIDPFKEPKTSSL		0	0	0	0	0	0	0
Cac1			IETDGPIDPFKEPKTSSL		0.01	0.047352	0.00338229	0.039858	0.002847	0.080514	0.005751
Cac1			IETDGPIDPFKEPKTSSL		1	7.58803	0.542002	7.69114	0.549367	7.84828	0.560591
Cac1			IETDGPIDPFKEPKTSSL		10	7.97115	0.569368	7.94578	0.567556	8.04161	0.574401
Cac1			IETDGPIDPFKEPKTSSL		30	7.93596	0.566855	7.96974	0.569267	8.16151	0.582965
Cac1			IETDGPIDPFKEPKTSSL		60	7.80163	0.557259	7.9669	0.569064	7.76592	0.554709
Cac1	506	530	QAQTASQSQSPEKKQKAMITDPMDL	Phosphoryl STY (1)	0	0	0	0	0	0	0
Cac1			QAQTASQSQSPEKKQKAMITDPMDL	Phosphoryl STY (1)	0.01	0.045686	0.00207664	0.051136	0.00232436	0.042101	0.00191368
Cac1			QAQTASQSQSPEKKQKAMITDPMDL	Phosphoryl STY (1)	1	10.5946	0.481571	10.7221	0.487367	10.7106	0.486846
Cac1			QAQTASQSQSPEKKQKAMITDPMDL	Phosphoryl STY (1)	10	11.627	0.5285	11.727	0.533047	11.9101	0.541367
Cac1			QAQTASQSQSPEKKQKAMITDPMDL	Phosphoryl STY (1)	30	12.2107	0.555031	12.164	0.552909	12.687	0.576682
Cac1			QAQTASQSQSPEKKQKAMITDPMDL	Phosphoryl STY (1)	60	12.809	0.582228	12.6532	0.575145	12.5875	0.572159
Cac1	508	530	QTASQSQSPEKKQKAMITDPMDL	Phosphoryl STY (8)	0	0	0	0	0	0	0
Cac1			QTASQSQSPEKKQKAMITDPMDL	Phosphoryl STY (8)	0.01	0.035443	0.00177215	0.047187	0.00235935	0.02879	0.0014395
Cac1			QTASQSQSPEKKQKAMITDPMDL	Phosphoryl STY (8)	1	8.96484	0.448242	9.19494	0.459747	9.18534	0.459267
Cac1			QTASQSQSPEKKQKAMITDPMDL	Phosphoryl STY (8)	10	9.9038	0.49519	10.1603	0.508015	10.3847	0.519235
Cac1			QTASQSQSPEKKQKAMITDPMDL	Phosphoryl STY (8)	30	10.6611	0.533056	10.5797	0.528987	10.9867	0.549334
Cac1			QTASQSQSPEKKQKAMITDPMDL	Phosphoryl STY (8)	60	11.2891	0.564454	11.0602	0.553012	11.084	0.554201
Cac1	510	527	ASQSQSPEKKQKAMITDP	Acetyl K (12)	0	0	0	0	0	0	0
Cac1			ASQSQSPEKKQKAMITDP	Acetyl K (12)	0.01	0.042122	0.00280813	0.05239	0.00349267	0.050415	0.003361
Cac1			ASQSQSPEKKQKAMITDP	Acetyl K (12)	1	1.41899	0.0945994	1.40152	0.093435	1.37944	0.0919629
Cac1			ASQSQSPEKKQKAMITDP	Acetyl K (12)	10	2.6275	0.175166	2.57466	0.171644	2.74398	0.182932
Cac1			ASQSQSPEKKQKAMITDP	Acetyl K (12)	30	3.46226	0.230818	3.54097	0.236065	3.56393	0.237595
Cac1			ASQSQSPEKKQKAMITDP	Acetyl K (12)	60	4.14106	0.27607	3.98069	0.26538	4.01084	0.267389
Cac1	510	530	ASQSQSPEKKQKAMITDPMDL	Phosphoryl STY (1)	0	0	0	0	0	0	0
Cac1			ASQSQSPEKKQKAMITDPMDL	Phosphoryl STY (1)	0.01	0.073768	0.00409822	0.065352	0.00363067	0.090028	0.00500156
Cac1			ASQSQSPEKKQKAMITDPMDL	Phosphoryl STY (1)	1	7.57765	0.420981	7.82955	0.434975	7.73721	0.429845
Cac1			ASQSQSPEKKQKAMITDPMDL	Phosphoryl STY (1)	10	8.65213	0.480674	8.76066	0.486703	8.82711	0.490395
Cac1			ASQSQSPEKKQKAMITDPMDL	Phosphoryl STY (1)	30	9.08841	0.504911	9.24881	0.513823	9.68826	0.538237
Cac1			ASQSQSPEKKQKAMITDPMDL	Phosphoryl STY (1)	60	9.80424	0.54468	9.67042	0.537245	9.70194	0.538997
Cac1	523	530	MITDPMDL		0	0	0	0	0	0	0
Cac1			MITDPMDL		0.01	0.071188	0.0118647	0.051612	0.008602	0.053426	0.00890433
Cac1			MITDPMDL		1	1.41366	0.23561	1.35916	0.226526	1.37449	0.229082
Cac1			MITDPMDL		10	2.04516	0.34086	2.01609	0.336014	2.14071	0.356785
Cac1			MITDPMDL		30	2.3187	0.38645	2.32781	0.387968	2.35207	0.392012
Cac1			MITDPMDL		60	2.54492	0.424154	2.42368	0.403946	2.51524	0.419207
Cac1	524	530	ITDPMDL		0	0	0	0	0	0	0
Cac1			ITDPMDL		0.01	-0.114764	-0.0229528	-0.098466	-0.0196932	-0.07244	-0.014488
Cac1			ITDPMDL		1	0.371377	0.0742755	0.421556	0.0843112	0.437194	0.0874388
Cac1			ITDPMDL		10	0.966667	0.193333	1.1008	0.22016	1.11062	0.222124
Cac1			ITDPMDL		30	1.2902	0.25804	1.27918	0.255835	1.27443	0.254885
Cac1			ITDPMDL		60	1.37764	0.275529	1.3531	0.27062	1.40356	0.280712
Cac1	531	538	LRLFDGVQ		0	0	0	0	0	0	0
Cac1			LRLFDGVQ		0.01	0.042607	0.00608671	0.041793	0.00597043	0.047178	0.00673971
Cac1			LRLFDGVQ		1	0.552615	0.078945	0.572309	0.0817585	0.576143	0.0823062
Cac1			LRLFDGVQ		10	1.48539	0.212199	1.4835	0.211928	1.5288	0.2184
Cac1			LRLFDGVQ		30	1.91755	0.273935	1.93193	0.27599	1.93448	0.276355
Cac1			LRLFDGVQ		60	2.42737	0.346768	2.31679	0.33097	2.39799	0.34257
Cac1	531	542	LRLFDGVQDSTF		0	0	0	0	0	0	0
Cac1			LRLFDGVQDSTF		0.01	0.052217	0.004747	0.051115	0.00464682	0.031864	0.00289673
Cac1			LRLFDGVQDSTF		1	1.5234	0.138491	1.60782	0.146165	1.59344	0.144858
Cac1			LRLFDGVQDSTF		10	3.24277	0.294798	3.38026	0.307297	3.46653	0.315139
Cac1			LRLFDGVQDSTF		30	3.80141	0.345583	3.82734	0.34794	3.91573	0.355976
Cac1			LRLFDGVQDSTF		60	4.33619	0.394199	4.16134	0.378304	4.2265	0.384227
Cac1	534	542	FDGVQDSTF		0	0	0	0	0	0	0
Cac1			FDGVQDSTF		0.01	0.058349	0.00729363	0.050123	0.00626537	0.046436	0.0058045
Cac1			FDGVQDSTF		1	1.63312	0.20414	1.62501	0.203126	1.69375	0.211719
Cac1			FDGVQDSTF		10	3.40703	0.425879	3.4613	0.432662	3.61792	0.45224
Cac1			FDGVQDSTF		30	3.76329	0.470411	3.80458	0.475572	3.86301	0.482876
Cac1			FDGVQDSTF		60	4.00356	0.500445	3.88951	0.486188	3.97868	0.497336
Cac1	543	549	SLGTVTE		0	0	0	0	0	0	0
Cac1			SLGTVTE		0.01	0.028026	0.004671	0.031459	0.00524317	0.043446	0.007241
Cac1			SLGTVTE		1	1.45295	0.242158	1.47881	0.246468	1.51624	0.252707
Cac1			SLGTVTE		10	2.01549	0.335916	2.07585	0.345975	2.23577	0.372628
Cac1			SLGTVTE		30	2.91767	0.486278	2.91413	0.485688	2.99937	0.499896
Cac1			SLGTVTE		60	3.48243	0.580405	3.44632	0.574386	3.56539	0.594232
Cac1	550	569	IAQKNLPQYNKQTIKNTIKE		0	0	0	0	0	0	0
Cac1			IAQKNLPQYNKQTIKNTIKE		0.01	0.065207	0.00362261	0.066684	0.00370467	0.049788	0.002766
Cac1			IAQKNLPQYNKQTIKNTIKE		1	3.78656	0.210365	3.84918	0.213843	3.90025	0.216681
Cac1			IAQKNLPQYNKQTIKNTIKE		10	6.56608	0.364782	6.80246	0.377915	7.37941	0.409967
Cac1			IAQKNLPQYNKQTIKNTIKE		30	8.99134	0.499519	9.16982	0.509435	9.6774	0.537633
Cac1			IAQKNLPQYNKQTIKNTIKE		60	10.7311	0.596171	10.8258	0.601436	11.3695	0.631641
Cac1	551	569	AQKNLPQYNKQTIKNTIKE		0	0	0	0	0	0	0
Cac1			AQKNLPQYNKQTIKNTIKE		0.01	0.058089	0.003417	0.051572	0.00303365	0.036976	0.00217506
Cac1			AQKNLPQYNKQTIKNTIKE		1	3.62074	0.212985	3.69596	0.21741	3.79621	0.223306
Cac1			AQKNLPQYNKQTIKNTIKE		10	6.41047	0.377086	6.55163	0.38539	6.80469	0.400276
Cac1			AQKNLPQYNKQTIKNTIKE		30	8.68956	0.511151	8.8579	0.521053	9.22328	0.542546
Cac1			AQKNLPQYNKQTIKNTIKE		60	10.3533	0.609016	10.285	0.605002	10.9535	0.644322
Cac1	552	569	QKNLPQYNKQTIKNTIKE		0	0	0	0	0	0	0
Cac1			QKNLPQYNKQTIKNTIKE		0.01	-0.049452	-0.00309075	-0.050383	-0.00314894	-0.006413	-0.000400813
Cac1			QKNLPQYNKQTIKNTIKE		1	3.58491	0.224057	3.59842	0.224901	3.65976	0.228735
Cac1			QKNLPQYNKQTIKNTIKE		10	6.0051	0.375319	6.21628	0.388517	7.22341	0.451463
Cac1			QKNLPQYNKQTIKNTIKE		30	8.41943	0.526215	8.58738	0.536711	9.15279	0.572049
Cac1			QKNLPQYNKQTIKNTIKE		60	10.0911	0.630693	10.1519	0.634493	10.4799	0.654995
Cac1	553	569	KNLPQYNKQTIKNTIKE		0	0	0	0	0	0	0
Cac1			KNLPQYNKQTIKNTIKE		0.01	0.055728	0.0037152	0.059049	0.0039366	0.067458	0.0044972
Cac1			KNLPQYNKQTIKNTIKE		1	3.28934	0.21929	3.30241	0.220161	3.45552	0.230368
Cac1			KNLPQYNKQTIKNTIKE		10	5.7918	0.38612	6.02416	0.40161	6.32362	0.421575
Cac1			KNLPQYNKQTIKNTIKE		30	7.83285	0.52219	7.86648	0.524432	8.32377	0.554918
Cac1			KNLPQYNKQTIKNTIKE		60	9.44161	0.629441	9.6018	0.64012	9.91134	0.660756
Cac1	556	569	PQYNKQTIKNTIKE		0	0	0	0	0	0	0
Cac1			PQYNKQTIKNTIKE		0.01	0.008083	0.000673583	0.004893	0.00040775	0.10977	0.0091475
Cac1			PQYNKQTIKNTIKE		1	2.64092	0.220077	2.60856	0.21738	2.90732	0.242277
Cac1			PQYNKQTIKNTIKE		10	4.77337	0.397781	4.93623	0.411353	5.35176	0.44598
Cac1			PQYNKQTIKNTIKE		30	6.58556	0.548796	6.71309	0.559424	7.27541	0.606284
Cac1			PQYNKQTIKNTIKE		60	7.93531	0.661276	8.24901	0.687417	8.71438	0.726198
Cac1	570	591	YAIRSSGKGDLPRKWVIKDAQN		0	0	0	0	0	0	0
Cac1			YAIRSSGKGDLPRKWVIKDAQN		0.01	0.066632	0.0033316	0.068899	0.00344495	0.05273	0.0026365
Cac1			YAIRSSGKGDLPRKWVIKDAQN		1	7.63631	0.381815	7.8395	0.391975	7.87551	0.393776
Cac1			YAIRSSGKGDLPRKWVIKDAQN		10	8.63354	0.431677	9.076	0.4538	9.32592	0.466296
Cac1			YAIRSSGKGDLPRKWVIKDAQN		30	9.69597	0.484799	10.0188	0.500941	10.3715	0.518576
Cac1			YAIRSSGKGDLPRKWVIKDAQN		60	10.6559	0.532796	10.8416	0.542081	11.0509	0.552546
Cac1	596	606	RANANMPTPSL		0	0	0	0	0	0	0
Cac1			RANANMPTPSL		0.01	0.048308	0.0060385	0.05111	0.00638875	0.065089	0.00813613
Cac1			RANANMPTPSL		1	4.98166	0.622707	5.04155	0.630194	5.01449	0.626811
Cac1			RANANMPTPSL		10	5.02614	0.628267	5.04623	0.630778	4.99476	0.624345
Cac1			RANANMPTPSL		30	4.97183	0.621478	5.00619	0.625774	4.99259	0.624074
Cac1			RANANMPTPSL		60	5.03825	0.629781	5.02616	0.62827	4.96545	0.620681
Cac1	598	606	NANMPTPSL		0	0	0	0	0	0	0
Cac1			NANMPTPSL		0.01	0.047046	0.007841	0.060338	0.0100563	0.029722	0.00495367
Cac1			NANMPTPSL		1	3.59097	0.598494	3.83017	0.638361	3.7284	0.6214
Cac1			NANMPTPSL		10	3.64582	0.607637	3.94136	0.656894	3.67737	0.612896
Cac1			NANMPTPSL		30	3.55338	0.59223	3.8	0.633334	3.71655	0.619425
Cac1			NANMPTPSL		60	3.63231	0.605385	3.74989	0.624982	3.70164	0.616941

## Sheet: Cac2 plot
protein	amino acids		Sequence	modification	Time/min	tCAF-1		DMH3-H4•tCAF-1		WTH3-H4•tCAF-1
	start	end				Deut uptake	%Deut uptake	Deut uptake	%Deut uptake	Deut uptake	%Deut uptake
Cac2	7	17	QIYWHDSQPVY		0	0	0	0	0	0	0
Cac2		17	QIYWHDSQPVY		0.01	0.042594	0.00473267	0.049049	0.00544989	0.061189	0.00679878
Cac2		17	QIYWHDSQPVY		1	1.87228	0.208032	0.521288	0.0579209	0.400377	0.0444863
Cac2		17	QIYWHDSQPVY		10	2.00222	0.222469	1.04955	0.116617	1.31412	0.146013
Cac2		17	QIYWHDSQPVY		30	2.16091	0.240101	1.35936	0.15104	1.42159	0.157954
Cac2		17	QIYWHDSQPVY		60	2.29256	0.254729	1.45548	0.16172	1.70924	0.189916
Cac2	7	20	QIYWHDSQPVYSLT		0	0	0	0	0	0	0
Cac2	7	20	QIYWHDSQPVYSLT		0.01	0.065905	0.00549208	0.07297	0.00608083	0.05585	0.00465417
Cac2	7	20	QIYWHDSQPVYSLT		1	1.72503	0.143752	0.532142	0.0443452	0.363779	0.0303149
Cac2	7	20	QIYWHDSQPVYSLT		10	1.82076	0.15173	0.983621	0.0819684	1.24215	0.103512
Cac2	7	20	QIYWHDSQPVYSLT		30	1.96008	0.16334	1.24965	0.104138	1.24464	0.10372
Cac2	7	20	QIYWHDSQPVYSLT		60	2.12997	0.177497	1.37731	0.114776	1.57006	0.130838
Cac2	21	30	FQKNSANDKL		0	0	0	0	0	0	0
Cac2	21	30	FQKNSANDKL		0.01	0.014944	0.00166044	0.007128	0.000792	0.125039	0.0138932
Cac2	21	30	FQKNSANDKL		1	3.23914	0.359905	3.26411	0.362679	3.43644	0.381826
Cac2	21	30	FQKNSANDKL		10	3.31295	0.368105	3.46411	0.384902	3.65347	0.405941
Cac2	21	30	FQKNSANDKL		30	3.53981	0.393313	3.68328	0.409253	3.90455	0.433839
Cac2	21	30	FQKNSANDKL		60	3.78876	0.420973	3.81321	0.42369	4.04735	0.449706
Cac2	31	44	FTAGGDNKVRIWKL		0	0	0	0	0	0	0
Cac2	31	44	FTAGGDNKVRIWKL		0.01	0.035244	0.00271108	0.044679	0.00343685	0.006092	0.000468615
Cac2	31	44	FTAGGDNKVRIWKL		1	-0.00147567	-0.000113513	-0.0198586	-0.00152758	-0.0499711	-0.00384393
Cac2	31	44	FTAGGDNKVRIWKL		10	0.103088	0.00792987	0.171018	0.0131552	0.0906152	0.0069704
Cac2	31	44	FTAGGDNKVRIWKL		30	0.430256	0.0330966	0.350818	0.026986	0.336973	0.025921
Cac2	31	44	FTAGGDNKVRIWKL		60	0.651057	0.0500813	0.655821	0.0504477	0.60368	0.0464369
Cac2	33	44	AGGDNKVRIWKL		0	0	0	0	0	0	0
Cac2	33	44	AGGDNKVRIWKL		0.01	0.080062	0.00727836	0.078522	0.00713836	0.0667	0.00606364
Cac2	33	44	AGGDNKVRIWKL		1	-0.131716	-0.0119742	0.0744071	0.00676428	-0.0262835	-0.00238941
Cac2	33	44	AGGDNKVRIWKL		10	0.0157241	0.00142946	0.155082	0.0140983	0.146328	0.0133025
Cac2	33	44	AGGDNKVRIWKL		30	0.254183	0.0231076	0.393643	0.0357857	0.326079	0.0296436
Cac2	33	44	AGGDNKVRIWKL		60	0.457988	0.0416353	0.525358	0.0477598	0.554513	0.0504103
Cac2	34	44	GGDNKVRIWKL		0	0	0	0	0	0	0
Cac2	34	44	GGDNKVRIWKL		0.01	0.038691	0.0038691	0.030635	0.0030635	0.031168	0.0031168
Cac2	34	44	GGDNKVRIWKL		1	-0.0371642	-0.00371642	0.0356344	0.00356344	-0.0179608	-0.00179608
Cac2	34	44	GGDNKVRIWKL		10	0.0993992	0.00993992	0.142166	0.0142166	0.148877	0.0148877
Cac2	34	44	GGDNKVRIWKL		30	0.301479	0.0301479	0.349957	0.0349957	0.273375	0.0273375
Cac2	34	44	GGDNKVRIWKL		60	0.494674	0.0494674	0.521968	0.0521968	0.494197	0.0494197
Cac2	38	44	KVRIWKL		0	0	0	0	0	0	0
Cac2	38	44	KVRIWKL		0.01	0.040743	0.0067905	0.040208	0.00670133	0.061535	0.0102558
Cac2	38	44	KVRIWKL		1	0.0588905	0.00981509	0.0569122	0.00948537	0.0826467	0.0137745
Cac2	38	44	KVRIWKL		10	0.142784	0.0237973	0.17387	0.0289783	0.269912	0.0449853
Cac2	38	44	KVRIWKL		30	0.288674	0.0481123	0.385075	0.0641792	0.415924	0.0693207
Cac2	38	44	KVRIWKL		60	0.455698	0.0759497	0.548533	0.0914221	0.628354	0.104726
Cac2	38	61	KVRIWKLNRDENGQNGGVRKIESL		0	0	0	0	0	0	0
Cac2	38	61	KVRIWKLNRDENGQNGGVRKIESL		0.01	-0.012077	-0.000525087	-0.020406	-0.000887217	-0.027578	-0.00119904
Cac2	38	61	KVRIWKLNRDENGQNGGVRKIESL		1	7.52375	0.32712	7.39384	0.321471	7.2794	0.316496
Cac2	38	61	KVRIWKLNRDENGQNGGVRKIESL		10	9.15464	0.398028	9.40905	0.409089	9.54002	0.414783
Cac2	38	61	KVRIWKLNRDENGQNGGVRKIESL		30	9.67713	0.420745	9.9125	0.430978	10.2301	0.444787
Cac2	38	61	KVRIWKLNRDENGQNGGVRKIESL		60	9.97264	0.433593	9.96174	0.433119	10.0437	0.436683
Cac2	45	61	NRDENGQNGGVRKIESL		0	0	0	0	0	0	0
Cac2	45	61	NRDENGQNGGVRKIESL		0.01	0.049041	0.00306506	0.069432	0.0043395	0.053324	0.00333275
Cac2	45	61	NRDENGQNGGVRKIESL		1	7.97278	0.498298	7.47321	0.467076	7.35516	0.459698
Cac2	45	61	NRDENGQNGGVRKIESL		10	8.84028	0.552518	9.12995	0.570622	9.14878	0.571799
Cac2	45	61	NRDENGQNGGVRKIESL		30	9.36632	0.585395	9.09268	0.568293	9.38511	0.58657
Cac2	45	61	NRDENGQNGGVRKIESL		60	9.17989	0.573743	9.07686	0.567304	9.09465	0.568415
Cac2	45	62	NRDENGQNGGVRKIESLD		0	0	0	0	0	0	0
Cac2	45	62	NRDENGQNGGVRKIESLD		0.01	-0.022597	-0.00132924	-0.041819	-0.00245994	-0.013589	-0.000799353
Cac2	45	62	NRDENGQNGGVRKIESLD		1	7.78116	0.457715	7.50223	0.441307	7.51642	0.442142
Cac2	45	62	NRDENGQNGGVRKIESLD		10	9.14333	0.537843	9.3021	0.547183	9.44956	0.555857
Cac2	45	62	NRDENGQNGGVRKIESLD		30	9.35915	0.550538	9.25759	0.544564	9.46864	0.556979
Cac2	45	62	NRDENGQNGGVRKIESLD		60	9.34133	0.54949	9.20184	0.541285	9.20963	0.541743
Cac2	62	75	DFLGSLTHHEQAIN		0	0	0	0	0	0	0
Cac2	62	75	DFLGSLTHHEQAIN		0.01	0.041621	0.00320162	0.051632	0.00397169	0.066265	0.00509731
Cac2	62	75	DFLGSLTHHEQAIN		1	1.69091	0.13007	1.53074	0.117749	1.47141	0.113186
Cac2	62	75	DFLGSLTHHEQAIN		10	2.42748	0.186729	2.15936	0.166105	2.22262	0.170971
Cac2	62	75	DFLGSLTHHEQAIN		30	2.81238	0.216337	2.57754	0.198272	2.52916	0.194551
Cac2	62	75	DFLGSLTHHEQAIN		60	3.24141	0.249339	2.68381	0.206447	2.6363	0.202792
Cac2	62	76	DFLGSLTHHEQAINV		0	0	0	0	0	0	0
Cac2	62	76	DFLGSLTHHEQAINV		0.01	0.051355	0.00366821	0.058564	0.00418314	0.034934	0.00249529
Cac2	62	76	DFLGSLTHHEQAINV		1	1.65718	0.11837	1.52139	0.10867	1.47989	0.105707
Cac2	62	76	DFLGSLTHHEQAINV		10	2.3729	0.169493	2.07787	0.14842	2.08403	0.148859
Cac2	62	76	DFLGSLTHHEQAINV		30	2.73906	0.195647	2.42107	0.172933	2.4008	0.171486
Cac2	62	76	DFLGSLTHHEQAINV		60	3.09808	0.221291	2.60814	0.186296	2.51706	0.17979
Cac2	63	75	FLGSLTHHEQAIN		0	0	0	0	0	0	0
Cac2	63	75	FLGSLTHHEQAIN		0.01	0.052425	0.00436875	0.062219	0.00518492	0.037688	0.00314067
Cac2	63	75	FLGSLTHHEQAIN		1	1.19756	0.0997966	1.10269	0.0918911	1.04904	0.0874199
Cac2	63	75	FLGSLTHHEQAIN		10	1.8536	0.154466	1.67068	0.139223	1.63261	0.136051
Cac2	63	75	FLGSLTHHEQAIN		30	2.28994	0.190829	1.95698	0.163082	2.01179	0.167649
Cac2	63	75	FLGSLTHHEQAIN		60	2.56956	0.21413	2.09768	0.174806	2.04092	0.170076
Cac2	63	76	FLGSLTHHEQAINV		0	0	0	0	0	0	0
Cac2	63	76	FLGSLTHHEQAINV		0.01	0.012129	0.000933	0.018474	0.00142108	-0.037457	-0.00288131
Cac2	63	76	FLGSLTHHEQAINV		1	1.23637	0.0951052	0.986248	0.0758652	0.981869	0.0755284
Cac2	63	76	FLGSLTHHEQAINV		10	1.83615	0.141243	1.43863	0.110664	1.47473	0.11344
Cac2	63	76	FLGSLTHHEQAINV		30	2.01096	0.154689	1.77085	0.136219	1.77372	0.13644
Cac2	63	76	FLGSLTHHEQAINV		60	2.25776	0.173674	1.88273	0.144826	1.78013	0.136933
Cac2	64	75	LGSLTHHEQAIN		0	0	0	0	0	0	0
Cac2	64	75	LGSLTHHEQAIN		0.01	0.049652	0.00451382	0.064574	0.00587036	0.058265	0.00529682
Cac2	64	75	LGSLTHHEQAIN		1	1.63536	0.148669	1.49149	0.13559	1.50527	0.136843
Cac2	64	75	LGSLTHHEQAIN		10	2.25169	0.204699	2.10936	0.19176	2.08911	0.189919
Cac2	64	75	LGSLTHHEQAIN		30	2.66318	0.242107	2.33624	0.212386	2.30353	0.209411
Cac2	64	75	LGSLTHHEQAIN		60	3.05027	0.277297	2.49525	0.226841	2.41099	0.219181
Cac2	76	86	VIRFNSKGDVL		0	0	0	0	0	0	0
Cac2	76	86	VIRFNSKGDVL		0.01	0.056217	0.0056217	0.053541	0.0053541	0.043036	0.0043036
Cac2	76	86	VIRFNSKGDVL		1	1.17678	0.117678	1.21043	0.121043	1.14897	0.114897
Cac2	76	86	VIRFNSKGDVL		10	1.82088	0.182088	1.93529	0.193529	1.94482	0.194482
Cac2	76	86	VIRFNSKGDVL		30	2.09578	0.209578	2.1692	0.21692	2.20041	0.220041
Cac2	76	86	VIRFNSKGDVL		60	2.27285	0.227285	2.2785	0.22785	2.25473	0.225473
Cac2	77	86	IRFNSKGDVL		0	0	0	0	0	0	0
Cac2	77	86	IRFNSKGDVL		0.01	0.047775	0.00530833	0.060908	0.00676756	0.060556	0.00672844
Cac2	77	86	IRFNSKGDVL		1	1.18726	0.131918	1.18026	0.13114	1.24962	0.138847
Cac2	77	86	IRFNSKGDVL		10	1.81684	0.201871	1.92317	0.213686	1.9679	0.218656
Cac2	77	86	IRFNSKGDVL		30	2.17304	0.241449	2.19702	0.244113	2.18475	0.242751
Cac2	77	86	IRFNSKGDVL		60	2.30214	0.255793	2.36953	0.263281	2.38438	0.264931
Cac2	87	96	ASAGDDGQVL		0	0	0	0	0	0	0
Cac2	87	96	ASAGDDGQVL		0.01	0.045413	0.00504589	0.038567	0.00428522	0.0278	0.00308889
Cac2	87	96	ASAGDDGQVL		1	0.223286	0.0248095	0.257293	0.0285881	0.265307	0.0294786
Cac2	87	96	ASAGDDGQVL		10	1.22264	0.135848	1.37353	0.152615	1.49364	0.16596
Cac2	87	96	ASAGDDGQVL		30	1.97398	0.219331	2.03941	0.226601	1.98799	0.220888
Cac2	87	96	ASAGDDGQVL		60	2.43288	0.270319	2.40543	0.267269	2.49408	0.27712
Cac2	87	97	ASAGDDGQVLL		0	0	0	0	0	0	0
Cac2	87	97	ASAGDDGQVLL		0.01	0.067397	0.0067397	0.065571	0.0065571	0.06351	0.006351
Cac2	87	97	ASAGDDGQVLL		1	0.108764	0.0108764	0.220712	0.0220712	0.221228	0.0221228
Cac2	87	97	ASAGDDGQVLL		10	1.19018	0.119018	1.37661	0.137661	1.47005	0.147005
Cac2	87	97	ASAGDDGQVLL		30	1.98301	0.198301	1.99889	0.199889	1.94948	0.194948
Cac2	87	97	ASAGDDGQVLL		60	2.33978	0.233978	2.39858	0.239858	2.5157	0.25157
Cac2	97	108	LWKQEDPNTQQE		0	0	0	0	0	0	0
Cac2	97	108	LWKQEDPNTQQE		0.01	0.006398	0.0006398	-0.025851	-0.0025851	-0.013635	-0.0013635
Cac2	97	108	LWKQEDPNTQQE		1	4.39505	0.439505	4.48111	0.448111	4.349	0.4349
Cac2	97	108	LWKQEDPNTQQE		10	4.65529	0.465529	4.80553	0.480553	4.51532	0.451532
Cac2	97	108	LWKQEDPNTQQE		30	4.96013	0.496013	5.18405	0.518405	4.97809	0.497809
Cac2	97	108	LWKQEDPNTQQE		60	5.21288	0.521288	5.25355	0.525355	5.40769	0.540769
Cac2	108	117	ESVVRPFGMD		0	0	0	0	0	0	0
Cac2	108	117	ESVVRPFGMD		0.01	0.033082	0.00413525	-0.001582	-0.00019775	0.04584	0.00573
Cac2	108	117	ESVVRPFGMD		1	4.98195	0.622744	4.95266	0.619083	5.03825	0.629782
Cac2	108	117	ESVVRPFGMD		10	4.94589	0.618236	4.9838	0.622975	5.08417	0.635521
Cac2	108	117	ESVVRPFGMD		30	4.97415	0.621769	4.96078	0.620098	5.0526	0.631575
Cac2	108	117	ESVVRPFGMD		60	5.03724	0.629655	4.97939	0.622423	5.02317	0.627896
Cac2	109	117	SVVRPFGMD		0	0	0	0	0	0	0
Cac2	109	117	SVVRPFGMD		0.01	0.02099	0.00299857	0.02583	0.00369	-0.003363	-0.000480429
Cac2	109	117	SVVRPFGMD		1	4.34752	0.621075	4.34622	0.620889	4.36349	0.623356
Cac2	109	117	SVVRPFGMD		10	4.36856	0.62408	4.37303	0.624719	4.42921	0.632744
Cac2	109	117	SVVRPFGMD		30	4.34877	0.621252	4.37827	0.625467	4.48929	0.641327
Cac2	109	117	SVVRPFGMD		60	4.38653	0.626648	4.33527	0.619325	4.34909	0.621299
Cac2	118	130	AETSEADENKEKW		0	0	0	0	0	0	0
Cac2	118	130	AETSEADENKEKW		0.01	-0.020167	-0.00168058	-0.021776	-0.00181467	-0.025513	-0.00212608
Cac2	118	130	AETSEADENKEKW		1	5.90887	0.492406	5.82219	0.485182	5.75726	0.479772
Cac2	118	130	AETSEADENKEKW		10	6.36528	0.53044	6.40801	0.534001	6.4435	0.536958
Cac2	118	130	AETSEADENKEKW		30	6.41336	0.534447	6.37512	0.53126	6.56087	0.546739
Cac2	118	130	AETSEADENKEKW		60	6.47868	0.53989	6.53637	0.544697	6.48098	0.540082
Cac2	123	144	ADENKEKWVVWKRLRGGSGATA		0	0	0	0	0	0	0
Cac2	123	144	ADENKEKWVVWKRLRGGSGATA		0.01	0.054456	0.00259314	0.063409	0.00301948	0.091073	0.00433681
Cac2	123	144	ADENKEKWVVWKRLRGGSGATA		1	7.70893	0.367092	8.02958	0.382361	7.80326	0.371584
Cac2	123	144	ADENKEKWVVWKRLRGGSGATA		10	8.71032	0.414777	9.01254	0.429169	8.9495	0.426167
Cac2	123	144	ADENKEKWVVWKRLRGGSGATA		30	9.15681	0.436038	9.44182	0.449611	9.44913	0.449958
Cac2	123	144	ADENKEKWVVWKRLRGGSGATA		60	9.5089	0.452805	9.50033	0.452397	9.25772	0.440844
Cac2	123	147	ADENKEKWVVWKRLRGGSGATAAAE		0	0	0	0	0	0	0
Cac2	123	147	ADENKEKWVVWKRLRGGSGATAAAE		0.01	0.052801	0.00220004	0.034261	0.00142754	0.055028	0.00229283
Cac2	123	147	ADENKEKWVVWKRLRGGSGATAAAE		1	9.38813	0.391172	9.43191	0.392996	9.41203	0.392168
Cac2	123	147	ADENKEKWVVWKRLRGGSGATAAAE		10	10.2992	0.429132	10.6383	0.44326	10.6339	0.443078
Cac2	123	147	ADENKEKWVVWKRLRGGSGATAAAE		30	10.9941	0.458088	10.9208	0.455032	11.194	0.466417
Cac2	123	147	ADENKEKWVVWKRLRGGSGATAAAE		60	11.2154	0.467309	11.0633	0.46097	11.0239	0.459327
Cac2	131	144	VVWKRLRGGSGATA		0	0	0	0	0	0	0
Cac2	131	144	VVWKRLRGGSGATA		0.01	-0.001978	-0.000152154	-0.019305	-0.001485	0.015494	0.00119185
Cac2	131	144	VVWKRLRGGSGATA		1	5.73297	0.440997	5.82767	0.448282	5.7886	0.445277
Cac2	131	144	VVWKRLRGGSGATA		10	5.78686	0.445143	5.87911	0.452239	5.90175	0.453981
Cac2	131	144	VVWKRLRGGSGATA		30	5.74704	0.44208	5.8407	0.449285	5.92644	0.45588
Cac2	131	144	VVWKRLRGGSGATA		60	5.85709	0.450545	5.88719	0.452861	5.81738	0.447491
Cac2	131	145	VVWKRLRGGSGATAA		0	0	0	0	0	0	0
Cac2	131	145	VVWKRLRGGSGATAA		0.01	0.04357	0.00311214	0.023728	0.00169486	0.077615	0.00554393
Cac2	131	145	VVWKRLRGGSGATAA		1	6.64584	0.474703	6.65844	0.475603	6.56811	0.469151
Cac2	131	145	VVWKRLRGGSGATAA		10	6.60416	0.471726	6.64505	0.474646	6.77228	0.483734
Cac2	131	145	VVWKRLRGGSGATAA		30	6.64549	0.474678	6.4873	0.463378	6.7758	0.483985
Cac2	131	145	VVWKRLRGGSGATAA		60	6.7791	0.484222	6.65098	0.47507	6.67717	0.47694
Cac2	148	159	IYDLAWSPDNRN		0	0	0	0	0	0	0
Cac2	148	159	IYDLAWSPDNRN		0.01	0.015233	0.0015233	0.011827	0.0011827	-0.003855	-0.0003855
Cac2	148	159	IYDLAWSPDNRN		1	0.258987	0.0258987	0.401204	0.0401204	0.299861	0.0299861
Cac2	148	159	IYDLAWSPDNRN		10	0.851206	0.0851206	0.89125	0.089125	0.90039	0.090039
Cac2	148	159	IYDLAWSPDNRN		30	1.34953	0.134953	1.42922	0.142922	1.40998	0.140998
Cac2	148	159	IYDLAWSPDNRN		60	1.83874	0.183874	1.76145	0.176145	1.75029	0.175029
Cac2	149	159	YDLAWSPDNRN		0	0	0	0	0	0	0
Cac2	149	159	YDLAWSPDNRN		0.01	0.043634	0.00484822	0.077197	0.00857744	0.020868	0.00231867
Cac2	149	159	YDLAWSPDNRN		1	0.296122	0.0329025	0.436238	0.0484709	0.346385	0.0384872
Cac2	149	159	YDLAWSPDNRN		10	0.821617	0.0912908	0.981876	0.109097	0.953443	0.105938
Cac2	149	159	YDLAWSPDNRN		30	1.44694	0.160771	1.49959	0.166621	1.49663	0.166293
Cac2	149	159	YDLAWSPDNRN		60	1.84346	0.204829	1.83491	0.203879	1.76888	0.196542
Cac2	151	159	LAWSPDNRN		0	0	0	0	0	0	0
Cac2	151	159	LAWSPDNRN		0.01	0.029244	0.00417771	0.009916	0.00141657	0.071406	0.0102009
Cac2	151	159	LAWSPDNRN		1	0.386471	0.0552102	0.401235	0.0573192	0.442729	0.063247
Cac2	151	159	LAWSPDNRN		10	1.00848	0.144069	0.98187	0.140267	1.14084	0.162976
Cac2	151	159	LAWSPDNRN		30	1.64403	0.234861	1.56045	0.222921	1.67354	0.239077
Cac2	151	159	LAWSPDNRN		60	2.16023	0.308605	1.92734	0.275334	2.09338	0.299054
Cac2	152	159	AWSPDNRN		0	0	0	0	0	0	0
Cac2	152	159	AWSPDNRN		0.01	0.052454	0.00874233	0.063773	0.0106288	0.032715	0.0054525
Cac2	152	159	AWSPDNRN		1	0.480233	0.0800389	0.51093	0.085155	0.528246	0.088041
Cac2	152	159	AWSPDNRN		10	1.0292	0.171533	1.10798	0.184663	1.109	0.184833
Cac2	152	159	AWSPDNRN		30	1.59593	0.265989	1.64853	0.274756	1.49158	0.248597
Cac2	152	159	AWSPDNRN		60	2.02408	0.337347	1.86247	0.310412	1.90971	0.318286
Cac2	172	178	FDVGAGM		0	0	0	0	0	0	0
Cac2	172	178	FDVGAGM		0.01	0.068855	0.0114758	0.066783	0.0111305	0.04957	0.00826167
Cac2	172	178	FDVGAGM		1	1.76564	0.294273	1.77246	0.295409	1.76644	0.294407
Cac2	172	178	FDVGAGM		10	2.2394	0.373234	2.33463	0.389104	2.33298	0.38883
Cac2	172	178	FDVGAGM		30	2.53552	0.422586	2.58098	0.430164	2.55201	0.425335
Cac2	172	178	FDVGAGM		60	2.65775	0.442958	2.67074	0.445124	2.69185	0.448641
Cac2	172	179	FDVGAGML		0	0	0	0	0	0	0
Cac2	172	179	FDVGAGML		0.01	0.034157	0.00487957	0.037169	0.00530986	0.06625	0.00946429
Cac2	172	179	FDVGAGML		1	2.52882	0.361261	2.5058	0.357971	2.52242	0.360346
Cac2	172	179	FDVGAGML		10	2.92389	0.417699	3.03425	0.433464	3.06272	0.437531
Cac2	172	179	FDVGAGML		30	3.33633	0.476619	3.39661	0.48523	3.29169	0.470241
Cac2	172	179	FDVGAGML		60	3.52735	0.503907	3.45359	0.49337	3.57426	0.510608
Cac2	179	192	LVCGQSDHGHYVQG		0	0	0	0	0	0	0
Cac2	179	192	LVCGQSDHGHYVQG		0.01	0.0505	0.00388462	0.050601	0.00389238	0.038532	0.002964
Cac2	179	192	LVCGQSDHGHYVQG		1	1.33174	0.102441	1.51447	0.116497	1.52541	0.117339
Cac2	179	192	LVCGQSDHGHYVQG		10	2.04628	0.157406	2.12936	0.163797	1.80891	0.139147
Cac2	179	192	LVCGQSDHGHYVQG		30	2.44195	0.187842			2.58548	0.198883
Cac2	179	192	LVCGQSDHGHYVQG		60	2.66414	0.204934	2.64832	0.203717	2.64077	0.203136
Cac2	179	200	LVCGQSDHGHYVQGVAWDPLNQ		0	0	0	0	0	0	0
Cac2	179	200	LVCGQSDHGHYVQGVAWDPLNQ		0.01	0.060857	0.00304285	0.05919	0.0029595	0.049414	0.0024707
Cac2	179	200	LVCGQSDHGHYVQGVAWDPLNQ		1	1.13309	0.0566546	1.11326	0.0556631	1.04247	0.0521234
Cac2	179	200	LVCGQSDHGHYVQGVAWDPLNQ		10	2.06802	0.103401	1.77996	0.088998	1.83261	0.0916306
Cac2	179	200	LVCGQSDHGHYVQGVAWDPLNQ		30	2.66723	0.133362	2.55647	0.127824	2.50022	0.125011
Cac2	179	200	LVCGQSDHGHYVQGVAWDPLNQ		60	3.00283	0.150141	2.75879	0.137939	2.72027	0.136014
Cac2	179	201	LVCGQSDHGHYVQGVAWDPLNQF		0	0	0	0	0	0	0
Cac2	179	201	LVCGQSDHGHYVQGVAWDPLNQF		0.01	0.116772	0.00556057	0.107993	0.00514252	0.077709	0.00370043
Cac2	179	201	LVCGQSDHGHYVQGVAWDPLNQF		1	1.00233	0.0477302	1.11909	0.0532898	1.1327	0.053938
Cac2	179	201	LVCGQSDHGHYVQGVAWDPLNQF		10	1.7362	0.0826763	1.80304	0.0858588	2.03683	0.0969919
Cac2	179	201	LVCGQSDHGHYVQGVAWDPLNQF		30	2.36119	0.112437	2.57962	0.122839	2.35005	0.111907
Cac2	179	201	LVCGQSDHGHYVQGVAWDPLNQF		60	2.61088	0.124328	2.71821	0.129438	2.74403	0.130668
Cac2	180	200	VCGQSDHGHYVQGVAWDPLNQ		0	0	0	0	0	0	0
Cac2	180	200	VCGQSDHGHYVQGVAWDPLNQ		0.01	0.072403	0.00381068	0.061343	0.00322858	0.760883	0.0400465
Cac2	180	200	VCGQSDHGHYVQGVAWDPLNQ		1	0.73921	0.0389058	0.884222	0.046538	1.2404	0.0652843
Cac2	180	200	VCGQSDHGHYVQGVAWDPLNQ		10	1.44516	0.0760613	1.52878	0.080462	1.93454	0.101818
Cac2	180	200	VCGQSDHGHYVQGVAWDPLNQ		30	2.07174	0.109039	2.08677	0.10983	2.51233	0.132228
Cac2	180	200	VCGQSDHGHYVQGVAWDPLNQ		60	2.27682	0.119832	2.21609	0.116636	2.58675	0.136145
Cac2	180	201	VCGQSDHGHYVQGVAWDPLNQF		0	0	0	0	0	0	0
Cac2	180	201	VCGQSDHGHYVQGVAWDPLNQF		0.01	0.031706	0.0015853	0.024105	0.00120525	0.584938	0.0292469
Cac2	180	201	VCGQSDHGHYVQGVAWDPLNQF		1	0.59669	0.0298345	0.660518	0.0330259	0.932848	0.0466424
Cac2	180	201	VCGQSDHGHYVQGVAWDPLNQF		10	1.06073	0.0530366	1.20611	0.0603056	1.61387	0.0806935
Cac2	180	201	VCGQSDHGHYVQGVAWDPLNQF		30	1.84362	0.092181	1.81373	0.0906867	2.18775	0.109388
Cac2	180	201	VCGQSDHGHYVQGVAWDPLNQF		60	1.94826	0.0974132	1.88153	0.0940765	2.14034	0.107017
Cac2	193	200	VAWDPLNQ		0	0	0	0	0	0	0
Cac2	193	200	VAWDPLNQ		0.01	0.05664	0.00944	0.04985	0.00830833	0.274385	0.0457308
Cac2	193	200	VAWDPLNQ		1	0.115237	0.0192062	0.0929787	0.0154964	0.199304	0.0332174
Cac2	193	200	VAWDPLNQ		10	0.423556	0.0705926	0.400627	0.0667711	0.508853	0.0848089
Cac2	193	200	VAWDPLNQ		30	0.742375	0.123729	0.754599	0.125767	0.785815	0.130969
Cac2	193	200	VAWDPLNQ		60	0.873043	0.145507	0.863869	0.143978	0.948881	0.158147
Cac2	193	201	VAWDPLNQF		0	0	0	0	0	0	0
Cac2	193	201	VAWDPLNQF		0.01	0.05351	0.00764429	0.066759	0.009537	0.044703	0.00638614
Cac2	193	201	VAWDPLNQF		1	0.0682597	0.00975139	0.103297	0.0147567	0.0373965	0.00534236
Cac2	193	201	VAWDPLNQF		10	0.353625	0.0505179	0.39231	0.0560443	0.400577	0.0572253
Cac2	193	201	VAWDPLNQF		30	0.691041	0.0987202	0.691941	0.0988488	0.659245	0.0941779
Cac2	193	201	VAWDPLNQF		60	0.77555	0.110793	0.86186	0.123123	0.86949	0.124213
Cac2	201	207	FILSQSA		0	0	0	0	0	0	0
Cac2	201	207	FILSQSA		0.01	0.022205	0.00370083	0.023316	0.003886	0.013817	0.00230283
Cac2	201	207	FILSQSA		1	0.0675583	0.0112597	0.0957749	0.0159625	0.115109	0.0191848
Cac2	201	207	FILSQSA		10	0.116669	0.0194449	0.0969918	0.0161653	0.124835	0.0208058
Cac2	201	207	FILSQSA		30	0.198298	0.0330496	0.174371	0.0290618	0.127489	0.0212481
Cac2	201	207	FILSQSA		60	0.187627	0.0312712	0.145878	0.024313	0.112433	0.0187388
Cac2	201	211	FILSQSADRSL		0	0	0	0	0	0	0
Cac2	201	211	FILSQSADRSL		0.01	-0.211843	-0.0211843	0.078524	0.0078524	0.090373	0.0090373
Cac2	201	211	FILSQSADRSL		1	-0.25423	-0.025423	0.155023	0.0155023	0.338042	0.0338042
Cac2	201	211	FILSQSADRSL		10	-0.165374	-0.0165374	0.18859	0.018859	0.411947	0.0411947
Cac2	201	211	FILSQSADRSL		30	-0.0308578	-0.00308578	0.236762	0.0236762	0.420881	0.0420881
Cac2	201	211	FILSQSADRSL		60	0.163992	0.0163992	0.277984	0.0277984	0.339611	0.0339611
Cac2	201	213	FILSQSADRSLHV		0	0	0	0	0	0	0
Cac2	201	213	FILSQSADRSLHV		0.01	0.043778	0.00364817	0.044564	0.00371367	0.043721	0.00364342
Cac2	201	213	FILSQSADRSLHV		1	0.131837	0.0109864	0.19771	0.0164759	0.141909	0.0118257
Cac2	201	213	FILSQSADRSLHV		10	0.292038	0.0243365	0.277084	0.0230904	0.291512	0.0242927
Cac2	201	213	FILSQSADRSLHV		30	0.404148	0.033679	0.30963	0.0258025	0.250042	0.0208368
Cac2	201	213	FILSQSADRSLHV		60	0.572641	0.0477201	0.385558	0.0321299	0.273777	0.0228148
Cac2	201	214	FILSQSADRSLHVY		0	0	0	0	0	0	0
Cac2	201	214	FILSQSADRSLHVY		0.01	0.015078	0.00115985	0.005925	0.000455769	-0.015283	-0.00117562
Cac2	201	214	FILSQSADRSLHVY		1	0.158892	0.0122225	0.151391	0.0116454	0.119859	0.00921995
Cac2	201	214	FILSQSADRSLHVY		10	0.312511	0.0240393	0.238496	0.0183458	0.186284	0.0143295
Cac2	201	214	FILSQSADRSLHVY		30	0.545964	0.0419972	0.268677	0.0206675	0.219008	0.0168468
Cac2	201	214	FILSQSADRSLHVY		60	0.62175	0.0478269	0.394184	0.0303218	0.239759	0.018443
Cac2	201	215	FILSQSADRSLHVYG		0	0	0	0	0	0	0
Cac2	201	215	FILSQSADRSLHVYG		0.01	0.024255	0.0017325	0.043074	0.00307671	0.028175	0.0020125
Cac2	201	215	FILSQSADRSLHVYG		1	0.230358	0.0164541	0.296301	0.0211644	0.216304	0.0154503
Cac2	201	215	FILSQSADRSLHVYG		10	0.23123	0.0165164	0.378021	0.0270015	0.278959	0.0199256
Cac2	201	215	FILSQSADRSLHVYG		30	0.697812	0.0498437	0.444979	0.0317842	0.261415	0.0186725
Cac2	201	215	FILSQSADRSLHVYG		60	0.806067	0.0575762	0.514151	0.0367251	0.303158	0.0216541
Cac2	201	218	FILSQSADRSLHVYGVIL		0	0	0	0	0	0	0
Cac2	201	218	FILSQSADRSLHVYGVIL		0.01	0.033529	0.00197229	0.039792	0.00234071	0.046555	0.00273853
Cac2	201	218	FILSQSADRSLHVYGVIL		1	0.468628	0.0275663	0.485677	0.0285692	0.405532	0.0238548
Cac2	201	218	FILSQSADRSLHVYGVIL		10	0.975965	0.0574097	0.994544	0.0585026	1.00315	0.0590087
Cac2	201	218	FILSQSADRSLHVYGVIL		30	1.28142	0.0753776	1.19203	0.0701193	0.893731	0.0525724
Cac2	201	218	FILSQSADRSLHVYGVIL		60	1.46627	0.0862514	1.27651	0.0750887	1.14629	0.0674286
Cac2	202	213	ILSQSADRSLHV		0	0	0	0	0	0	0
Cac2	202	213	ILSQSADRSLHV		0.01	-0.021124	-0.00192036	-0.001535	-0.000139545	-0.04213	-0.00383
Cac2	202	213	ILSQSADRSLHV		1	-0.0526641	-0.00478764	-0.0855193	-0.00777448	-0.0482013	-0.00438193
Cac2	202	213	ILSQSADRSLHV		10	0.133376	0.0121251	-0.154911	-0.0140828	-0.0662665	-0.00602422
Cac2	202	213	ILSQSADRSLHV		30	0.0118997	0.00108179	-0.0446016	-0.00405469	-0.315955	-0.0287232
Cac2	202	213	ILSQSADRSLHV		60	0.168616	0.0153287	-0.00226907	-0.000206279	-0.112449	-0.0102226
Cac2	202	215	ILSQSADRSLHVYG		0	0	0	0	0	0	0
Cac2	202	215	ILSQSADRSLHVYG		0.01	-0.017765	-0.00136654	0.008034	0.000618	0.022191	0.001707
Cac2	202	215	ILSQSADRSLHVYG		1	0.184209	0.0141699	0.206604	0.0158926	0.112244	0.00863412
Cac2	202	215	ILSQSADRSLHVYG		10	0.333985	0.0256912	0.214756	0.0165197	0.0803173	0.00617826
Cac2	202	215	ILSQSADRSLHVYG		30	0.512144	0.0393957	0.300996	0.0231535	0.103289	0.00794531
Cac2	202	215	ILSQSADRSLHVYG		60	0.567928	0.0436868	0.344521	0.0265016	0.111297	0.00856129
Cac2	202	218	ILSQSADRSLHVYGVIL		0	0	0	0	0	0	0
Cac2	202	218	ILSQSADRSLHVYGVIL		0.01	0.014749	0.000921813	0.033019	0.00206369	0.048094	0.00300587
Cac2	202	218	ILSQSADRSLHVYGVIL		1	0.48207	0.0301294	0.455718	0.0284824	0.432901	0.0270563
Cac2	202	218	ILSQSADRSLHVYGVIL		10	1.05814	0.0661341	1.01543	0.0634645	1.05243	0.0657769
Cac2	202	218	ILSQSADRSLHVYGVIL		30	1.36345	0.0852157	1.15606	0.0722536	1.01767	0.0636042
Cac2	202	218	ILSQSADRSLHVYGVIL		60	1.54334	0.0964589	1.33457	0.0834106	1.25252	0.0782826
Cac2	208	218	DRSLHVYGVIL		0	0	0	0	0	0	0
Cac2	208	218	DRSLHVYGVIL		0.01	0.067203	0.0067203	0.062302	0.0062302	0.074715	0.0074715
Cac2	208	218	DRSLHVYGVIL		1	0.48191	0.048191	0.427412	0.0427412	0.384254	0.0384254
Cac2	208	218	DRSLHVYGVIL		10	1.00734	0.100734	0.946589	0.0946589	0.913568	0.0913568
Cac2	208	218	DRSLHVYGVIL		30	1.08949	0.108949	1.08757	0.108757	0.947726	0.0947726
Cac2	208	218	DRSLHVYGVIL		60	1.16613	0.116613	1.08345	0.108345	1.15492	0.115492
Cac2	209	218	RSLHVYGVIL		0	0	0	0	0	0	0
Cac2	209	218	RSLHVYGVIL		0.01	0.060074	0.00667489	0.080415	0.008935	0.078682	0.00874244
Cac2	209	218	RSLHVYGVIL		1	0.450363	0.0500404	0.537468	0.0597186	0.418196	0.0464663
Cac2	209	218	RSLHVYGVIL		10	0.900741	0.100082	0.881264	0.0979182	0.885434	0.0983816
Cac2	209	218	RSLHVYGVIL		30	1.30373	0.144859	1.15479	0.12831	0.954481	0.106053
Cac2	209	218	RSLHVYGVIL		60	1.33639	0.148488	1.21394	0.134882	1.12761	0.12529
Cac2	211	231	LHVYGVILSSAGVVTGLKLRS	Phosphoryl STY (1)	0	0	0	0	0	0	0
Cac2	211	231	LHVYGVILSSAGVVTGLKLRS	Phosphoryl STY (1)	0.01	-0.040627	-0.00203135	-0.051836	-0.0025918	-0.034872	-0.0017436
Cac2	211	231	LHVYGVILSSAGVVTGLKLRS	Phosphoryl STY (1)	1	3.99227	0.199613	3.88864	0.194432	3.95343	0.197672
Cac2	211	231	LHVYGVILSSAGVVTGLKLRS	Phosphoryl STY (1)	10	4.26255	0.213127	4.08029	0.204015	4.25586	0.212793
Cac2	211	231	LHVYGVILSSAGVVTGLKLRS	Phosphoryl STY (1)	30	4.81899	0.240949	4.53949	0.226974	4.77731	0.238865
Cac2	211	231	LHVYGVILSSAGVVTGLKLRS	Phosphoryl STY (1)	60	4.97013	0.248507	4.94967	0.247483	4.82503	0.241251
Cac2	216	229	VILSSAGVVTGLKL		0	0	0	0	0	0	0
Cac2	216	229	VILSSAGVVTGLKL		0.01	0.07412	0.00570154	0.100554	0.00773492	0.051095	0.00393038
Cac2	216	229	VILSSAGVVTGLKL		1	3.27495	0.251919	3.39462	0.261125	3.33776	0.256751
Cac2	216	229	VILSSAGVVTGLKL		10	5.11398	0.393383	5.14965	0.396127	5.47964	0.421511
Cac2	216	229	VILSSAGVVTGLKL		30	6.28343	0.483341	6.40259	0.492507	6.6196	0.5092
Cac2	216	229	VILSSAGVVTGLKL		60	6.62892	0.509917	6.86997	0.528459	6.75423	0.519556
Cac2	219	229	SSAGVVTGLKL		0	0	0	0	0	0	0
Cac2	219	229	SSAGVVTGLKL		0.01	0.062036	0.0062036	0.057288	0.0057288	0.030857	0.0030857
Cac2	219	229	SSAGVVTGLKL		1	2.02095	0.202095	2.08631	0.208631	1.98983	0.198983
Cac2	219	229	SSAGVVTGLKL		10	3.28833	0.328833	3.59773	0.359773	3.50895	0.350895
Cac2	219	229	SSAGVVTGLKL		30	4.31369	0.431369	4.39959	0.439959	4.14873	0.414873
Cac2	219	229	SSAGVVTGLKL		60	4.62573	0.462573	4.75189	0.475189	4.69488	0.469488
Cac2	227	245	LKLRSKIAKAELPCPGDVL		0	0	0	0	0	0	0
Cac2	227	245	LKLRSKIAKAELPCPGDVL		0.01	0.061624	0.0038515	0.065118	0.00406988	0.044153	0.00275956
Cac2	227	245	LKLRSKIAKAELPCPGDVL		1	7.42744	0.464215	7.5216	0.4701	7.47443	0.467152
Cac2	227	245	LKLRSKIAKAELPCPGDVL		10	8.29092	0.518182	8.43577	0.527236	8.45984	0.52874
Cac2	227	245	LKLRSKIAKAELPCPGDVL		30	8.68302	0.542688	8.77928	0.548705	8.93461	0.558413
Cac2	227	245	LKLRSKIAKAELPCPGDVL		60	9.06828	0.566768	8.91407	0.557129	8.89347	0.555842
Cac2	230	245	RSKIAKAELPCPGDVL		0	0	0	0	0	0	0
Cac2	230	245	RSKIAKAELPCPGDVL		0.01	0.03205	0.00246538	0.041365	0.00318192	0.065337	0.00502592
Cac2	230	245	RSKIAKAELPCPGDVL		1	6.70352	0.515655	6.86083	0.527756	6.8716	0.528585
Cac2	230	245	RSKIAKAELPCPGDVL		10	7.42566	0.571205	7.68912	0.591471	7.73697	0.595152
Cac2	230	245	RSKIAKAELPCPGDVL		30	7.5673	0.5821	7.77204	0.597849	7.89016	0.606935
Cac2	230	245	RSKIAKAELPCPGDVL		60	7.8462	0.603554	7.83176	0.602443	7.81623	0.601249
Cac2	246	256	RTNYLFHNETL		0	0	0	0	0	0	0
Cac2	246	256	RTNYLFHNETL		0.01	-0.106881	-0.0106881	-0.114021	-0.0114021	-0.062126	-0.0062126
Cac2	246	256	RTNYLFHNETL		1	1.73468	0.173468	1.43465	0.143465	1.50472	0.150472
Cac2	246	256	RTNYLFHNETL		10	2.9528	0.29528	2.35867	0.235867	2.33728	0.233728
Cac2	246	256	RTNYLFHNETL		30	3.65321	0.365321	2.59304	0.259304	2.57052	0.257052
Cac2	246	256	RTNYLFHNETL		60	3.7983	0.37983	2.81009	0.281009	2.90302	0.290302
Cac2	260	271	FRRCSISPCGGL		0	0	0	0	0	0	0
Cac2	260	271	FRRCSISPCGGL		0.01	0.091405	0.0091405	0.073644	0.0073644	0.0821	0.00821
Cac2	260	271	FRRCSISPCGGL		1	0.659196	0.0659196	0.704366	0.0704366	0.616691	0.0616691
Cac2	260	271	FRRCSISPCGGL		10	1.66855	0.166855	1.7526	0.17526	1.71109	0.171109
Cac2	260	271	FRRCSISPCGGL		30	2.13849	0.213849	2.17203	0.217203	2.16135	0.216135
Cac2	260	271	FRRCSISPCGGL		60	2.21329	0.221329	2.18075	0.218075	2.16765	0.216765
Cac2	271	278	LVVIPSGV		0	0	0	0	0	0	0
Cac2	271	278	LVVIPSGV		0.01	-0.004771	-0.000795167	0.003132	0.000522	-0.006469	-0.00107817
Cac2	271	278	LVVIPSGV		1	0.0814288	0.0135715	0.039265	0.00654416	0.0246666	0.00411109
Cac2	271	278	LVVIPSGV		10	0.303494	0.0505824	0.0674941	0.011249	0.0643172	0.0107195
Cac2	271	278	LVVIPSGV		30	0.551016	0.0918361	0.138646	0.0231076	-0.0911278	-0.015188
Cac2	271	278	LVVIPSGV		60	0.888403	0.148067	0.181965	0.0303275	0.0691742	0.011529
Cac2	279	287	YKVAGDEVA		0	0	0	0	0	0	0
Cac2	279	287	YKVAGDEVA		0.01	0.041479	0.00518488	0.034266	0.00428325	0.028569	0.00357113
Cac2	279	287	YKVAGDEVA		1	3.88323	0.485403	3.83411	0.479264	3.85464	0.481831
Cac2	279	287	YKVAGDEVA		10	4.4926	0.561575	4.69807	0.587259	4.63437	0.579296
Cac2	279	287	YKVAGDEVA		30	4.63914	0.579892	4.84544	0.60568	4.98916	0.623645
Cac2	279	287	YKVAGDEVA		60	4.89393	0.611741	4.88793	0.610992	4.829	0.603625
Cac2	279	289	YKVAGDEVANC		0	0	0	0	0	0	0
Cac2	279	289	YKVAGDEVANC		0.01	0.034619	0.0034619	0.040242	0.0040242	0.01713	0.001713
Cac2	279	289	YKVAGDEVANC		1	3.64748	0.364748	3.70141	0.370141	3.70613	0.370613
Cac2	279	289	YKVAGDEVANC		10	4.5913	0.45913	4.881	0.4881	4.79132	0.479132
Cac2	279	289	YKVAGDEVANC		30	5.28369	0.528369	5.42718	0.542718	5.31135	0.531135
Cac2	279	289	YKVAGDEVANC		60	5.38296	0.538296	5.54481	0.554481	5.40765	0.540765
Cac2	290	299	VYVYTRSGIL		0	0	0	0	0	0	0
Cac2	290	299	VYVYTRSGIL		0.01	-0.064232	-0.00713689	-0.029505	-0.00327833	-0.084486	-0.00938733
Cac2	290	299	VYVYTRSGIL		1	0.25215	0.0280167	0.32667	0.0362967	0.262675	0.0291861
Cac2	290	299	VYVYTRSGIL		10	0.75315	0.0836834	0.857942	0.0953269	0.865778	0.0961976
Cac2	290	299	VYVYTRSGIL		30	1.29521	0.143912	1.27109	0.141232	1.21777	0.135308
Cac2	290	299	VYVYTRSGIL		60	1.42987	0.158874	1.49203	0.165781	1.4581	0.162011
Cac2	292	299	VYTRSGIL		0	0	0	0	0	0	0
Cac2	292	299	VYTRSGIL		0.01	0.055529	0.00793271	0.051695	0.007385	0.023451	0.00335014
Cac2	292	299	VYTRSGIL		1	0.623601	0.0890859	0.608763	0.0869661	0.605651	0.0865215
Cac2	292	299	VYTRSGIL		10	1.16873	0.166962	1.2025	0.171785	1.26463	0.180662
Cac2	292	299	VYTRSGIL		30	1.61921	0.231316	1.66899	0.238427	1.69054	0.241506
Cac2	292	299	VYTRSGIL		60	1.85393	0.264847	1.86907	0.26701	1.84311	0.263301
Cac2	293	299	YTRSGIL		0	0	0	0	0	0	0
Cac2	293	299	YTRSGIL		0.01	0.022674	0.003779	0.020835	0.0034725	-0.013675	-0.00227917
Cac2	293	299	YTRSGIL		1	0.612948	0.102158	0.632105	0.105351	0.529016	0.0881694
Cac2	293	299	YTRSGIL		10	1.02061	0.170102	1.10214	0.18369	1.03447	0.172411
Cac2	293	299	YTRSGIL		30	1.25395	0.208992	1.32145	0.220241	1.30305	0.217174
Cac2	293	299	YTRSGIL		60	1.3852	0.230866	1.48003	0.246672	1.33927	0.223212
Cac2	300	321	NSAGGVKNRPAIRIPSLKKPAL		0	0	0	0	0	0	0
Cac2	300	321	NSAGGVKNRPAIRIPSLKKPAL		0.01	0.06274	0.00348556	0.055332	0.003074	0.038057	0.00211428
Cac2	300	321	NSAGGVKNRPAIRIPSLKKPAL		1	4.12525	0.229181	4.13698	0.229832	4.12565	0.229203
Cac2	300	321	NSAGGVKNRPAIRIPSLKKPAL		10	4.73784	0.263213	4.87279	0.270711	4.81857	0.267698
Cac2	300	321	NSAGGVKNRPAIRIPSLKKPAL		30	5.35805	0.29767	5.3726	0.298478	5.40028	0.300016
Cac2	300	321	NSAGGVKNRPAIRIPSLKKPAL		60	5.70717	0.317065	5.57804	0.309891	5.474	0.304111
Cac2	300	322	NSAGGVKNRPAIRIPSLKKPALM		0	0	0	0	0	0	0
Cac2	300	322	NSAGGVKNRPAIRIPSLKKPALM		0.01	0.081348	0.00428147	0.0771	0.00405789	0.052158	0.00274516
Cac2	300	322	NSAGGVKNRPAIRIPSLKKPALM		1	4.0859	0.215047	4.08668	0.215088	4.06359	0.213873
Cac2	300	322	NSAGGVKNRPAIRIPSLKKPALM		10	4.64453	0.244449	4.79505	0.252371	4.77796	0.251472
Cac2	300	322	NSAGGVKNRPAIRIPSLKKPALM		30	5.3233	0.280173	5.33278	0.280673	5.31221	0.27959
Cac2	300	322	NSAGGVKNRPAIRIPSLKKPALM		60	5.67643	0.29876	5.52464	0.29077	5.42834	0.285702
Cac2	301	322	SAGGVKNRPAIRIPSLKKPALM		0	0	0	0	0	0	0
Cac2	301	322	SAGGVKNRPAIRIPSLKKPALM		0.01	-0.224939	-0.0124966	-0.212842	-0.0118246	-0.099976	-0.00555422
Cac2	301	322	SAGGVKNRPAIRIPSLKKPALM		1	3.18858	0.177144	3.30438	0.183576	3.335	0.185278
Cac2	301	322	SAGGVKNRPAIRIPSLKKPALM		10	3.72113	0.206729	4.00413	0.222452	4.05152	0.225085
Cac2	301	322	SAGGVKNRPAIRIPSLKKPALM		30	4.3209	0.24005	4.49295	0.249608	4.50598	0.250332
Cac2	301	322	SAGGVKNRPAIRIPSLKKPALM		60	4.46075	0.24782	4.70144	0.261191	4.6968	0.260933
Cac2	302	322	AGGVKNRPAIRIPSLKKPALM		0	0	0	0	0	0	0
Cac2	302	322	AGGVKNRPAIRIPSLKKPALM		0.01	0.026999	0.00158818	0.038637	0.00227276	0.016674	0.000980824
Cac2	302	322	AGGVKNRPAIRIPSLKKPALM		1	3.46698	0.20394	3.49181	0.205401	3.7624	0.221318
Cac2	302	322	AGGVKNRPAIRIPSLKKPALM		10	3.95318	0.23254	4.05936	0.238786	4.00413	0.235537
Cac2	302	322	AGGVKNRPAIRIPSLKKPALM		30	4.59449	0.270264	4.62016	0.271774	4.61519	0.271482
Cac2	302	322	AGGVKNRPAIRIPSLKKPALM		60	4.86068	0.285922	4.73804	0.278708	4.84928	0.285252
Cac2	303	321	GGVKNRPAIRIPSLKKPAL		0	0	0	0	0	0	0
Cac2	303	321	GGVKNRPAIRIPSLKKPAL		0.01	0.057323	0.00382153	0.056572	0.00377147	0.053258	0.00355053
Cac2	303	321	GGVKNRPAIRIPSLKKPAL		1	3.55954	0.237303	3.51854	0.234569	3.5095	0.233967
Cac2	303	321	GGVKNRPAIRIPSLKKPAL		10	4.08741	0.272494	4.17992	0.278661	4.15069	0.276713
Cac2	303	321	GGVKNRPAIRIPSLKKPAL		30	4.70342	0.313561	4.68363	0.312242	4.71075	0.31405
Cac2	303	321	GGVKNRPAIRIPSLKKPAL		60	5.04313	0.336209	4.87378	0.324918	4.82422	0.321615
Cac2	303	322	GGVKNRPAIRIPSLKKPALM		0	0	0	0	0	0	0
Cac2	303	322	GGVKNRPAIRIPSLKKPALM		0.01	-0.00053	-3.3125e-05	-0.023276	-0.00145475	0.011247	0.000702937
Cac2	303	322	GGVKNRPAIRIPSLKKPALM		1	3.46486	0.216553	3.43294	0.214559	3.42459	0.214037
Cac2	303	322	GGVKNRPAIRIPSLKKPALM		10	3.90931	0.244332	3.98021	0.248763	4.03876	0.252422
Cac2	303	322	GGVKNRPAIRIPSLKKPALM		30	4.62694	0.289184	4.42342	0.276464	4.56316	0.285197
Cac2	303	322	GGVKNRPAIRIPSLKKPALM		60	4.83694	0.302309	4.64127	0.290079	4.62127	0.28883
Cac2	322	329	MAAFSPVF		0	0	0	0	0	0	0
Cac2	322	329	MAAFSPVF		0.01	0.024598	0.00409967	0.071324	0.0118873	-0.002167	-0.000361167
Cac2	322	329	MAAFSPVF		1	0.765639	0.127606	0.759858	0.126643	0.659222	0.10987
Cac2	322	329	MAAFSPVF		10	0.731	0.121833	0.786629	0.131105	0.639634	0.106606
Cac2	322	329	MAAFSPVF		30	0.778155	0.129692	0.85387	0.142312	0.648755	0.108126
Cac2	322	329	MAAFSPVF		60	0.791236	0.131873	0.807004	0.134501	0.740676	0.123446
Cac2	323	329	AAFSPVF		0	0	0	0	0	0	0
Cac2	323	329	AAFSPVF		0.01	0.041986	0.0083972	0.042107	0.0084214	0.063694	0.0127388
Cac2	323	329	AAFSPVF		1	0.663657	0.132731	0.667847	0.133569	0.698554	0.139711
Cac2	323	329	AAFSPVF		10	0.662942	0.132588	0.702389	0.140478	0.728806	0.145761
Cac2	323	329	AAFSPVF		30	0.684241	0.136848	0.715237	0.143047	0.750275	0.150055
Cac2	323	329	AAFSPVF		60	0.711318	0.142264	0.700522	0.140104	0.75135	0.15027
Cac2	330	346	YETCQKSVLKLPYKLVF		0	0	0	0	0	0	0
Cac2	330	346	YETCQKSVLKLPYKLVF		0.01	0.061025	0.00406833	0.052297	0.00348647	0.048422	0.00322813
Cac2	330	346	YETCQKSVLKLPYKLVF		1	3.13487	0.208992	3.13046	0.208698	3.2002	0.213347
Cac2	330	346	YETCQKSVLKLPYKLVF		10	3.98008	0.265339	4.22486	0.281658	4.25293	0.283529
Cac2	330	346	YETCQKSVLKLPYKLVF		30	4.54767	0.303178	4.70449	0.313632	4.78651	0.319101
Cac2	330	346	YETCQKSVLKLPYKLVF		60	4.79104	0.319402	4.81721	0.321147	4.81651	0.3211
Cac2	331	346	ETCQKSVLKLPYKLVF		0	0	0	0	0	0	0
Cac2	331	346	ETCQKSVLKLPYKLVF		0.01	0.081438	0.005817	0.11321	0.00808643	0.1187	0.00847857
Cac2	331	346	ETCQKSVLKLPYKLVF		1	2.73072	0.195052	2.83466	0.202475	2.84131	0.202951
Cac2	331	346	ETCQKSVLKLPYKLVF		10	3.18904	0.227789	3.57684	0.255488	3.53228	0.252306
Cac2	331	346	ETCQKSVLKLPYKLVF		30	3.6785	0.26275	4.15274	0.296625	3.97368	0.283835
Cac2	331	346	ETCQKSVLKLPYKLVF		60	3.9519	0.282279	4.22101	0.301501	4.09401	0.292429
Cac2	334	346	QKSVLKLPYKLVF		0	0	0	0	0	0	0
Cac2	334	346	QKSVLKLPYKLVF		0.01	0.009013	0.000819364	0.015166	0.00137873	0.039965	0.00363318
Cac2	334	346	QKSVLKLPYKLVF		1	1.86387	0.169443	1.8328	0.166618	1.93711	0.176101
Cac2	334	346	QKSVLKLPYKLVF		10	2.48628	0.226025	2.51253	0.228412	2.60113	0.236467
Cac2	334	346	QKSVLKLPYKLVF		30	2.96531	0.269574	2.90191	0.26381	2.95539	0.268672
Cac2	334	346	QKSVLKLPYKLVF		60	3.16715	0.287923	3.12786	0.284351	3.19533	0.290484
Cac2	335	346	KSVLKLPYKLVF		0	0	0	0	0	0	0
Cac2	335	346	KSVLKLPYKLVF		0.01	0.06261	0.006261	0.056183	0.0056183	0.060522	0.0060522
Cac2	335	346	KSVLKLPYKLVF		1	1.59507	0.159507	1.62232	0.162232	1.60658	0.160658
Cac2	335	346	KSVLKLPYKLVF		10	2.19099	0.219099	2.28269	0.228269	2.33513	0.233513
Cac2	335	346	KSVLKLPYKLVF		30	2.67278	0.267278	2.73162	0.273162	2.72866	0.272866
Cac2	335	346	KSVLKLPYKLVF		60	2.88345	0.288345	2.88061	0.288061	2.91733	0.291733
Cac2	336	346	SVLKLPYKLVF		0	0	0	0	0	0	0
Cac2	336	346	SVLKLPYKLVF		0.01	0.073018	0.00811311	0.061398	0.006822	0.091238	0.0101376
Cac2	336	346	SVLKLPYKLVF		1	1.32824	0.147582	1.38874	0.154304	1.3736	0.152622
Cac2	336	346	SVLKLPYKLVF		10	1.83869	0.204299	1.96381	0.218201	2.02353	0.224837
Cac2	336	346	SVLKLPYKLVF		30	2.19399	0.243777	2.36872	0.263191	2.41567	0.268408
Cac2	336	346	SVLKLPYKLVF		60	2.48118	0.275686	2.51328	0.279253	2.55683	0.284093
Cac2	337	346	VLKLPYKLVF		0	0	0	0	0	0	0
Cac2	337	346	VLKLPYKLVF		0.01	0.092853	0.0116066	0.081017	0.0101271	0.069103	0.00863788
Cac2	337	346	VLKLPYKLVF		1	1.06025	0.132531	1.03695	0.129619	1.03238	0.129048
Cac2	337	346	VLKLPYKLVF		10	1.51651	0.189564	1.62259	0.202824	1.64444	0.205555
Cac2	337	346	VLKLPYKLVF		30	1.69865	0.212332	1.70959	0.213699	1.77852	0.222315
Cac2	337	346	VLKLPYKLVF		60	1.66523	0.208154	1.73319	0.216649	1.77244	0.221555
Cac2	338	349	LKLPYKLVFAIA	Acetyl K (6)	0	0	0	0	0	0	0
Cac2	338	349	LKLPYKLVFAIA	Acetyl K (6)	0.01	-0.034817	-0.0034817	-0.020321	-0.0020321	-0.01128	-0.001128
Cac2	338	349	LKLPYKLVFAIA	Acetyl K (6)	1	1.27465	0.127465	1.29223	0.129223	1.37476	0.137476
Cac2	338	349	LKLPYKLVFAIA	Acetyl K (6)	10	1.84732	0.184732	1.88608	0.188608	1.991	0.1991
Cac2	338	349	LKLPYKLVFAIA	Acetyl K (6)	30	2.24736	0.224736	2.29724	0.229724	2.32415	0.232415
Cac2	338	349	LKLPYKLVFAIA	Acetyl K (6)	60	2.38938	0.238938	2.4362	0.24362	2.50293	0.250293
Cac2	347	355	AIATTNEVL		0	0	0	0	0	0	0
Cac2	347	355	AIATTNEVL		0.01	0.057049	0.00713113	0.053607	0.00670087	0.057051	0.00713138
Cac2	347	355	AIATTNEVL		1	0.0520126	0.00650157	0.0617219	0.00771524	0.0424385	0.00530481
Cac2	347	355	AIATTNEVL		10	0.217827	0.0272283	0.21037	0.0262962	0.205373	0.0256716
Cac2	347	355	AIATTNEVL		30	0.525165	0.0656457	0.433881	0.0542351	0.389469	0.0486836
Cac2	347	355	AIATTNEVL		60	0.696994	0.0871243	0.604039	0.0755049	0.600943	0.0751179
Cac2	354	360	VLVYDTD		0	0	0	0	0	0	0
Cac2	354	360	VLVYDTD		0.01	-0.104894	-0.0174823	-0.078383	-0.0130638	-0.049935	-0.0083225
Cac2	354	360	VLVYDTD		1	-0.263891	-0.0439819	-0.2611	-0.0435167	-0.128199	-0.0213664
Cac2	354	360	VLVYDTD		10	-0.250568	-0.0417613	-0.283631	-0.0472719	-0.087533	-0.0145888
Cac2	354	360	VLVYDTD		30	-0.240411	-0.0400686	-0.263728	-0.0439546	-0.101096	-0.0168494
Cac2	354	360	VLVYDTD		60	-0.248985	-0.0414975	-0.274982	-0.0458304	-0.114555	-0.0190925
Cac2	356	367	VYDTDVLEPLCV		0	0	0	0	0	0	0
Cac2	356	367	VYDTDVLEPLCV		0.01	0.069054	0.0069054	0.077658	0.0077658	0.074769	0.0074769
Cac2	356	367	VYDTDVLEPLCV		1	0.207884	0.0207884	0.209352	0.0209352	0.177115	0.0177115
Cac2	356	367	VYDTDVLEPLCV		10	0.693906	0.0693906	0.762311	0.0762311	0.72971	0.072971
Cac2	356	367	VYDTDVLEPLCV		30	1.15134	0.115134	1.1944	0.11944	1.17982	0.117982
Cac2	356	367	VYDTDVLEPLCV		60	1.39277	0.139277	1.42667	0.142667	1.44866	0.144866
Cac2	360	366	DVLEPLC		0	0	0	0	0	0	0
Cac2	360	366	DVLEPLC		0.01	0.001465	0.000293	0.088976	0.0177952	-0.008067	-0.0016134
Cac2	360	366	DVLEPLC		1	0.1516	0.0303199	0.123216	0.0246432	0.0849995	0.0169999
Cac2	360	366	DVLEPLC		10	0.524672	0.104934	0.447018	0.0894036	0.434909	0.0869819
Cac2	360	366	DVLEPLC		30	0.671497	0.134299	0.694722	0.138944	0.772304	0.154461
Cac2	360	366	DVLEPLC		60	0.741431	0.148286	0.759593	0.151919	0.677333	0.135467
Cac2	360	367	DVLEPLCV		0	0	0	0	0	0	0
Cac2	360	367	DVLEPLCV		0.01	0.061853	0.0103088	0.041782	0.00696367	0.064199	0.0106998
Cac2	360	367	DVLEPLCV		1	0.130658	0.0217763	0.122737	0.0204562	0.13261	0.0221017
Cac2	360	367	DVLEPLCV		10	0.504086	0.0840143	0.526742	0.0877904	0.599004	0.099834
Cac2	360	367	DVLEPLCV		30	0.790752	0.131792	0.828536	0.138089	0.786798	0.131133
Cac2	360	367	DVLEPLCV		60	0.848932	0.141489	0.833443	0.138907	0.82795	0.137992
Cac2	361	367	VLEPLCV		0	0	0	0	0	0	0
Cac2	361	367	VLEPLCV		0.01	0.081795	0.016359	0.077946	0.0155892	0.059152	0.0118304
Cac2	361	367	VLEPLCV		1	0.118651	0.0237301	0.121735	0.0243471	0.0825687	0.0165137
Cac2	361	367	VLEPLCV		10	0.134308	0.0268615	0.130604	0.0261207	0.113249	0.0226497
Cac2	361	367	VLEPLCV		30	0.188628	0.0377256	0.152715	0.030543	0.125514	0.0251029
Cac2	361	367	VLEPLCV		60	0.178097	0.0356194	0.17936	0.0358721	0.130276	0.0260552
Cac2	367	378	VVGNIHYSPITD		0	0	0	0	0	0	0
Cac2	367	378	VVGNIHYSPITD		0.01	0.035499	0.0035499	0.039076	0.0039076	0.030571	0.0030571
Cac2	367	378	VVGNIHYSPITD		1	0.431037	0.0431037	0.207631	0.0207631	0.196011	0.0196011
Cac2	367	378	VVGNIHYSPITD		10	1.06213	0.106213	0.827917	0.0827917	0.808372	0.0808372
Cac2	367	378	VVGNIHYSPITD		30	1.37122	0.137122	1.03624	0.103624	0.963751	0.0963751
Cac2	367	378	VVGNIHYSPITD		60	1.61006	0.161006	1.19172	0.119172	1.1508	0.11508
Cac2	367	379	VVGNIHYSPITDL		0	0	0	0	0	0	0
Cac2	367	379	VVGNIHYSPITDL		0.01	0.060171	0.00547009	0.052422	0.00476564	0.049206	0.00447327
Cac2	367	379	VVGNIHYSPITDL		1	0.421616	0.0383287	0.291408	0.0264916	0.217823	0.0198021
Cac2	367	379	VVGNIHYSPITDL		10	1.02779	0.0934354	0.804388	0.0731261	0.786883	0.0715349
Cac2	367	379	VVGNIHYSPITDL		30	1.35943	0.123585	1.05925	0.0962953	0.938155	0.0852868
Cac2	367	379	VVGNIHYSPITDL		60	1.54515	0.140468	1.17191	0.106537	1.12462	0.102238
Cac2	367	380	VVGNIHYSPITDLA		0	0	0	0	0	0	0
Cac2	367	380	VVGNIHYSPITDLA		0.01	0.046018	0.00383483	0.030361	0.00253008	0.021449	0.00178742
Cac2	367	380	VVGNIHYSPITDLA		1	0.387859	0.0323216	0.312768	0.026064	0.101993	0.00849945
Cac2	367	380	VVGNIHYSPITDLA		10	0.904987	0.0754156	0.780285	0.0650237	0.642342	0.0535285
Cac2	367	380	VVGNIHYSPITDLA		30	1.22096	0.101747	1.03002	0.0858354	0.849895	0.0708246
Cac2	367	380	VVGNIHYSPITDLA		60	1.57152	0.13096	1.17246	0.0977052	1.02881	0.085734
Cac2	368	378	VGNIHYSPITD		0	0	0	0	0	0	0
Cac2	368	378	VGNIHYSPITD		0.01	0.065353	0.00726144	0.064219	0.00713544	0.044461	0.00494011
Cac2	368	378	VGNIHYSPITD		1	0.233682	0.0259646	0.244082	0.0271202	0.0887268	0.00985854
Cac2	368	378	VGNIHYSPITD		10	0.686461	0.0762735	0.601034	0.0667816	0.429972	0.0477746
Cac2	368	378	VGNIHYSPITD		30	0.980854	0.108984	0.765886	0.0850984	0.600731	0.0667479
Cac2	368	378	VGNIHYSPITD		60	1.10623	0.122914	0.858599	0.0953999	0.714083	0.0793425
Cac2	368	379	VGNIHYSPITDL		0	0	0	0	0	0	0
Cac2	368	379	VGNIHYSPITDL		0.01	0.055568	0.0055568	0.051642	0.0051642	0.023818	0.0023818
Cac2	368	379	VGNIHYSPITDL		1	0.221217	0.0221217	0.149053	0.0149053	0.0858017	0.00858017
Cac2	368	379	VGNIHYSPITDL		10	0.614294	0.0614294	0.410048	0.0410048	0.374659	0.0374659
Cac2	368	379	VGNIHYSPITDL		30	0.905837	0.0905837	0.580369	0.0580369	0.513702	0.0513702
Cac2	368	379	VGNIHYSPITDL		60	1.04232	0.104232	0.687478	0.0687478	0.629871	0.0629871
Cac2	379	388	LAWSEDGSTL		0	0	0	0	0	0	0
Cac2	379	388	LAWSEDGSTL		0.01	0.023467	0.00260744	0.022119	0.00245767	0.030012	0.00333467
Cac2	379	388	LAWSEDGSTL		1	0.550338	0.0611486	0.536376	0.0595974	0.56758	0.0630645
Cac2	379	388	LAWSEDGSTL		10	1.06576	0.118418	1.10082	0.122313	1.16172	0.12908
Cac2	379	388	LAWSEDGSTL		30	1.27094	0.141215	1.33828	0.148698	1.27175	0.141305
Cac2	379	388	LAWSEDGSTL		60	1.52086	0.168984	1.47503	0.163893	1.5293	0.169922
Cac2	379	389	LAWSEDGSTLL		0	0	0	0	0	0	0
Cac2	379	389	LAWSEDGSTLL		0.01	0.057951	0.0057951	0.055232	0.0055232	0.043553	0.0043553
Cac2	379	389	LAWSEDGSTLL		1	0.601243	0.0601243	0.528657	0.0528657	0.478566	0.0478566
Cac2	379	389	LAWSEDGSTLL		10	0.925999	0.0925999	1.20148	0.120148	1.19384	0.119384
Cac2	379	389	LAWSEDGSTLL		30	1.35607	0.135607	1.34733	0.134733	1.30117	0.130117
Cac2	379	389	LAWSEDGSTLL		60	1.49713	0.149713	1.50109	0.150109	1.51932	0.151932
Cac2	380	388	AWSEDGSTL		0	0	0	0	0	0	0
Cac2	380	388	AWSEDGSTL		0.01	0.044232	0.005529	0.041163	0.00514538	0.026887	0.00336088
Cac2	380	388	AWSEDGSTL		1	0.501358	0.0626697	0.491823	0.0614779	0.423532	0.0529416
Cac2	380	388	AWSEDGSTL		10	0.940972	0.117621	1.00271	0.125339	1.0428	0.13035
Cac2	380	388	AWSEDGSTL		30	1.09201	0.136502	1.08721	0.135901	1.07624	0.13453
Cac2	380	388	AWSEDGSTL		60	1.16726	0.145908	1.13289	0.141611	1.1563	0.144538
Cac2	380	389	AWSEDGSTLL		0	0	0	0	0	0	0
Cac2	380	389	AWSEDGSTLL		0.01	0.019918	0.00221311	0.0341	0.00378889	0.037298	0.00414422
Cac2	380	389	AWSEDGSTLL		1	0.471756	0.0524173	0.467169	0.0519077	0.45802	0.0508911
Cac2	380	389	AWSEDGSTLL		10	0.899153	0.0999059	0.916174	0.101797	0.966304	0.107367
Cac2	380	389	AWSEDGSTLL		30	0.973402	0.108156	0.993336	0.110371	1.03432	0.114924
Cac2	380	389	AWSEDGSTLL		60	1.03096	0.114551	1.00381	0.111534	1.09432	0.121592
Cac2	389	396	LISSTDGF		0	0	0	0	0	0	0
Cac2	389	396	LISSTDGF		0.01	0.013154	0.00187914	0.038721	0.00553157	0.00695	0.000992857
Cac2	389	396	LISSTDGF		1	-0.0937476	-0.0133925	-0.018419	-0.00263128	-0.0359945	-0.00514207
Cac2	389	396	LISSTDGF		10	-0.0567587	-0.00810838	-0.00122585	-0.000175121	0.00781938	0.00111705
Cac2	389	396	LISSTDGF		30	0.0143339	0.0020477	0.0339484	0.00484977	0.0242158	0.00345939
Cac2	389	396	LISSTDGF		60	0.200505	0.0286436	0.0571594	0.00816562	0.0126288	0.00180412
Cac2	390	396	ISSTDGF		0	0	0	0	0	0	0
Cac2	390	396	ISSTDGF		0.01	0.069944	0.0116573	0.052389	0.0087315	0.040053	0.0066755
Cac2	390	396	ISSTDGF		1	0.0386852	0.00644754	0.0420669	0.00701116	-0.0233818	-0.00389697
Cac2	390	396	ISSTDGF		10	0.0848347	0.0141391	0.0669938	0.0111656	0.0238886	0.00398143
Cac2	390	396	ISSTDGF		30	0.143284	0.0238807	0.102187	0.0170312	-0.0242134	-0.00403556
Cac2	390	396	ISSTDGF		60	0.200638	0.0334396	0.102618	0.017103	0.0615969	0.0102662
Cac2	400	417	VSIDTETQFGSRIEPPAM		0	0	0	0	0	0	0
Cac2	400	417	VSIDTETQFGSRIEPPAM		0.01	0.034895	0.00232633	0.049736	0.00331573	-0.011916	-0.0007944
Cac2	400	417	VSIDTETQFGSRIEPPAM		1	4.07869	0.271913	4.17615	0.27841	4.40734	0.293823
Cac2	400	417	VSIDTETQFGSRIEPPAM		10	5.35524	0.357016	5.87856	0.391904	6.09847	0.406564
Cac2	400	417	VSIDTETQFGSRIEPPAM		30	5.84281	0.389521	6.41463	0.427642	6.17442	0.411628
Cac2	400	417	VSIDTETQFGSRIEPPAM		60	6.21464	0.414309	6.80374	0.453582	6.70364	0.44691
Cac2	405	417	ETQFGSRIEPPAM		0	0	0	0	0	0	0
Cac2	405	417	ETQFGSRIEPPAM		0.01	0.097108	0.0097108	0.099141	0.0099141	0.076626	0.0076626
Cac2	405	417	ETQFGSRIEPPAM		1	3.06522	0.306522	3.02096	0.302096	3.04709	0.304709
Cac2	405	417	ETQFGSRIEPPAM		10	4.50905	0.450905	3.88501	0.388501	3.90079	0.390079
Cac2	405	417	ETQFGSRIEPPAM		30	4.70947	0.470947	4.38466	0.438466	4.46468	0.446468
Cac2	405	417	ETQFGSRIEPPAM		60	4.8726	0.48726	4.52566	0.452566	4.52275	0.452275
Cac2	409	417	GSRIEPPAM		0	0	0	0	0	0	0
Cac2	409	417	GSRIEPPAM		0.01	0.07789	0.0129817	0.142339	0.0158154	0.067466	0.0112443
Cac2	409	417	GSRIEPPAM		1	2.6001	0.433349	2.85035	0.316705	2.57858	0.429764
Cac2	409	417	GSRIEPPAM		10	2.83126	0.471876	3.69622	0.410691	2.8108	0.468467
Cac2	409	417	GSRIEPPAM		30	2.74983	0.458304	3.92412	0.436014	2.80574	0.467624
Cac2	409	417	GSRIEPPAM		60	2.90743	0.484572	3.94817	0.438685	2.85568	0.475946
Cac2	410	424	SRIEPPAMHAEPLDT		0	0	0	0	0	0	0
Cac2	410	424	SRIEPPAMHAEPLDT		0.01	0.126531	0.0115028	0.132947	0.0120861	0.13878	0.0126164
Cac2	410	424	SRIEPPAMHAEPLDT		1	1.57316	0.143014	1.30987	0.119079	1.28726	0.117024
Cac2	410	424	SRIEPPAMHAEPLDT		10	2.2429	0.2039	1.86757	0.169779	1.75067	0.159152
Cac2	410	424	SRIEPPAMHAEPLDT		30	2.54446	0.231314	1.99157	0.181052	2.20183	0.200166
Cac2	410	424	SRIEPPAMHAEPLDT		60	2.89817	0.26347	2.51413	0.228557	2.26946	0.206314
Cac2	427	443	SAVAAKNQREAGGIVNM		0	0	0	0	0	0	0
Cac2	427	443	SAVAAKNQREAGGIVNM		0.01	-0.017832	-0.0011145	-0.007504	-0.000469	-0.018954	-0.00118462
Cac2	427	443	SAVAAKNQREAGGIVNM		1	11.0526	0.690789	11.164	0.697748	11.1095	0.694346
Cac2	427	443	SAVAAKNQREAGGIVNM		10	11.0134	0.688335	11.3153	0.707207	11.2854	0.70534
Cac2	427	443	SAVAAKNQREAGGIVNM		30	10.9654	0.685337	11.115	0.694686	11.2937	0.705858
Cac2	427	443	SAVAAKNQREAGGIVNM		60	11.1681	0.698005	11.1874	0.699212	10.986	0.686628

## Sheet: Cac3 plot
protein	amino acids		Sequence	modification	Time/min	tCAF-1		DMH3-H4•tCAF-1		WTH3-H4•tCAF-1
	start	end				Deut uptake	%Deut uptake	Deut uptake	%Deut uptake	Deut uptake	%Deut uptake
Cac3	1	19	MNQCAKDITHEASSIPIDL	Acetyl K (6)	0	0	0	0	0	0	0
Cac3	1	19	MNQCAKDITHEASSIPIDL	Acetyl K (6)	0.01	0.030483	0.00179312	0.031453	0.00185018	0.049924	0.00293671
Cac3	1	19	MNQCAKDITHEASSIPIDL	Acetyl K (6)	1	11.6154	0.68326	11.7476	0.691035	11.5879	0.681642
Cac3	1	19	MNQCAKDITHEASSIPIDL	Acetyl K (6)	10	11.4616	0.674211	11.8251	0.695596	11.9654	0.703846
Cac3	1	19	MNQCAKDITHEASSIPIDL	Acetyl K (6)	30	11.3226	0.666037	11.6465	0.685088	11.7758	0.692696
Cac3	1	19	MNQCAKDITHEASSIPIDL	Acetyl K (6)	60	11.8765	0.698616	11.6919	0.687757	11.5351	0.678536
Cac3	4	19	CAKDITHEASSIPIDL		0	0	0	0	0	0	0
Cac3	4	19	CAKDITHEASSIPIDL		0.01	0.066117	0.00472264	0.061041	0.00436007	0.028752	0.00205371
Cac3	4	19	CAKDITHEASSIPIDL		1	7.62152	0.544395	7.52528	0.53752	7.56036	0.540026
Cac3	4	19	CAKDITHEASSIPIDL		10	7.71974	0.55141	7.5246	0.537471	7.71821	0.551301
Cac3	4	19	CAKDITHEASSIPIDL		30	7.55051	0.539322	7.59376	0.542412	7.82084	0.558631
Cac3	4	19	CAKDITHEASSIPIDL		60	7.70729	0.550521	7.62687	0.544777	7.63132	0.545094
Cac3	8	19	ITHEASSIPIDL		0	0	0	0	0	0	0
Cac3	8	19	ITHEASSIPIDL		0.01	0.030124	0.0030124	0.039028	0.0039028	0.051074	0.0051074
Cac3	8	19	ITHEASSIPIDL		1	4.69185	0.469185	4.80457	0.480457	4.68764	0.468764
Cac3	8	19	ITHEASSIPIDL		10	4.72895	0.472895	4.77155	0.477155	4.80075	0.480075
Cac3	8	19	ITHEASSIPIDL		30	4.601	0.4601	4.71508	0.471508	4.87375	0.487375
Cac3	8	19	ITHEASSIPIDL		60	4.71905	0.471905	4.58182	0.458182	4.72849	0.472849
Cac3	12	19	ASSIPIDL		0	0	0	0	0	0	0
Cac3	12	19	ASSIPIDL		0.01	0.047472	0.007912	0.042793	0.00713217	0.031571	0.00526183
Cac3	12	19	ASSIPIDL		1	3.14691	0.524485	3.27773	0.546289	3.14574	0.52429
Cac3	12	19	ASSIPIDL		10	3.0626	0.510433	3.27474	0.54579	3.12264	0.520439
Cac3	12	19	ASSIPIDL		30	3.28629	0.547715	3.23127	0.538545	3.10766	0.517944
Cac3	12	19	ASSIPIDL		60	3.19762	0.532937	3.22642	0.537737	3.18024	0.53004
Cac3	20	32	QERYSHWKKNTKL		0	0	0	0	0	0	0
Cac3	20	32	QERYSHWKKNTKL		0.01	0.081866	0.00682217	0.040431	0.00336925	-0.016927	-0.00141058
Cac3	20	32	QERYSHWKKNTKL		1	0.548277	0.0456897	0.582191	0.0485159	0.431273	0.0359394
Cac3	20	32	QERYSHWKKNTKL		10	1.22276	0.101896	1.33456	0.111213	1.31968	0.109974
Cac3	20	32	QERYSHWKKNTKL		30	1.52741	0.127284	1.74669	0.145557	1.79722	0.149768
Cac3	20	32	QERYSHWKKNTKL		60	2.14225	0.178521	1.86405	0.155338	1.74676	0.145564
Cac3	36	47	YLNTNSTKWPSL		0	0	0	0	0	0	0
Cac3	36	47	YLNTNSTKWPSL		0.01	0.083851	0.0083851	0.078399	0.0078399	0.082218	0.0082218
Cac3	36	47	YLNTNSTKWPSL		1	1.43907	0.143907	1.38028	0.138028	1.57379	0.157379
Cac3	36	47	YLNTNSTKWPSL		10	1.95239	0.195239	1.57363	0.157363	1.58872	0.158872
Cac3	36	47	YLNTNSTKWPSL		30	2.05981	0.205981	1.81068	0.181068	1.66543	0.166543
Cac3	36	47	YLNTNSTKWPSL		60	2.40702	0.240702	2.04465	0.204465	1.91001	0.191001
Cac3	38	47	NTNSTKWPSL		0	0	0	0	0	0	0
Cac3	38	47	NTNSTKWPSL		0.01	0.026496	0.003312	0.024394	0.00304925	0.018818	0.00235225
Cac3	38	47	NTNSTKWPSL		1	1.25191	0.156489	1.23853	0.154817	1.21866	0.152333
Cac3	38	47	NTNSTKWPSL		10	1.53773	0.192217	1.39835	0.174794	1.37519	0.171898
Cac3	38	47	NTNSTKWPSL		30	1.9106	0.238825	1.5493	0.193662	1.4742	0.184275
Cac3	38	47	NTNSTKWPSL		60	2.08257	0.260322	1.68185	0.210231	1.63276	0.204095
Cac3	38	48	NTNSTKWPSLT		0	0	0	0	0	0	0
Cac3	38	48	NTNSTKWPSLT		0.01	0.064917	0.007213	0.186184	0.0206871	0.118231	0.0131368
Cac3	38	48	NTNSTKWPSLT		1	1.22461	0.136068	1.34646	0.149607	1.46437	0.162707
Cac3	38	48	NTNSTKWPSLT		10	1.69337	0.188152	1.50819	0.167577	1.69331	0.188145
Cac3	38	48	NTNSTKWPSLT		30	2.21311	0.245901	1.55701	0.173001	1.80808	0.200898
Cac3	38	48	NTNSTKWPSLT		60	2.19094	0.243437	1.82262	0.202514	1.88546	0.209496
Cac3	40	47	NSTKWPSL		0	0	0	0	0	0	0
Cac3	40	47	NSTKWPSL		0.01	-0.02871	-0.004785	-0.002665	-0.000444167	-0.03343	-0.00557167
Cac3	40	47	NSTKWPSL		1	0.772291	0.128715	0.861141	0.143523	0.829507	0.138251
Cac3	40	47	NSTKWPSL		10	1.11714	0.18619	0.942182	0.15703	0.929466	0.154911
Cac3	40	47	NSTKWPSL		30	1.39229	0.232048	1.1243	0.187384	0.963083	0.160514
Cac3	40	47	NSTKWPSL		60	1.58384	0.263973	1.25634	0.20939	1.16225	0.193708
Cac3	48	57	TCQFFPDLDT		0	0	0	0	0	0	0
Cac3	48	57	TCQFFPDLDT		0.01	0.067153	0.00839412	0.06801	0.00850125	0.091778	0.0114722
Cac3	48	57	TCQFFPDLDT		1	0.600896	0.075112	0.691294	0.0864117	0.794658	0.0993322
Cac3	48	57	TCQFFPDLDT		10	1.41992	0.177491	1.47091	0.183863	1.54711	0.193389
Cac3	48	57	TCQFFPDLDT		30	1.57254	0.196567	1.76151	0.220189	1.64912	0.206139
Cac3	48	57	TCQFFPDLDT		60	1.72383	0.215479	1.79929	0.224912	1.88551	0.235689
Cac3	52	66	FPDLDTTSDEHRILL		0	0	0	0	0	0	0
Cac3	52	66	FPDLDTTSDEHRILL		0.01	-0.044028	-0.00338677	-0.038682	-0.00297554	0.152776	0.011752
Cac3	52	66	FPDLDTTSDEHRILL		1	0.703478	0.0541137	0.680952	0.0523809	0.867501	0.0667308
Cac3	52	66	FPDLDTTSDEHRILL		10	1.01267	0.0778979	1.0906	0.0838925	1.52486	0.117297
Cac3	52	66	FPDLDTTSDEHRILL		30	1.21458	0.0934288	1.15863	0.0891257	1.62426	0.124943
Cac3	52	66	FPDLDTTSDEHRILL		60	1.2933	0.0994844	1.25018	0.0961676	1.75864	0.13528
Cac3	70	81	TSSQKPEDETIY		0	0	0	0	0	0	0
Cac3	70	81	TSSQKPEDETIY		0.01	0.016906	0.0016906	0.005513	0.0005513	0.025474	0.0025474
Cac3	70	81	TSSQKPEDETIY		1	1.10613	0.110613	0.861691	0.0861691	0.843637	0.0843637
Cac3	70	81	TSSQKPEDETIY		10	2.01797	0.201797	1.77179	0.177179	1.83459	0.183459
Cac3	70	81	TSSQKPEDETIY		30	2.38457	0.238457	2.25512	0.225512	2.2112	0.22112
Cac3	70	81	TSSQKPEDETIY		60	2.54476	0.254476	2.41022	0.241022	2.40826	0.240826
Cac3	80	96	IYISKISTLGHIKWSSL		0	0	0	0	0	0	0
Cac3	80	96	IYISKISTLGHIKWSSL		0.01	0.04309	0.00269312	0.03739	0.00233688	0.032041	0.00200256
Cac3	80	96	IYISKISTLGHIKWSSL		1	2.51929	0.157456	2.2927	0.143293	2.3505	0.146906
Cac3	80	96	IYISKISTLGHIKWSSL		10	3.5523	0.222019	3.35246	0.209529	3.48853	0.218033
Cac3	80	96	IYISKISTLGHIKWSSL		30	4.26184	0.266365	3.91019	0.244387	3.68337	0.230211
Cac3	80	96	IYISKISTLGHIKWSSL		60	4.58428	0.286518	4.21307	0.263317	4.29373	0.268358
Cac3	81	96	YISKISTLGHIKWSSL		0	0	0	0	0	0	0
Cac3	81	96	YISKISTLGHIKWSSL		0.01	0.032083	0.00213887	0.030069	0.0020046	0.043139	0.00287593
Cac3	81	96	YISKISTLGHIKWSSL		1	2.37895	0.158597	2.26631	0.151087	2.2644	0.15096
Cac3	81	96	YISKISTLGHIKWSSL		10	3.45904	0.230603	3.20591	0.213727	3.34852	0.223235
Cac3	81	96	YISKISTLGHIKWSSL		30	4.1303	0.275353	3.81308	0.254205	3.60317	0.240211
Cac3	81	96	YISKISTLGHIKWSSL		60	4.47207	0.298138	4.09773	0.273182	4.21734	0.281156
Cac3	82	96	ISKISTLGHIKWSSL		0	0	0	0	0	0	0
Cac3	82	96	ISKISTLGHIKWSSL		0.01	0.066021	0.00471579	0.06609	0.00472071	0.053818	0.00384414
Cac3	82	96	ISKISTLGHIKWSSL		1	2.45209	0.17515	2.35478	0.168199	2.30988	0.164991
Cac3	82	96	ISKISTLGHIKWSSL		10	3.49215	0.249439	3.25046	0.232175	3.36924	0.24066
Cac3	82	96	ISKISTLGHIKWSSL		30	4.12667	0.294762	3.81699	0.272642	3.77922	0.269944
Cac3	82	96	ISKISTLGHIKWSSL		60	4.47293	0.319495	4.14846	0.296318	4.19255	0.299468
Cac3	82	99	ISKISTLGHIKWSSLNNF		0	0	0	0	0	0	0
Cac3	82	99	ISKISTLGHIKWSSLNNF		0.01	0.040439	0.00237876	0.026095	0.001535	0.011156	0.000656235
Cac3	82	99	ISKISTLGHIKWSSLNNF		1	3.59648	0.211557	3.32739	0.195729	3.28244	0.193085
Cac3	82	99	ISKISTLGHIKWSSLNNF		10	4.82544	0.28385	4.4952	0.264424	4.71873	0.277573
Cac3	82	99	ISKISTLGHIKWSSLNNF		30	5.54958	0.326446	5.12154	0.301267	4.96742	0.292201
Cac3	82	99	ISKISTLGHIKWSSLNNF		60	6.0126	0.353682	5.49677	0.32334	5.5282	0.325188
Cac3	83	96	SKISTLGHIKWSSL		0	0	0	0	0	0	0
Cac3	83	96	SKISTLGHIKWSSL		0.01	0.027839	0.00214146	0.03945	0.00303462	0.069503	0.00534638
Cac3	83	96	SKISTLGHIKWSSL		1	2.35967	0.181513	2.2768	0.175139	2.40956	0.185351
Cac3	83	96	SKISTLGHIKWSSL		10	3.2692	0.251477	3.0605	0.235423	3.2216	0.247815
Cac3	83	96	SKISTLGHIKWSSL		30	3.83212	0.294779	3.70458	0.284968	3.56323	0.274095
Cac3	83	96	SKISTLGHIKWSSL		60	4.19373	0.322595	4.17282	0.320986	3.92059	0.301584
Cac3	88	96	LGHIKWSSL		0	0	0	0	0	0	0
Cac3	88	96	LGHIKWSSL		0.01	0.0287	0.0035875	0.028217	0.00352713	0.035222	0.00440275
Cac3	88	96	LGHIKWSSL		1	2.34178	0.292723	2.32227	0.290283	2.30838	0.288547
Cac3	88	96	LGHIKWSSL		10	2.94444	0.368055	2.73617	0.342021	2.82298	0.352873
Cac3	88	96	LGHIKWSSL		30	3.32146	0.415183	3.10893	0.388616	3.11501	0.389376
Cac3	88	96	LGHIKWSSL		60	3.43373	0.429216	3.2805	0.410063	3.68971	0.461214
Cac3	97	103	NNFDMDE		0	0	0	0	0	0	0
Cac3	97	103	NNFDMDE		0.01	0.032703	0.0054505	0.068853	0.0114755	-0.008098	-0.00134967
Cac3	97	103	NNFDMDE		1	1.509	0.2515	1.66687	0.277812	1.55918	0.259864
Cac3	97	103	NNFDMDE		10	2.22794	0.371323	2.32031	0.386718	2.29999	0.383332
Cac3	97	103	NNFDMDE		30	2.39297	0.398828	2.55124	0.425207	2.4735	0.41225
Cac3	97	103	NNFDMDE		60	2.60915	0.434858	2.62516	0.437526	2.54775	0.424625
Cac3	104	111	MEFKPENS		0	0	0	0	0	0	0
Cac3	104	111	MEFKPENS		0.01	0.016876	0.00281267	0.00573	0.000955	0.021516	0.003586
Cac3	104	111	MEFKPENS		1	1.98341	0.330569	1.84887	0.308145	1.8726	0.3121
Cac3	104	111	MEFKPENS		10	2.06023	0.343371	2.038	0.339667	2.10316	0.350527
Cac3	104	111	MEFKPENS		30	2.21668	0.369447	1.94943	0.324905	2.0611	0.343516
Cac3	104	111	MEFKPENS		60	2.35536	0.39256	2.03359	0.338931	2.14512	0.35752
Cac3	104	114	MEFKPENSTRF		0	0	0	0	0	0	0
Cac3	104	114	MEFKPENSTRF		0.01	0.126243	0.014027	0.04869	0.00541	0.141722	0.0157469
Cac3	104	114	MEFKPENSTRF		1	3.72323	0.413692	3.66272	0.406969	3.65137	0.405707
Cac3	104	114	MEFKPENSTRF		10	3.8963	0.432922	3.64801	0.405335	4.11407	0.457119
Cac3	104	114	MEFKPENSTRF		30	3.91449	0.434943	3.83548	0.426164	4.14611	0.460678
Cac3	104	114	MEFKPENSTRF		60	4.10667	0.456296	3.8483	0.427589	3.99483	0.44387
Cac3	104	122	MEFKPENSTRFPSKHLVND		0	0	0	0	0	0	0
Cac3	104	122	MEFKPENSTRFPSKHLVND		0.01	0.037659	0.00235369	0.043469	0.00271681	0.12405	0.00775312
Cac3	104	122	MEFKPENSTRFPSKHLVND		1	5.90255	0.368909	5.78391	0.361495	5.94211	0.371382
Cac3	104	122	MEFKPENSTRFPSKHLVND		10	6.22017	0.388761	6.15757	0.384848	6.55574	0.409734
Cac3	104	122	MEFKPENSTRFPSKHLVND		30	6.34699	0.396687	6.36618	0.397886	6.75446	0.422154
Cac3	104	122	MEFKPENSTRFPSKHLVND		60	6.80846	0.425529	6.40454	0.400284	6.62312	0.413945
Cac3	104	124	MEFKPENSTRFPSKHLVNDIS		0	0	0	0	0	0	0
Cac3	104	124	MEFKPENSTRFPSKHLVNDIS		0.01	0.049601	0.00275561	0.054646	0.00303589	0.028656	0.001592
Cac3	104	124	MEFKPENSTRFPSKHLVNDIS		1	6.55301	0.364056	6.46119	0.358955	6.3916	0.355089
Cac3	104	124	MEFKPENSTRFPSKHLVNDIS		10	7.36927	0.409404	7.47268	0.415149	7.46054	0.414474
Cac3	104	124	MEFKPENSTRFPSKHLVNDIS		30	7.61641	0.423134	7.49667	0.416482	7.75969	0.431094
Cac3	104	124	MEFKPENSTRFPSKHLVNDIS		60	8.11131	0.450628	7.67645	0.426469	7.7347	0.429706
Cac3	123	132	ISIFFPNGEC		0	0	0	0	0	0	0
Cac3	123	132	ISIFFPNGEC		0.01	0.029638	0.00370475	0.019628	0.0024535	0.033785	0.00422313
Cac3	123	132	ISIFFPNGEC		1	1.12081	0.140102	1.09623	0.137028	1.05751	0.132189
Cac3	123	132	ISIFFPNGEC		10	1.85751	0.232189	1.77023	0.221279	1.82218	0.227773
Cac3	123	132	ISIFFPNGEC		30	2.08828	0.261035	2.01875	0.252343	2.08884	0.261105
Cac3	123	132	ISIFFPNGEC		60	2.22553	0.278192	2.11383	0.264229	2.1504	0.2688
Cac3	123	133	ISIFFPNGECN		0	0	0	0	0	0	0
Cac3	123	133	ISIFFPNGECN		0.01	0.02913	0.00323667	0.018973	0.00210811	0.023193	0.002577
Cac3	123	133	ISIFFPNGECN		1	1.37503	0.152781	1.39421	0.154912	1.37106	0.152341
Cac3	123	133	ISIFFPNGECN		10	2.1115	0.234611	2.20457	0.244953	2.14375	0.238195
Cac3	123	133	ISIFFPNGECN		30	2.26507	0.251674	2.2983	0.255367	2.32421	0.258246
Cac3	123	133	ISIFFPNGECN		60	2.3459	0.260655	2.21631	0.246256	2.25703	0.250781
Cac3	123	146	ISIFFPNGECNRARYLPQNPDIIA		0	0	0	0	0	0	0
Cac3	123	146	ISIFFPNGECNRARYLPQNPDIIA		0.01	0.052922	0.0026461	0.049472	0.0024736	0.074535	0.00372675
Cac3	123	146	ISIFFPNGECNRARYLPQNPDIIA		1	1.16072	0.0580361	1.16243	0.0581214	1.16042	0.0580211
Cac3	123	146	ISIFFPNGECNRARYLPQNPDIIA		10	2.35689	0.117845	2.40158	0.120079	2.49843	0.124921
Cac3	123	146	ISIFFPNGECNRARYLPQNPDIIA		30	2.99396	0.149698	2.9191	0.145955	2.96357	0.148179
Cac3	123	146	ISIFFPNGECNRARYLPQNPDIIA		60	3.37523	0.168761	3.132	0.1566	3.03853	0.151927
Cac3	125	132	IFFPNGEC		0	0	0	0	0	0	0
Cac3	125	132	IFFPNGEC		0.01	0.08371	0.0139517	0.080819	0.0134698	0.093271	0.0155452
Cac3	125	132	IFFPNGEC		1	0.733706	0.122284	0.774627	0.129104	0.795621	0.132604
Cac3	125	132	IFFPNGEC		10	1.21421	0.202369	1.2529	0.208817	1.24027	0.206711
Cac3	125	132	IFFPNGEC		30	1.59275	0.265458	1.31723	0.219539	1.36031	0.226718
Cac3	125	132	IFFPNGEC		60	1.43167	0.238612	1.29411	0.215684	1.33674	0.22279
Cac3	125	133	IFFPNGECN		0	0	0	0	0	0	0
Cac3	125	133	IFFPNGECN		0.01	0.042483	0.006069	0.047222	0.006746	0.05805	0.00829286
Cac3	125	133	IFFPNGECN		1	0.67387	0.0962671	0.769546	0.109935	0.699388	0.0999125
Cac3	125	133	IFFPNGECN		10	1.11432	0.159188	1.2041	0.172014	1.24085	0.177265
Cac3	125	133	IFFPNGECN		30	1.31086	0.187265	1.31929	0.18847	1.35977	0.194253
Cac3	125	133	IFFPNGECN		60	1.40017	0.200025	1.33673	0.190962	1.33734	0.191048
Cac3	125	146	IFFPNGECNRARYLPQNPDIIA		0	0	0	0	0	0	0
Cac3	125	146	IFFPNGECNRARYLPQNPDIIA		0.01	0.074201	0.00412228	0.093542	0.00519678	0.080716	0.00448422
Cac3	125	146	IFFPNGECNRARYLPQNPDIIA		1	0.626546	0.0348081	0.657218	0.0365121	0.602394	0.0334663
Cac3	125	146	IFFPNGECNRARYLPQNPDIIA		10	1.50634	0.0836857	1.50415	0.0835641	1.52256	0.0845864
Cac3	125	146	IFFPNGECNRARYLPQNPDIIA		30	2.17016	0.120565	2.01311	0.111839	2.11158	0.11731
Cac3	125	146	IFFPNGECNRARYLPQNPDIIA		60	2.4518	0.136211	2.2359	0.124216	2.1143	0.117461
Cac3	127	146	FPNGECNRARYLPQNPDIIA		0	0	0	0	0	0	0
Cac3	127	146	FPNGECNRARYLPQNPDIIA		0.01	0.033602	0.00210012	0.047432	0.0029645	0.01964	0.0012275
Cac3	127	146	FPNGECNRARYLPQNPDIIA		1	0.558658	0.0349161	0.569339	0.0355837	0.613836	0.0383647
Cac3	127	146	FPNGECNRARYLPQNPDIIA		10	1.56358	0.0977235	1.39641	0.0872757	1.51169	0.0944805
Cac3	127	146	FPNGECNRARYLPQNPDIIA		30	2.05249	0.128281	1.92845	0.120528	2.02417	0.12651
Cac3	127	146	FPNGECNRARYLPQNPDIIA		60	2.46434	0.154021	2.14665	0.134166	2.15349	0.134593
Cac3	133	146	NRARYLPQNPDIIA		0	0	0	0	0	0	0
Cac3	133	146	NRARYLPQNPDIIA		0.01	0.047793	0.00434482	0.04839	0.00439909	0.025614	0.00232855
Cac3	133	146	NRARYLPQNPDIIA		1	0.233294	0.0212085	0.218344	0.0198495	0.172388	0.0156716
Cac3	133	146	NRARYLPQNPDIIA		10	0.714757	0.064978	0.644058	0.0585507	0.674068	0.0612789
Cac3	133	146	NRARYLPQNPDIIA		30	1.16164	0.105604	1.12812	0.102556	1.00352	0.0912293
Cac3	133	146	NRARYLPQNPDIIA		60	1.43584	0.130531	1.24538	0.113216	1.18831	0.108028
Cac3	133	153	NRARYLPQNPDIIAGASSDGA		0	0	0	0	0	0	0
Cac3	133	153	NRARYLPQNPDIIAGASSDGA		0.01	0.039809	0.00221161	0.042677	0.00237094	0.051935	0.00288528
Cac3	133	153	NRARYLPQNPDIIAGASSDGA		1	0.120317	0.00668425	0.180764	0.0100424	0.130977	0.00727652
Cac3	133	153	NRARYLPQNPDIIAGASSDGA		10	0.725459	0.0403033	0.719222	0.0399568	0.700517	0.0389176
Cac3	133	153	NRARYLPQNPDIIAGASSDGA		30	1.31781	0.0732119	1.17905	0.0655026	1.08207	0.0601149
Cac3	133	153	NRARYLPQNPDIIAGASSDGA		60	1.54076	0.085598	1.39671	0.0775948	1.33199	0.0739992
Cac3	133	154	NRARYLPQNPDIIAGASSDGAI		0	0	0	0	0	0	0
Cac3	133	154	NRARYLPQNPDIIAGASSDGAI		0.01	-0.009113	-0.000479632	-0.013198	-0.000694632	-0.048043	-0.00252858
Cac3	133	154	NRARYLPQNPDIIAGASSDGAI		1	0.0320641	0.00168758	0.0511586	0.00269256	0.0556364	0.00292823
Cac3	133	154	NRARYLPQNPDIIAGASSDGAI		10	0.722113	0.0380059	0.679141	0.0357443	0.632551	0.0332922
Cac3	133	154	NRARYLPQNPDIIAGASSDGAI		30	1.21727	0.064067	1.21587	0.0639932	1.07172	0.0564064
Cac3	133	154	NRARYLPQNPDIIAGASSDGAI		60	1.61553	0.0850281	1.38388	0.0728356	1.39641	0.073495
Cac3	134	146	RARYLPQNPDIIA		0	0	0	0	0	0	0
Cac3	134	146	RARYLPQNPDIIA		0.01	0.041144	0.0041144	0.050067	0.0050067	0.038882	0.0038882
Cac3	134	146	RARYLPQNPDIIA		1	0.127988	0.0127988	0.175465	0.0175465	0.17522	0.017522
Cac3	134	146	RARYLPQNPDIIA		10	0.617609	0.0617609	0.588891	0.0588891	0.668828	0.0668828
Cac3	134	146	RARYLPQNPDIIA		30	1.06777	0.106777	1.04228	0.104228	0.909225	0.0909225
Cac3	134	146	RARYLPQNPDIIA		60	1.22917	0.122917	1.21813	0.121813	1.09093	0.109093
Cac3	134	153	RARYLPQNPDIIAGASSDGA		0	0	0	0	0	0	0
Cac3	134	153	RARYLPQNPDIIAGASSDGA		0.01	0.035346	0.00207918	0.037302	0.00219424	0.02817	0.00165706
Cac3	134	153	RARYLPQNPDIIAGASSDGA		1	0.125964	0.00740965	0.173982	0.0102343	0.161736	0.00951387
Cac3	134	153	RARYLPQNPDIIAGASSDGA		10	0.585531	0.034443	0.626485	0.0368521	0.693253	0.0407796
Cac3	134	153	RARYLPQNPDIIAGASSDGA		30	1.26866	0.0746269	1.1162	0.0656586	1.09542	0.0644366
Cac3	134	153	RARYLPQNPDIIAGASSDGA		60	1.40714	0.0827727	1.26106	0.0741801	1.20946	0.0711448
Cac3	134	154	RARYLPQNPDIIAGASSDGAI		0	0	0	0	0	0	0
Cac3	134	154	RARYLPQNPDIIAGASSDGAI		0.01	-0.019447	-0.00108039	-0.007265	-0.000403611	-0.016641	-0.0009245
Cac3	134	154	RARYLPQNPDIIAGASSDGAI		1	0.0925237	0.00514021	0.0982242	0.0054569	0.112222	0.00623456
Cac3	134	154	RARYLPQNPDIIAGASSDGAI		10	0.638162	0.0354534	0.674103	0.0374502	0.728783	0.0404879
Cac3	134	154	RARYLPQNPDIIAGASSDGAI		30	1.28771	0.0715396	1.18184	0.0656579	1.04986	0.0583258
Cac3	134	154	RARYLPQNPDIIAGASSDGAI		60	1.48929	0.0827383	1.33324	0.074069	1.24475	0.069153
Cac3	134	155	RARYLPQNPDIIAGASSDGAIY		0	0	0	0	0	0	0
Cac3	134	155	RARYLPQNPDIIAGASSDGAIY		0.01	0.118082	0.00621484	0.023636	0.001244	0.041695	0.00219447
Cac3	134	155	RARYLPQNPDIIAGASSDGAIY		1	0.197355	0.0103871	0.143837	0.00757034	0.183696	0.00966822
Cac3	134	155	RARYLPQNPDIIAGASSDGAIY		10	0.739427	0.0389172	0.627786	0.0330414	0.735623	0.038717
Cac3	134	155	RARYLPQNPDIIAGASSDGAIY		30	1.27038	0.0668622	1.12693	0.0593121	0.931716	0.0490377
Cac3	134	155	RARYLPQNPDIIAGASSDGAIY		60	1.44039	0.0758103	1.16454	0.0612914	1.08348	0.0570251
Cac3	147	155	GASSDGAIY		0	0	0	0	0	0	0
Cac3	147	155	GASSDGAIY		0.01	0.032695	0.00408687	0.038187	0.00477337	0.04499	0.00562375
Cac3	147	155	GASSDGAIY		1	0.0182775	0.00228469	0.0804801	0.01006	0.135456	0.016932
Cac3	147	155	GASSDGAIY		10	0.0939873	0.0117484	0.154067	0.0192584	0.191636	0.0239545
Cac3	147	155	GASSDGAIY		30	0.1659	0.0207375	0.20758	0.0259475	0.208015	0.0260019
Cac3	147	155	GASSDGAIY		60	0.192474	0.0240592	0.224827	0.0281034	0.246335	0.0307918
Cac3	156	177	IFDRTKHGSTRIRQSKISHPFE		0	0	0	0	0	0	0
Cac3	156	177	IFDRTKHGSTRIRQSKISHPFE		0.01	0.049877	0.00249385	0.060241	0.00301205	0.018676	0.0009338
Cac3	156	177	IFDRTKHGSTRIRQSKISHPFE		1	5.06198	0.253099	5.2209	0.261045	5.30478	0.265239
Cac3	156	177	IFDRTKHGSTRIRQSKISHPFE		10	5.57296	0.278648	5.57962	0.278981	5.65148	0.282574
Cac3	156	177	IFDRTKHGSTRIRQSKISHPFE		30	5.87917	0.293959	6.22151	0.311075	5.92432	0.296216
Cac3	156	177	IFDRTKHGSTRIRQSKISHPFE		60	6.57896	0.328948	6.55628	0.327814	6.21357	0.310678
Cac3	156	179	IFDRTKHGSTRIRQSKISHPFETK		0	0	0	0	0	0	0
Cac3	156	179	IFDRTKHGSTRIRQSKISHPFETK		0.01	0.033971	0.00154414	0.018188	0.000826727	0.064562	0.00293464
Cac3	156	179	IFDRTKHGSTRIRQSKISHPFETK		1	4.47981	0.203628	4.36993	0.198633	4.63133	0.210515
Cac3	156	179	IFDRTKHGSTRIRQSKISHPFETK		10	4.96685	0.225766	4.86097	0.220953
Cac3	156	179	IFDRTKHGSTRIRQSKISHPFETK		30	5.69099	0.258681	5.50341	0.250155	5.7467	0.261214
Cac3	156	179	IFDRTKHGSTRIRQSKISHPFETK		60	6.4929	0.295132	6.14817	0.279462	6.30108	0.286413
Cac3	156	180	IFDRTKHGSTRIRQSKISHPFETKL		0	0	0	0	0	0	0
Cac3	156	180	IFDRTKHGSTRIRQSKISHPFETKL		0.01	0.052968	0.00230296	0.058824	0.00255757	0.045253	0.00196752
Cac3	156	180	IFDRTKHGSTRIRQSKISHPFETKL		1	4.56665	0.19855	4.60595	0.200259	4.57373	0.198858
Cac3	156	180	IFDRTKHGSTRIRQSKISHPFETKL		10	5.081	0.220913	5.0596	0.219983	5.14182	0.223557
Cac3	156	180	IFDRTKHGSTRIRQSKISHPFETKL		30	5.76197	0.250521	5.70588	0.248082	5.8234	0.253191
Cac3	156	180	IFDRTKHGSTRIRQSKISHPFETKL		60	6.631	0.288304	6.31006	0.27435	6.292	0.273565
Cac3	157	180	FDRTKHGSTRIRQSKISHPFETKL		0	0	0	0	0	0	0
Cac3	157	180	FDRTKHGSTRIRQSKISHPFETKL		0.01	0.048293	0.00219514	0.036186	0.00164482	0.041546	0.00188845
Cac3	157	180	FDRTKHGSTRIRQSKISHPFETKL		1	4.46535	0.202971	4.52629	0.20574	4.46361	0.202892
Cac3	157	180	FDRTKHGSTRIRQSKISHPFETKL		10	4.93784	0.224447	5.03476	0.228853	5.00467	0.227485
Cac3	157	180	FDRTKHGSTRIRQSKISHPFETKL		30	5.62774	0.255806			5.64804	0.256729
Cac3	157	180	FDRTKHGSTRIRQSKISHPFETKL		60	6.48317	0.294689	6.2416	0.283709	6.13351	0.278796
Cac3	181	189	FGSHGVIQD		0	0	0	0	0	0	0
Cac3	181	189	FGSHGVIQD		0.01	0.016814	0.00210175	0.022882	0.00286025	0.03016	0.00377
Cac3	181	189	FGSHGVIQD		1	3.66506	0.458133	3.79867	0.474834	3.84231	0.480288
Cac3	181	189	FGSHGVIQD		10	3.80896	0.47612	3.76767	0.470959	3.71876	0.464844
Cac3	181	189	FGSHGVIQD		30	3.71932	0.464915	3.72356	0.465444	3.84043	0.480053
Cac3	181	189	FGSHGVIQD		60	3.79544	0.47443	3.77996	0.472495	3.68973	0.461216
Cac3	181	191	FGSHGVIQDVE		0	0	0	0	0	0	0
Cac3	181	191	FGSHGVIQDVE		0.01	0.055449	0.0055449	-0.013137	-0.0013137	0.025031	0.0025031
Cac3	181	191	FGSHGVIQDVE		1	4.8889	0.48889	5.11205	0.511205	4.90278	0.490278
Cac3	181	191	FGSHGVIQDVE		10	4.9431	0.49431	5.15113	0.515113	4.95572	0.495572
Cac3	181	191	FGSHGVIQDVE		30	4.89273	0.489273	5.08017	0.508017	4.91017	0.491017
Cac3	181	191	FGSHGVIQDVE		60	4.93633	0.493633	5.09573	0.509573	4.8405	0.48405
Cac3	181	192	FGSHGVIQDVEA		0	0	0	0	0	0	0
Cac3	181	192	FGSHGVIQDVEA		0.01	0.044783	0.00407118	0.035375	0.00321591	0.047151	0.00428645
Cac3	181	192	FGSHGVIQDVEA		1	5.74565	0.522332	5.93524	0.539567	5.89054	0.535503
Cac3	181	192	FGSHGVIQDVEA		10	5.71912	0.51992	5.9797	0.543609	5.94451	0.54041
Cac3	181	192	FGSHGVIQDVEA		30	5.7623	0.523845	5.90129	0.536481	6.03269	0.548427
Cac3	181	192	FGSHGVIQDVEA		60	5.83602	0.530548	5.9207	0.538245	5.82995	0.529995
Cac3	192	202	AMDTSSADINE		0	0	0	0	0	0	0
Cac3	192	202	AMDTSSADINE		0.01	0.063955	0.0063955	0.059876	0.0059876	0.048579	0.0048579
Cac3	192	202	AMDTSSADINE		1	6.17686	0.617686	6.21168	0.621168	6.19178	0.619178
Cac3	192	202	AMDTSSADINE		10	6.1419	0.61419	6.22161	0.622161	6.32302	0.632302
Cac3	192	202	AMDTSSADINE		30	5.82037	0.582037	6.14278	0.614278	6.24281	0.624281
Cac3	192	202	AMDTSSADINE		60	6.10963	0.610963	6.12295	0.612295	6.15008	0.615008
Cac3	193	202	MDTSSADINE		0	0	0	0	0	0	0
Cac3	193	202	MDTSSADINE		0.01	0.052739	0.00585989	0.048452	0.00538356	0.037864	0.00420711
Cac3	193	202	MDTSSADINE		1	5.26273	0.584748	5.3072	0.589689	5.2711	0.585677
Cac3	193	202	MDTSSADINE		10	5.31244	0.590272	5.35022	0.594468	5.41058	0.601176
Cac3	193	202	MDTSSADINE		30	5.27883	0.586537	5.27629	0.586255	5.47502	0.608336
Cac3	193	202	MDTSSADINE		60	5.33032	0.592258	5.32635	0.591817	5.31856	0.590951
Cac3	203	212	ATSLAWNLQQ		0	0	0	0	0	0	0
Cac3	203	212	ATSLAWNLQQ		0.01	-0.075298	-0.00836644	-0.112502	-0.0125002	-0.021019	-0.00233544
Cac3	203	212	ATSLAWNLQQ		1	1.00406	0.111562	1.02291	0.113657	1.05476	0.117196
Cac3	203	212	ATSLAWNLQQ		10	1.58761	0.176401	1.62203	0.180226	1.64566	0.182852
Cac3	203	212	ATSLAWNLQQ		30	1.56033	0.17337	1.64774	0.183082	1.59813	0.17757
Cac3	203	212	ATSLAWNLQQ		60	1.59654	0.177394	1.69793	0.188658	1.74205	0.193561
Cac3	217	228	LSSHSNGQVQVW		0	0	0	0	0	0	0
Cac3	217	228	LSSHSNGQVQVW		0.01	0.093118	0.00846527	0.091319	0.00830173	0.083858	0.00762345
Cac3	217	228	LSSHSNGQVQVW		1	0.360097	0.0327361	0.409117	0.0371925	0.415064	0.0377331
Cac3	217	228	LSSHSNGQVQVW		10	0.566638	0.0515126	0.562217	0.0511107	0.587974	0.0534522
Cac3	217	228	LSSHSNGQVQVW		30	0.722841	0.0657128	0.695764	0.0632512	0.695769	0.0632518
Cac3	217	228	LSSHSNGQVQVW		60	0.852838	0.0775307	0.840016	0.0763651	0.815557	0.0741415
Cac3	217	232	LSSHSNGQVQVWDIKQ		0	0	0	0	0	0	0
Cac3	217	232	LSSHSNGQVQVWDIKQ		0.01	0.054127	0.00360847	0.00042	2.8e-05	0.009324	0.0006216
Cac3	217	232	LSSHSNGQVQVWDIKQ		1	0.446996	0.0297997	0.442374	0.0294916	0.325583	0.0217055
Cac3	217	232	LSSHSNGQVQVWDIKQ		10	0.994726	0.0663151	0.956716	0.0637811	0.911029	0.0607353
Cac3	217	232	LSSHSNGQVQVWDIKQ		30	1.37765	0.0918433	1.4704	0.0980264	1.30434	0.0869557
Cac3	217	232	LSSHSNGQVQVWDIKQ		60	1.83195	0.12213	1.72968	0.115312	1.58654	0.105769
Cac3	228	242	WDIKQYSHENPIIDL		0	0	0	0	0	0	0
Cac3	228	242	WDIKQYSHENPIIDL		0.01	0.0287	0.00220769	0.062407	0.00480054	0.060334	0.00464108
Cac3	228	242	WDIKQYSHENPIIDL		1	1.2354	0.095031	1.32929	0.102253	1.29623	0.0997098
Cac3	228	242	WDIKQYSHENPIIDL		10	2.71184	0.208603	2.90271	0.223285	2.91502	0.224232
Cac3	228	242	WDIKQYSHENPIIDL		30	4.06484	0.31268	3.88582	0.298909	3.94812	0.303702
Cac3	228	242	WDIKQYSHENPIIDL		60	4.34948	0.334575	4.37874	0.336826	4.07498	0.31346
Cac3	229	242	DIKQYSHENPIIDL		0	0	0	0	0	0	0
Cac3	229	242	DIKQYSHENPIIDL		0.01	0.010924	0.000910333	0.021821	0.00181842	0.010172	0.000847667
Cac3	229	242	DIKQYSHENPIIDL		1	1.3033	0.108608	1.33441	0.111201	1.20291	0.100243
Cac3	229	242	DIKQYSHENPIIDL		10	2.91374	0.242812	3.08066	0.256722	3.07088	0.255906
Cac3	229	242	DIKQYSHENPIIDL		30	4.07118	0.339265	3.99425	0.332854	4.04469	0.337057
Cac3	229	242	DIKQYSHENPIIDL		60	4.58415	0.382012	4.51542	0.376285	4.55522	0.379601
Cac3	229	244	DIKQYSHENPIIDLPL		0	0	0	0	0	0	0
Cac3	229	244	DIKQYSHENPIIDLPL		0.01	0.030897	0.00237669	0.003271	0.000251615	0.034118	0.00262446
Cac3	229	244	DIKQYSHENPIIDLPL		1	1.40642	0.108186	1.24048	0.0954213	-3.81326	-0.293328
Cac3	229	244	DIKQYSHENPIIDLPL		10	3.19383	0.245679	3.05746	0.235189	-0.894507	-0.0688083
Cac3	229	244	DIKQYSHENPIIDLPL		30	3.97898	0.306075	3.98276	0.306366	0.226006	0.0173851
Cac3	229	244	DIKQYSHENPIIDLPL		60	4.58116	0.352397	4.52971	0.348439	1.06179	0.0816762
Cac3	233	242	YSHENPIIDL		0	0	0	0	0	0	0
Cac3	233	242	YSHENPIIDL		0.01	0.058789	0.00734863	0.058502	0.00731275	0.078121	0.00976513
Cac3	233	242	YSHENPIIDL		1	0.81009	0.101261	0.86501	0.108126	0.870125	0.108766
Cac3	233	242	YSHENPIIDL		10	1.5957	0.199462	1.76899	0.221124	1.82813	0.228516
Cac3	233	242	YSHENPIIDL		30	2.24501	0.280626	2.31136	0.28892	2.3255	0.290687
Cac3	233	242	YSHENPIIDL		60	2.59495	0.324368	2.70999	0.338748	2.60112	0.32514
Cac3	233	244	YSHENPIIDLPL		0	0	0	0	0	0	0
Cac3	233	244	YSHENPIIDLPL		0.01	0.049277	0.00547522	0.059823	0.006647	0.033603	0.00373367
Cac3	233	244	YSHENPIIDLPL		1	0.776634	0.0862927	0.754055	0.0837839	0.732917	0.0814352
Cac3	233	244	YSHENPIIDLPL		10	1.61012	0.178902	1.62007	0.180007	1.64614	0.182905
Cac3	233	244	YSHENPIIDLPL		30	2.22958	0.247731	2.20604	0.245116	2.26446	0.251607
Cac3	233	244	YSHENPIIDLPL		60	2.60595	0.28955	2.53714	0.281905	2.56558	0.285064
Cac3	233	256	YSHENPIIDLPLVSINSDGTAVND		0	0	0	0	0	0	0
Cac3	233	256	YSHENPIIDLPLVSINSDGTAVND		0.01	0.109077	0.00519414	0.072684	0.00346114	0.095282	0.00453724
Cac3	233	256	YSHENPIIDLPLVSINSDGTAVND		1	4.28041	0.203829	3.97633	0.189349	3.99937	0.190446
Cac3	233	256	YSHENPIIDLPLVSINSDGTAVND		10	6.00733	0.286063	6.01876	0.286608	6.45746	0.307498
Cac3	233	256	YSHENPIIDLPLVSINSDGTAVND		30	6.99772	0.333225	7.18449	0.342119	6.83897	0.325665
Cac3	233	256	YSHENPIIDLPLVSINSDGTAVND		60	7.62486	0.363089	7.30544	0.347878	7.48571	0.356462
Cac3	243	256	PLVSINSDGTAVND		0	0	0	0	0	0	0
Cac3	243	256	PLVSINSDGTAVND		0.01	-0.01459	-0.00121583	-0.00699	-0.0005825	-0.082618	-0.00688483
Cac3	243	256	PLVSINSDGTAVND		1	3.70088	0.308407	3.70178	0.308482	3.67815	0.306513
Cac3	243	256	PLVSINSDGTAVND		10	4.76721	0.397268	4.761	0.39675	4.88717	0.407264
Cac3	243	256	PLVSINSDGTAVND		30	4.96109	0.413424	5.16055	0.430046	5.10784	0.425653
Cac3	243	256	PLVSINSDGTAVND		60	5.19638	0.433032	5.16518	0.430432	5.13241	0.427701
Cac3	256	266	DVTWMPTHDSL		0	0	0	0	0	0	0
Cac3	256	266	DVTWMPTHDSL		0.01	0.088958	0.00988422	0.077594	0.00862156	0.082228	0.00913644
Cac3	256	266	DVTWMPTHDSL		1	1.1136	0.123733	1.06077	0.117863	1.02582	0.11398
Cac3	256	266	DVTWMPTHDSL		10	1.60547	0.178386	1.63437	0.181596	1.65471	0.183857
Cac3	256	266	DVTWMPTHDSL		30	1.65896	0.184329	1.66127	0.184586	1.66944	0.185493
Cac3	256	266	DVTWMPTHDSL		60	1.71972	0.19108	1.68194	0.186883	1.65603	0.184003
Cac3	257	266	VTWMPTHDSL		0	0	0	0	0	0	0
Cac3	257	266	VTWMPTHDSL		0.01	0.03056	0.00382	0.019739	0.00246737	0.068032	0.008504
Cac3	257	266	VTWMPTHDSL		1	0.964576	0.120572	0.9634	0.120425	0.994589	0.124324
Cac3	257	266	VTWMPTHDSL		10	1.46105	0.182631	1.51054	0.188818	1.57354	0.196692
Cac3	257	266	VTWMPTHDSL		30	1.61493	0.201866	1.53493	0.191866	1.61624	0.20203
Cac3	257	266	VTWMPTHDSL		60	1.58024	0.19753	1.55926	0.194907	1.61897	0.202371
Cac3	279	300	LDLRTKKEKLQSNREKHDGGVN		0	0	0	0	0	0	0
Cac3	279	300	LDLRTKKEKLQSNREKHDGGVN		0.01	0.023434	0.0011159	0.008937	0.000425571	0.013107	0.000624143
Cac3	279	300	LDLRTKKEKLQSNREKHDGGVN		1	5.10339	0.243018	5.16313	0.245863	5.17555	0.246455
Cac3	279	300	LDLRTKKEKLQSNREKHDGGVN		10	6.94963	0.330935	6.92774	0.329892	7.30684	0.347945
Cac3	279	300	LDLRTKKEKLQSNREKHDGGVN		30	7.95838	0.37897	7.83694	0.373188	7.68199	0.365809
Cac3	279	300	LDLRTKKEKLQSNREKHDGGVN		60	8.38872	0.399463	8.24634	0.392683	8.50733	0.405111
Cac3	291	304	NREKHDGGVNSCRF		0	0	0	0	0	0	0
Cac3	291	304	NREKHDGGVNSCRF		0.01	0.05929	0.00456077	0.191874	0.0147595	0.210651	0.0162039
Cac3	291	304	NREKHDGGVNSCRF		1	0.990754	0.0762118	1.19112	0.0916245	1.39473	0.107287
Cac3	291	304	NREKHDGGVNSCRF		10	1.6647	0.128054	1.53612	0.118163	1.85253	0.142502
Cac3	291	304	NREKHDGGVNSCRF		30	2.0982	0.1614	2.2415	0.172423	2.37689	0.182838
Cac3	291	304	NREKHDGGVNSCRF		60	2.53714	0.195165	2.51642	0.193571	2.57999	0.198461
Cac3	305	312	NYKNSLIL		0	0	0	0	0	0	0
Cac3	305	312	NYKNSLIL		0.01	0.053919	0.00770271	0.056161	0.008023	0.056797	0.00811386
Cac3	305	312	NYKNSLIL		1	0.689428	0.0984898	0.720043	0.102863	0.706785	0.100969
Cac3	305	312	NYKNSLIL		10	0.777377	0.111054	0.777713	0.111102	0.79089	0.112984
Cac3	305	312	NYKNSLIL		30	0.895269	0.127896	0.87974	0.125677	0.893456	0.127637
Cac3	305	312	NYKNSLIL		60	1.03806	0.148294	1.00372	0.143388	1.00686	0.143837
Cac3	311	323	ILASADSNGRLNL		0	0	0	0	0	0	0
Cac3	311	323	ILASADSNGRLNL		0.01	-0.051246	-0.0042705	-0.037301	-0.00310842	-0.038401	-0.00320008
Cac3	311	323	ILASADSNGRLNL		1	-0.0480887	-0.00400739	0.0173731	0.00144776	0.0206076	0.0017173
Cac3	311	323	ILASADSNGRLNL		10	-0.0472443	-0.00393703	0.0524808	0.0043734	0.0716241	0.00596868
Cac3	311	323	ILASADSNGRLNL		30	0.0345891	0.00288242	0.0236225	0.00196854	0.000791756	6.59796e-05
Cac3	311	323	ILASADSNGRLNL		60	0.00938661	0.000782217	0.0167625	0.00139688	0.0175251	0.00146042
Cac3	313	323	ASADSNGRLNL		0	0	0	0	0	0	0
Cac3	313	323	ASADSNGRLNL		0.01	0.03067	0.003067	0.034665	0.0034665	-0.017374	-0.0017374
Cac3	313	323	ASADSNGRLNL		1	0.0145192	0.00145192	0.0661352	0.00661352	-0.0419412	-0.00419412
Cac3	313	323	ASADSNGRLNL		10	0.066684	0.0066684	0.0294224	0.00294224	0.058017	0.0058017
Cac3	313	323	ASADSNGRLNL		30	0.147504	0.0147504	0.0719178	0.00719178	0.0346498	0.00346498
Cac3	313	323	ASADSNGRLNL		60	0.0457846	0.00457846	0.0948656	0.00948656	0.0450382	0.00450382
Cac3	316	323	DSNGRLNL		0	0	0	0	0	0	0
Cac3	316	323	DSNGRLNL		0.01	-0.018383	-0.00262614	0.037148	0.00530686	0.018947	0.00270671
Cac3	316	323	DSNGRLNL		1	0.104862	0.0149803	0.0883048	0.012615	0.187226	0.0267466
Cac3	316	323	DSNGRLNL		10	-0.0723928	-0.0103418	0.108827	0.0155467	-0.0149687	-0.00213838
Cac3	316	323	DSNGRLNL		30	-0.102408	-0.0146296	-0.147979	-0.0211398	0.00749211	0.0010703
Cac3	316	323	DSNGRLNL		60	-0.0650935	-0.00929907	-0.0398889	-0.00569841	0.109487	0.015641
Cac3	324	335	WDIRNMNKSPIA		0	0	0	0	0	0	0
Cac3	324	335	WDIRNMNKSPIA		0.01	0.031121	0.0031121	0.03126	0.003126	0.03833	0.003833
Cac3	324	335	WDIRNMNKSPIA		1	2.75664	0.275664	2.76876	0.276876	2.8165	0.28165
Cac3	324	335	WDIRNMNKSPIA		10	2.96105	0.296105	2.98258	0.298258	3.03241	0.303241
Cac3	324	335	WDIRNMNKSPIA		30	2.99262	0.299262	2.97628	0.297628	3.08051	0.308051
Cac3	324	335	WDIRNMNKSPIA		60	3.05516	0.305516	3.03314	0.303314	3.06851	0.306851
Cac3	324	336	WDIRNMNKSPIAT		0	0	0	0	0	0	0
Cac3	324	336	WDIRNMNKSPIAT		0.01	0.036643	0.00333118	0.035164	0.00319673	0.016414	0.00149218
Cac3	324	336	WDIRNMNKSPIAT		1	3.03823	0.276203	3.0621	0.278373	2.99379	0.272163
Cac3	324	336	WDIRNMNKSPIAT		10	3.74634	0.340577	3.84318	0.34938	3.86944	0.351767
Cac3	324	336	WDIRNMNKSPIAT		30	3.82346	0.347587	3.90595	0.355086	3.89634	0.354213
Cac3	324	336	WDIRNMNKSPIAT		60	3.91674	0.356068	3.90957	0.355416	3.86602	0.351456
Cac3	324	338	WDIRNMNKSPIATME		0	0	0	0	0	0	0
Cac3	324	338	WDIRNMNKSPIATME		0.01	0.060853	0.004681	0.069632	0.00535631	0.010656	0.000819692
Cac3	324	338	WDIRNMNKSPIATME		1	3.10857	0.239121	3.18783	0.245217	2.96735	0.228258
Cac3	324	338	WDIRNMNKSPIATME		10	4.31108	0.331622	4.42567	0.340436	4.28437	0.329567
Cac3	324	338	WDIRNMNKSPIATME		30	4.50115	0.346242	4.48949	0.345345	4.57374	0.351826
Cac3	324	338	WDIRNMNKSPIATME		60	4.53138	0.348568	4.50456	0.346505	4.43941	0.341493
Cac3	324	346	WDIRNMNKSPIATMEHGTSVSTL		0	0	0	0	0	0	0
Cac3	324	346	WDIRNMNKSPIATMEHGTSVSTL		0.01	0.032131	0.00153005	0.006103	0.000290619	0.090593	0.00431395
Cac3	324	346	WDIRNMNKSPIATMEHGTSVSTL		1	2.7227	0.129652	2.72233	0.129635	2.67228	0.127251
Cac3	324	346	WDIRNMNKSPIATMEHGTSVSTL		10	4.10247	0.195356	4.26019	0.202866	4.17957	0.199027
Cac3	324	346	WDIRNMNKSPIATMEHGTSVSTL		30	4.3868	0.208895	4.48416	0.213532	4.92747	0.234641
Cac3	324	346	WDIRNMNKSPIATMEHGTSVSTL		60	4.71734	0.224635	4.78752	0.227977	4.85433	0.231159
Cac3	336	346	TMEHGTSVSTL		0	0	0	0	0	0	0
Cac3	336	346	TMEHGTSVSTL		0.01	0.047547	0.0047547	0.041123	0.0041123	0.020697	0.0020697
Cac3	336	346	TMEHGTSVSTL		1	0.561507	0.0561507	0.486002	0.0486002	0.51114	0.051114
Cac3	336	346	TMEHGTSVSTL		10	1.47149	0.147149	1.63311	0.163311	1.64552	0.164552
Cac3	336	346	TMEHGTSVSTL		30	1.78797	0.178797	1.88096	0.188096	1.91784	0.191784
Cac3	336	346	TMEHGTSVSTL		60	1.99842	0.199842	2.08013	0.208013	2.13326	0.213326
Cac3	346	352	LEWSPNF		0	0	0	0	0	0	0
Cac3	346	352	LEWSPNF		0.01	0.051138	0.0102276	0.043591	0.0087182	0.040674	0.0081348
Cac3	346	352	LEWSPNF		1	1.12869	0.225738	1.09385	0.21877	1.13463	0.226926
Cac3	346	352	LEWSPNF		10	1.9031	0.38062	1.98965	0.397929	2.2462	0.449241
Cac3	346	352	LEWSPNF		30	2.21377	0.442753	2.27912	0.455825	2.28373	0.456747
Cac3	346	352	LEWSPNF		60	2.34308	0.468615	2.22921	0.445841	2.29086	0.458172
Cac3	357	365	ATAGQEDGL		0	0	0	0	0	0	0
Cac3	357	365	ATAGQEDGL		0.01	0.056857	0.00710713	0.060195	0.00752438	0.038769	0.00484612
Cac3	357	365	ATAGQEDGL		1	1.03166	0.128957	1.11366	0.139208	1.11157	0.138946
Cac3	357	365	ATAGQEDGL		10	1.26071	0.157589	1.32441	0.165551	1.38147	0.172683
Cac3	357	365	ATAGQEDGL		30	1.52516	0.190644	1.51507	0.189384	1.53484	0.191855
Cac3	357	365	ATAGQEDGL		60	1.74486	0.218108	1.72392	0.21549	1.76002	0.220003
Cac3	374	389	EETIFTHGGHMLGVND		0	0	0	0	0	0	0
Cac3	374	389	EETIFTHGGHMLGVND		0.01	0.156492	0.0104328	0.083124	0.0055416	0.055205	0.00368033
Cac3	374	389	EETIFTHGGHMLGVND		1	0.858462	0.0572308	0.757801	0.05052	0.815177	0.0543452
Cac3	374	389	EETIFTHGGHMLGVND		10	1.48124	0.0987493	1.57731	0.105154	1.55681	0.103788
Cac3	374	389	EETIFTHGGHMLGVND		30	1.76717	0.117811	1.83337	0.122224	1.83011	0.122008
Cac3	374	389	EETIFTHGGHMLGVND		60	2.04013	0.136009	1.99049	0.132699	1.98693	0.132462
Cac3	375	388	ETIFTHGGHMLGVN		0	0	0	0	0	0	0
Cac3	375	388	ETIFTHGGHMLGVN		0.01	0.041391	0.00318392	0.050429	0.00387915	0.062932	0.00484092
Cac3	375	388	ETIFTHGGHMLGVN		1	0.258566	0.0198897	0.300692	0.0231301	0.375095	0.0288535
Cac3	375	388	ETIFTHGGHMLGVN		10	0.894555	0.068812	0.917007	0.070539	1.51347	0.116421
Cac3	375	388	ETIFTHGGHMLGVN		30	1.14012	0.0877018	1.2523	0.0963305	1.6922	0.130169
Cac3	375	388	ETIFTHGGHMLGVN		60	1.32258	0.101737	1.38625	0.106635	1.93593	0.148917
Cac3	375	389	ETIFTHGGHMLGVND		0	0	0	0	0	0	0
Cac3	375	389	ETIFTHGGHMLGVND		0.01	0.102611	0.00732936	0.088898	0.00634986	0.080101	0.0057215
Cac3	375	389	ETIFTHGGHMLGVND		1	0.396044	0.0282888	0.487504	0.0348217	0.457463	0.0326759
Cac3	375	389	ETIFTHGGHMLGVND		10	1.06785	0.0762747	1.20094	0.0857814	1.23396	0.0881397
Cac3	375	389	ETIFTHGGHMLGVND		30	1.36519	0.0975137	1.39262	0.0994727	1.4223	0.101593
Cac3	375	389	ETIFTHGGHMLGVND		60	1.4513	0.103665	1.63478	0.11677	1.60729	0.114807
Cac3	376	388	TIFTHGGHMLGVN		0	0	0	0	0	0	0
Cac3	376	388	TIFTHGGHMLGVN		0.01	0.017327	0.00144392	0.029883	0.00249025	0.027481	0.00229008
Cac3	376	388	TIFTHGGHMLGVN		1	0.44591	0.0371591	0.618341	0.0515284	0.628988	0.0524157
Cac3	376	388	TIFTHGGHMLGVN		10	1.31256	0.10938	1.45053	0.120877	1.54495	0.128746
Cac3	376	388	TIFTHGGHMLGVN		30	1.64339	0.136949	1.78976	0.149147	1.89178	0.157648
Cac3	376	388	TIFTHGGHMLGVN		60	1.78501	0.148751	1.99982	0.166651	2.02148	0.168457
Cac3	376	389	TIFTHGGHMLGVND		0	0	0	0	0	0	0
Cac3	376	389	TIFTHGGHMLGVND		0.01	0.02275	0.00175	0.036255	0.00278885	0.029381	0.00226008
Cac3	376	389	TIFTHGGHMLGVND		1	0.317386	0.0244143	0.327042	0.0251571	0.375776	0.0289059
Cac3	376	389	TIFTHGGHMLGVND		10	1.08327	0.0833287	1.14333	0.0879486	1.17907	0.0906979
Cac3	376	389	TIFTHGGHMLGVND		30	1.35803	0.104464	1.48039	0.113876	1.42503	0.109618
Cac3	376	389	TIFTHGGHMLGVND		60	1.59311	0.122547	1.64224	0.126326	1.63663	0.125895
Cac3	377	388	IFTHGGHMLGVN		0	0	0	0	0	0	0
Cac3	377	388	IFTHGGHMLGVN		0.01	0.074221	0.00674736	0.074065	0.00673318	0.066608	0.00605527
Cac3	377	388	IFTHGGHMLGVN		1	0.3201	0.0291	0.336185	0.0305622	0.351953	0.0319957
Cac3	377	388	IFTHGGHMLGVN		10	1.00163	0.0910572	1.05247	0.0956795	1.03431	0.0940279
Cac3	377	388	IFTHGGHMLGVN		30	1.24182	0.112892	1.21111	0.110101	1.23497	0.11227
Cac3	377	388	IFTHGGHMLGVN		60	1.28324	0.116658	1.32613	0.120557	1.45176	0.131978
Cac3	377	389	IFTHGGHMLGVND		0	0	0	0	0	0	0
Cac3	377	389	IFTHGGHMLGVND		0.01	0.035386	0.00294883	0.036941	0.00307842	0.036002	0.00300017
Cac3	377	389	IFTHGGHMLGVND		1	0.210746	0.0175621	0.279602	0.0233001	0.310275	0.0258562
Cac3	377	389	IFTHGGHMLGVND		10	0.788036	0.0656696	0.838614	0.0698845	0.888912	0.074076
Cac3	377	389	IFTHGGHMLGVND		30	1.0355	0.0862916	1.0738	0.0894829	1.13871	0.0948923
Cac3	377	389	IFTHGGHMLGVND		60	1.15793	0.0964944	1.21353	0.101127	1.27925	0.106605
Cac3	389	399	DISWDAHDPWL		0	0	0	0	0	0	0
Cac3	389	399	DISWDAHDPWL		0.01	0.05114	0.00568222	0.036725	0.00408056	0.040979	0.00455322
Cac3	389	399	DISWDAHDPWL		1	0.236754	0.026306	0.25518	0.0283534	0.203737	0.0226374
Cac3	389	399	DISWDAHDPWL		10	1.07902	0.119892	1.21879	0.135421	1.24299	0.13811
Cac3	389	399	DISWDAHDPWL		30	1.66591	0.185102	1.76829	0.196476	1.75399	0.194887
Cac3	389	399	DISWDAHDPWL		60	1.95122	0.216802	2.02105	0.224561	1.98413	0.220459
Cac3	389	400	DISWDAHDPWLM		0	0	0	0	0	0	0
Cac3	389	400	DISWDAHDPWLM		0.01	-0.034704	-0.0034704	0.005254	0.0005254	0.019444	0.0019444
Cac3	389	400	DISWDAHDPWLM		1	0.0507193	0.00507193	0.211402	0.0211402	0.243761	0.0243761
Cac3	389	400	DISWDAHDPWLM		10	0.907678	0.0907678	1.14526	0.114526	1.33772	0.133772
Cac3	389	400	DISWDAHDPWLM		30	1.558	0.1558	1.62443	0.162443	1.84857	0.184857
Cac3	389	400	DISWDAHDPWLM		60	1.9562	0.19562	1.93232	0.193232	2.13844	0.213844
Cac3	390	399	ISWDAHDPWL		0	0	0	0	0	0	0
Cac3	390	399	ISWDAHDPWL		0.01	0.060256	0.007532	0.05221	0.00652625	0.040293	0.00503663
Cac3	390	399	ISWDAHDPWL		1	0.239257	0.0299072	0.287339	0.0359173	0.210365	0.0262957
Cac3	390	399	ISWDAHDPWL		10	1.04472	0.13059	1.18907	0.148634	1.16706	0.145882
Cac3	390	399	ISWDAHDPWL		30	1.56849	0.196061	1.66382	0.207977	1.67334	0.209167
Cac3	390	399	ISWDAHDPWL		60	1.8915	0.236437	1.91944	0.23993	1.86435	0.233044
Cac3	390	400	ISWDAHDPWLM		0	0	0	0	0	0	0
Cac3	390	400	ISWDAHDPWLM		0.01	0.066424	0.00738044	0.067264	0.00747378	0.031727	0.00352522
Cac3	390	400	ISWDAHDPWLM		1	0.268943	0.0298826	0.241858	0.0268731	0.205873	0.0228748
Cac3	390	400	ISWDAHDPWLM		10	1.05499	0.117221	1.15474	0.128304	1.1753	0.130589
Cac3	390	400	ISWDAHDPWLM		30	1.68447	0.187163	1.62866	0.180962	1.65213	0.18357
Cac3	390	400	ISWDAHDPWLM		60	1.94521	0.216135	1.96348	0.218165	1.94964	0.216627
Cac3	390	401	ISWDAHDPWLMC		0	0	0	0	0	0	0
Cac3	390	401	ISWDAHDPWLMC		0.01	0.067823	0.0067823	0.0638	0.00638	0.035078	0.0035078
Cac3	390	401	ISWDAHDPWLMC		1	0.231598	0.0231598	0.233335	0.0233335	0.204226	0.0204226
Cac3	390	401	ISWDAHDPWLMC		10	1.00351	0.100351	1.08005	0.108005	1.09468	0.109468
Cac3	390	401	ISWDAHDPWLMC		30	1.45222	0.145222	1.54567	0.154567	1.45766	0.145766
Cac3	390	401	ISWDAHDPWLMC		60	1.75906	0.175906	1.79677	0.179677	1.73742	0.173742
Cac3	400	418	MCSVANDNSVHIWKPAGNL		0	0	0	0	0	0	0
Cac3	400	418	MCSVANDNSVHIWKPAGNL		0.01	0.038631	0.00227241	0.040269	0.00236876	0.021633	0.00127253
Cac3	400	418	MCSVANDNSVHIWKPAGNL		1	0.517183	0.0304225	0.567834	0.033402	0.499841	0.0294024
Cac3	400	418	MCSVANDNSVHIWKPAGNL		10	1.05453	0.0620312	1.06921	0.0628945	1.10799	0.0651757
Cac3	400	418	MCSVANDNSVHIWKPAGNL		30	1.64802	0.0969422	1.66766	0.0980976	1.53941	0.0905536
Cac3	400	418	MCSVANDNSVHIWKPAGNL		60	1.95196	0.114821	2.00841	0.118142	1.85966	0.109391
Cac3	402	418	SVANDNSVHIWKPAGNL		0	0	0	0	0	0	0
Cac3	402	418	SVANDNSVHIWKPAGNL		0.01	0.025801	0.00172007	0.026353	0.00175687	0.047388	0.0031592
Cac3	402	418	SVANDNSVHIWKPAGNL		1	0.619356	0.0412904	0.60838	0.0405586	0.672475	0.0448317
Cac3	402	418	SVANDNSVHIWKPAGNL		10	1.17142	0.0780949	1.19996	0.0799975	1.28987	0.0859916
Cac3	402	418	SVANDNSVHIWKPAGNL		30	1.91839	0.127893	1.78171	0.118781	1.8356	0.122373
Cac3	402	418	SVANDNSVHIWKPAGNL		60	2.17174	0.144783	2.10029	0.14002	2.12776	0.14185
Cac3	403	418	VANDNSVHIWKPAGNL		0	0	0	0	0	0	0
Cac3	403	418	VANDNSVHIWKPAGNL		0.01	0.02656	0.00189714	0.038438	0.00274557	-0.00382	-0.000272857
Cac3	403	418	VANDNSVHIWKPAGNL		1	0.915141	0.0653672	0.944778	0.0674841	0.889982	0.0635702
Cac3	403	418	VANDNSVHIWKPAGNL		10	1.48864	0.106331	1.52522	0.108944	1.43385	0.102418
Cac3	403	418	VANDNSVHIWKPAGNL		30	2.0921	0.149436	2.05807	0.147005	2.01999	0.144285
Cac3	403	418	VANDNSVHIWKPAGNL		60	2.30809	0.164863	2.34129	0.167235	2.23374	0.159553
Cac3	404	418	ANDNSVHIWKPAGNL		0	0	0	0	0	0	0
Cac3	404	418	ANDNSVHIWKPAGNL		0.01	0.000884	6.8e-05	-0.002142	-0.000164769	0.02444	0.00188
Cac3	404	418	ANDNSVHIWKPAGNL		1	0.520409	0.0400315	0.540523	0.0415787	0.608915	0.0468396
Cac3	404	418	ANDNSVHIWKPAGNL		10	1.24842	0.0960322	1.27322	0.0979396	1.32532	0.101947
Cac3	404	418	ANDNSVHIWKPAGNL		30	1.86915	0.143781	1.72861	0.13297	1.79685	0.138219
Cac3	404	418	ANDNSVHIWKPAGNL		60	2.15648	0.165883	1.99778	0.153675	2.08394	0.160303
Cac3	407	418	NSVHIWKPAGNL		0	0	0	0	0	0	0
Cac3	407	418	NSVHIWKPAGNL		0.01	0.136446	0.0136446	0.098997	0.0098997	0.101574	0.0101574
Cac3	407	418	NSVHIWKPAGNL		1	0.639551	0.0639551	0.605512	0.0605512	0.626885	0.0626885
Cac3	407	418	NSVHIWKPAGNL		10	0.981713	0.0981713	1.12624	0.112624	0.937472	0.0937472
Cac3	407	418	NSVHIWKPAGNL		30	1.326	0.1326	1.75686	0.175686	1.23831	0.123831
Cac3	407	418	NSVHIWKPAGNL		60	1.83001	0.183001	1.83621	0.183621	1.3984	0.13984
Cac3	409	418	VHIWKPAGNL		0	0	0	0	0	0	0
Cac3	409	418	VHIWKPAGNL		0.01	0.100356	0.0125445	-0.019488	-0.002436	0.121015	0.0151269
Cac3	409	418	VHIWKPAGNL		1	0.93977	0.117471	0.769454	0.0961817	0.912357	0.114045
Cac3	409	418	VHIWKPAGNL		10	1.42664	0.17833	1.23337	0.154171	1.50964	0.188704
Cac3	409	418	VHIWKPAGNL		30	1.91089	0.238861	1.72147	0.215183	1.81699	0.227124
Cac3	409	418	VHIWKPAGNL		60	2.10941	0.263677	1.89164	0.236455	2.12315	0.265393
